# Supplementary material for: The gut microbiome, single nucleotide polymorphisms, and differentially expressed genes promote aggression in an ant
Source: Research Square preprint supplement (doi:10.21203/rs.3.rs-8539228/v1), 2026-01-09
Supplement: Supplementary file 1 [file ForR_CHC_results.xlsx]

## Sheet: values
nest	col	C12	C13en2	C13	C14en	C14	C15en1	C15en2	C15en3	C15en4	C15	C16	Tetradecanal	C17en1	C17en2	C17en3	C17en4	C17	C172	C18	Hexadecanal	C181	C184	Heptadecanal C191	C20	Octadecanal C201	C21	C22	Z90Tricosene	Z70Tricosene	C23	110Methyltricosane	30Methyltricosane	C24	C25en1	C25en2	Z110Pentacosene	C25en3 Z90Pentacosene	C25en4	C25	130Metylpentacosane	30Methylpentacosane	C26	Z110Heptacosene C27en1	Z90Heptacosene C27en2	Z70Heptacosene C27en3	C27en4	C27	130Methylheptacosane
SQ-A2A	SQ-A2	0.00975868	0.00237944	0.0146072	0.0047517	0.0161323	0.0339009	0.0108255	0.00259907	0.0101624	0.219128	0.0125632	0.00559211	0.082338	0.00250372	0.00810677	0.0018228	0.0153	0.0038108	0.0217134	0.0424168	0.001897	0.0126999	0.00563876	0.026558	0.0332395	0.00469941	0.00667536	0.0681059	0.0246441	0.130464	0.0109607	0.125322	0.0174905	0.00155453	0.00579524	0.00288723	0.182019	0.0509988	0.12314	0.0352513	0.0176459	0.00976961	0.00502723	0.0188239	0.0164115	0.00328986	0.03394	0.00771377
SQ-A2B	SQ-A2	0.0110973	0.00314016	0.0123441	0.00547177	0.00983181	0.0432514	0.0153596	0.00287896	0.0105533	0.0311999	0.0123928	0.00594469	0.0477015	0.00717532	0.0093895	0.0035846	0.00961382	0.00463738	0.0260433	0.052333	0.00243276	0.0149049	0.00552359	0.0351928	0.042268	0.00711826	0.00656559	0.0470057	0.0281802	0.122753	0.0104887	0.125256	0.0153261	0.00281919	0.00750717	0.00446649	0.194504	0.0528192	0.109346	0.0374278	0.0181064	0.00853294	0.00507299	0.0180314	0.0159123	0.00297388	0.0289686	0.0101104
SQ-A2C	SQ-A2	0.0102076	0.00210552	0.010041	0.00361801	0.0114206	0.0205589	0.00701592	0.00234193	0.00856813	0.089852	0.0103755	0.00432749	0.0482667	0.00469549	0.00797144	0.00458268	0.0109379	0.00346611	0.0185269	0.0347643	0.00193014	0.00675724	0.00493106	0.0209382	0.0277486	0.00524667	0.00674237	0.0595961	0.0197046	0.120247	0.0112974	0.13899	0.017047	0.00181529	0.00617366	0.00203191	0.157671	0.0488154	0.119871	0.0427921	0.019706	0.0110408	0.00433366	0.0164123	0.0155539	0.00281829	0.0406947	0.0103179
SQ-A2D	SQ-A2	0.00996939	0.00378675	0.0129858	0.00615721	0.0118718	0.00750817	0.00269149	0.00276547	0.00740633	0.0329801	0.0243207	0.00283021	0.0102165	0.00612247	0.00774185	0.00209881	0.0248164	0.00438477	0.03264	0.012777	0.00260262	0.00650625	0.00443379	0.0107332	0.008673	0.00704808	0.00944462	0.0237686	0.0138807	0.141681	0.011813	0.141831	0.0233759	0.00215865	0.00687477	0.00904093	0.0614076	0.0450757	0.218287	0.0416532	0.0206837	0.0111617	0.00293689	0.00677676	0.00700973	0.00167645	0.050994	0.00908111
SQ-A2E	SQ-A2	0.00597465	0.00111439	0.00942512	0.00178584	0.0058706	0.00346065	0.00141133	0.00163256	0.00255878	0.00999749	0.0057295	0.00114887	0.00342929	0.00203571	0.00152243	0.00444658	0.00669092	0.00270118	0.00739406	0.00221958	0.00226829	0	0.0047634	0.00342063	0.00145076	0.00515381	0.00757354	0.00968112	0.0119058	0.12498	0.0106705	0.117742	0.0201183	0.00205459	0.00483914	0.00221779	0.0551141	0.0469909	0.206648	0.0318587	0.0157446	0.01095	0.00108405	0.00427219	0.00125868	0.00348029	0.0457912	0.00705993
SQ-A5A	SQ-A5	0.00961404	0.000801912	0.00778229	0.00171179	0.00728722	0.00486056	0.00319064	0.000593955	0.00130404	0.00295181	0.00204707	0.000927437	0.00542477	0.000815146	0.00111896	0.00635612	0.00187543	0.000733283	0.00169834	0.000923063	0.00174986	0	0.00356144	0.00072112	0.00108127	0.00358772	0.0076381	0.00939016	0.0125637	0.165713	0.00598822	0.0757957	0.0198622	0.00234864	0.00354395	0	0.0922786	0.0503546	0.18822	0.0180611	0.0144565	0.0112544	0.00170654	0.00857696	0.00866708	0	0.0457147	0.00724183
SQ-A5B	SQ-A5	0.00882646	0.00122229	0.00757192	0.00171542	0.00836563	0.00931688	0.00631853	0.00130683	0.00323336	0.0566048	0.00490004	0.00155961	0.0198675	0.00198686	0.00286688	0.00264893	0.00686104	0.00141298	0.00473361	0.00646472	0.00110666	0.00180162	0.00404643	0.00259513	0.00389785	0.00527112	0.00885321	0.02028	0.0230524	0.213569	0.00595962	0.076545	0.0244639	0.00223258	0.0034119	0.000757228	0.130989	0.0535075	0.230858	0.011456	0.0142602	0.0247162	0.00236988	0.0111525	0.0121293	0.00280531	0.0766498	0.00580686
SQ-A5C	SQ-A5	0.0097031	0.000812103	0.00715982	0.00121068	0.00804394	0.00920121	0.00597015	0.00134524	0.00141577	0.00587141	0.00309662	0.00113755	0.0134895	0.00170138	0.00140699	0.00588412	0.002759	0.00168801	0.00274066	0.0012759	0.00142873	0.00145709	0.00412331	0.0014562	0.00297192	0.00368503	0.0073729	0.00936125	0.0123372	0.204956	0.00583435	0.0756034	0.0235854	0.00246242	0.00363105	0.000493955	0.0991279	0.0479609	0.235634	0.0137374	0.0152098	0.014437	0.00170248	0.0108462	0.00358923	0.0105067	0.0621457	0.00720817
SQ-A5D	SQ-A5	0.00518195	0.00061798	0.00995898	0.00081302	0.00529728	0.00447088	0.00300863	0.00134123	0.00114376	0.00691539	0.00427162	0.00057967	0.00419898	0.0014469	0.000662719	0.000906716	0.00525256	0.000981973	0.00473445	0.00061963	0.00180964	0.000186219	0.00363107	0.00246558	0.000619713	0.0050658	0.00967147	0.0048464	0.00656457	0.247036	0.00448574	0.0599486	0.0273769	0.00195187	0.00268895	0.00194005	0.0328796	0.0215651	0.301131	0.009289	0.0112539	0.0124875	0.000665621	0.00279791	0.00218324	0.00119239	0.0640864	0.00435746
SQ-A5E	SQ-A5	0.00551045	0.00165332	0.0137572	0.00167773	0.0125014	0.0154116	0.008936	0.00388656	0.00285314	0.1899	0.00759104	0.00112861	0.0302267	0.00757551	0.0015765	0.00156543	0.019624	0.00116632	0.0061965	0.00284333	0.00179624	0.00186592	0.00391587	0.00291327	0.00105472	0.00506369	0.00883804	0.00514305	0.00707132	0.219016	0.00344162	0.0550916	0.0242232	0.00169018	0.0022521	0.00176863	0.0334795	0.0230434	0.271239	0.017316	0.00926979	0.0124741	0.000791766	0.00264397	0.00194459	0.00113809	0.058407	0.00350284
SQ-A6A	SQ-A6	0.0115521	0.00128488	0.00790712	0.00279201	0.0091848	0.00883747	0.00446342	0.00139693	0.00334657	0.0123397	0.00542395	0.00312663	0.0188923	0.00583633	0.00491442	0.008682	0.00725209	0.00397199	0.0116264	0.0106151	0.002106	0.00574502	0.00387859	0.0139472	0.0175648	0.00329415	0.0057225	0.0312968	0.0178508	0.133618	0.00851401	0.139794	0.0188663	0.00463217	0.00881161	0.00321779	0.199348	0.0707813	0.178554	0.0282922	0.0239579	0.0147564	0.00514226	0.021508	0.0176601	0.00169428	0.0450188	0.00650659
SQ-A6B	SQ-A6	0.00907013	0.0010421	0.00765455	0.00212013	0.00793649	0.0138534	0.00600071	0.00149974	0.00283034	0.0184478	0.00451659	0.00224484	0.0258938	0.00212714	0.00418193	0.00515056	0.006301	0.00337725	0.00846818	0.00697822	0.00165935	0.00334476	0.00418254	0.00826524	0.0113724	0.00351472	0.00420616	0.0199532	0.0129127	0.0871793	0.00465622	0.0956372	0.0139866	0.00300205	0.00584842	0	0.144522	0.0541698	0.13431	0.0201648	0.0166426	0.0104829	0.00320734	0.0158811	0.0166964	0	0.0361106	0.00901701
SQ-A6C	SQ-A6	0.00977843	0.00120477	0.0070376	0.00215156	0.00881322	0.00905469	0.00416323	0.0012471	0.00319605	0.0115703	0.00608646	0.003368	0.01447	0.0044864	0.00508442	0.00682925	0.00687772	0.00414717	0.0111511	0.0104514	0.00179226	0.00492811	0.00390772	0.0141962	0.0177897	0.00339946	0.00640942	0.0317728	0.0171941	0.156971	0.00764553	0.12648	0.0224956	0.00426787	0.00832927	0.00511934	0.195191	0.0612708	0.208425	0.00986631	0.0226651	0.0178782	0.0051166	0.0193811	0.0156738	0.00493366	0.0513661	0.00600691
SQ-A6D	SQ-A6	0.00764498	0.00380986	0.0107512	0.0053866	0.0102273	0.00830154	0.00370834	0.00311766	0.00725136	0.0176088	0.018319	0.00469666	0.0149918	0.00860513	0.0103833	0.00150213	0.0318013	0.00658764	0.0409265	0.0156416	0.00250218	0.00590154	0.00479173	0.0232613	0.0220084	0.0062703	0.00632572	0.0255232	0.0101438	0.10589	0.00646679	0.0851661	0.0177173	0.00318805	0.00706999	0.00717921	0.0837423	0.0473377	0.200787	0.0204552	0.0158251	0.0116206	0.0026157	0.00689459	0.0041243	0.00297091	0.0482604	0.00710997
SQ-A6E	SQ-A6	0.00548784	0.00210513	0.0101784	0.00270104	0.00780004	0.00870324	0.00349997	0.00275834	0.00354139	0.0270002	0.0111574	0.00176897	0.0216941	0.00790418	0.00453076	0.00190258	0.0199439	0.00354015	0.0202552	0.00529883	0.00231626	0.00346081	0.0041621	0.00737202	0.00583304	0.00386307	0.00494165	0.0121096	0.00696389	0.0785378	0.00416709	0.0820376	0.0152562	0.00322579	0.00617762	0.00309138	0.0563761	0.0375558	0.171113	0.0185128	0.0139318	0.010255	0.00196381	0.0048474	0.00284615	0.00192704	0.0380815	0.00226419
SQ-N1A	SQ-N1	0.00943259	0.000801918	0.00715012	0.00109548	0.00716393	0.00290733	0.00158031	0.00174563	0.00151643	0.00583848	0.00477775	0.000715049	0.00452647	0.00275904	0.000989986	0.00209491	0.00415401	0.000868234	0.00373336	0.000692742	0.00134908	0	0.00314429	0.00175966	0.000694418	0.00291429	0.0052907	0.00721573	0.00818215	0.0901278	0.026473	0.0672155	0.0169215	0.000871244	0.00310804	0.00145713	0.0462204	0.038002	0.19877	0.116668	0.00868656	0.0111723	0.00258316	0.00544524	0.0024627	0.001113	0.0430086	0.0181482
SQ-N1B	SQ-N1	0.00963024	0.000532438	0.00931511	0.00110114	0.007771	0.0021024	0.00118591	0.00205365	0.000885197	0.00906076	0.00321992	0.000518995	0.00296079	0.00264902	0	0.00321722	0.00450838	0.0014207	0.00271983	0	0.00128629	0.00109629	0.00475094	0.00167117	0	0.00283343	0.00504284	0.00424071	0.00495277	0.0994666	0.0209852	0.0617317	0.0209204	0.000673202	0.00277508	0.000549099	0.018247	0.0171449	0.267839	0.0844147	0.00794824	0.0160737	0.00161671	0.00248818	0.00157048	0.000700719	0.0570725	0.0180419
SQ-N1C	SQ-N1	0.00985241	0	0.00933469	0.000723722	0.00806769	0.00153089	0.000908104	0.00151026	0.000715459	0.0046128	0.0035883	0	0.0022677	0.00207552	0	0.0023042	0.00368904	0.00112744	0.00272264	0	0.0013626	0	0.00401083	0.00140464	0	0.00302301	0.00489802	0.0070875	0.00894232	0.108666	0.0248673	0.0884108	0.0207739	0.000846001	0.00398519	0.00115923	0.0362803	0.0443683	0.293628	0.0974247	0.0122718	0.0142199	0.00206604	0.00436425	0.00320308	0.00147086	0.0628157	0.0221304
SQ-N1D	SQ-N1	0.00510594	0.00101132	0.00895779	0.00144886	0.00584659	0.00272804	0.00156828	0.00154344	0.00164943	0.00690923	0.00438077	0.000920547	0.0058348	0.00148126	0.00144554	0.0188471	0.0061567	0.00263441	0.00647711	0.00221549	0.00329192	0.00144852	0.00597341	0.00343854	0.00211477	0.00454771	0.00456475	0.00736811	0.00822677	0.0870009	0.0185305	0.0490071	0.0157797	0.000753604	0.00243304	0.00315891	0.0487427	0.0421702	0.176208	0.0665172	0.00689872	0.00996133	0.00256857	0.0066902	0.00346433	0.00188918	0.036344	0.0143589
SQ-N1E	SQ-N1	0.00478193	0.000761849	0.00923772	0.000811563	0.00438134	0.00145211	0.000742609	0.000636277	0.000819769	0.0118565	0.00351235	0.000600236	0.0036277	0.00131736	0.000805344	0.00140654	0.00467249	0.00142437	0.00388941	0.000831294	0.00175977	0.000848938	0.00438842	0.00189743	0.000594471	0.00286015	0.00385612	0.00649199	0.00832442	0.0686249	0.0112649	0.0422791	0.0124993	0.000520251	0.00213048	0.00198329	0.0361113	0.0277943	0.155264	0.0427212	0.00633832	0.00813892	0.00101099	0.0030827	0.00246552	0.00121112	0.0320032	0.011443
SQ-N4A	SQ-N4	0.00973821	0	0.00871841	0.00137179	0.00845843	0.00256788	0.000979343	0.00169108	0.000921156	0.0197334	0.00362697	0.000788652	0.00806914	0.00458028	0.000768068	0.00346598	0.00530982	0.00207012	0.00304776	0.000981556	0.00127072	0.00174298	0.00358769	0.00111241	0.000881567	0.00256038	0.00212409	0.00354595	0.0050939	0.0375319	0.0104096	0.0296149	0.00893949	0.000892927	0.00157255	0	0.0198229	0.0236567	0.117834	0.0568035	0.00721421	0.00920655	0.00168029	0.00349092	0.00264496	0.000988231	0.0361844	0.017918
SQ-N4B	SQ-N4	0.00946649	0.000744518	0.00840608	0.000730447	0.0075959	0.00318237	0.00125242	0.00209892	0.000941517	0.0294293	0.00345655	0.000676755	0.0114892	0.00689907	0	0.00438013	0.00669652	0.00132208	0.00285577	0.000802998	0.00113131	0.00134165	0.00380022	0.00126991	0.000987133	0.00256425	0.00295345	0.00197639	0.002039	0.0337228	0.00665134	0.0266556	0.00880342	0.000612421	0.00158443	0	0.011817	0.0099666	0.107968	0.0396157	0.00821887	0.00949534	0.00123446	0.00252721	0.00237574	0	0.032475	0.0111571
SQ-N4C	SQ-N4	0.0103722	0.000873319	0.010693	0.00199982	0.00882164	0.00513811	0.00222671	0.00329579	0.00108831	0.0168855	0.00394393	0.000580668	0.0122046	0.00772494	0	0.00353052	0.00686554	0.00124554	0.00258995	0.000569107	0.00132936	0.00145441	0.00386563	0.00163639	0	0.00252614	0.00235701	0.00285711	0.00232891	0.0353858	0.0140087	0.0362075	0.0107957	0.000899606	0.00206779	0.000964118	0.0212951	0.0203585	0.133617	0.0770757	0.00990916	0.0135622	0.00195147	0.00317993	0.00158432	0	0.045822	0.0190416
SQ-N4D	SQ-N4	0.00390327	0.000408184	0.00976978	0.000645422	0.00417815	0.00613769	0.00215044	0.00247261	0.00106419	0.0166766	0.00308568	0.000905307	0.0110365	0.00338692	0.000949999	0.00062988	0.00725799	0.00147535	0.00346799	0.000847139	0.0018142	0.0011105	0.00453252	0.00184914	0.000455584	0.0023873	0.00266716	0.00226209	0.00203741	0.0382167	0.00497261	0.0228231	0.00877457	0.000776333	0.00130935	0	0.013227	0.00816392	0.101518	0.0247122	0.00586181	0.0083485	0.000839364	0.00154487	0.000982725	0	0.0285798	0.00804158
SQ-N4E	SQ-N4	0.00372189	0	0.0106481	0.000898516	0.00401883	0.0038498	0.00123785	0.00130714	0.00104308	0.0197938	0.00351027	0.00057502	0.0102754	0.00319807	0.00123667	0.000886548	0.00687412	0.00125405	0.00361953	0.00114407	0.00171741	0.00184133	0.00453352	0.00200773	0	0.00244894	0.00312457	0.00292812	0.00336564	0.0514165	0.00491704	0.0252276	0.011741	0.00091407	0.00138135	0.00103877	0.0210315	0.0131004	0.146965	0.0214798	0.0058041	0.0130339	0.00135466	0.00281457	0.00163866	0.000366924	0.0416792	0.0090311
SQ-N6A	SQ-N6	0.0103469	0.000664488	0.00835779	0.00124689	0.0082984	0.0115308	0.00349827	0.00426763	0.00224147	0.03193	0.00410433	0.000651553	0.0139427	0.00734003	0.00155812	0.0024296	0.00711293	0.00169304	0.00326376	0.00136727	0.00134984	0.00100099	0.00347865	0.00131105	0.00104948	0.00195852	0.00307369	0.00421355	0.00479837	0.0776451	0.0134441	0.0489061	0.0135204	0.000748481	0.00316985	0.00102602	0.0294687	0.0304598	0.175534	0.0743435	0.0119977	0.0111553	0.00177622	0.00481301	0.00285228	0.00129146	0.0516036	0.0193269
SQ-N6C	SQ-N6	0.0125605	0	0.010807	0.00132142	0.00931796	0.00938651	0.00345212	0.00361499	0.0010396	0.0181489	0.00329095	0.000488481	0.0111505	0.00571787	0	0.00905034	0.00497068	0.00173363	0.00305228	0.000712749	0.00119222	0	0.00354258	0.00139315	0.000840367	0.00265038	0.00339608	0.00476319	0.005821	0.0747242	0.0165075	0.0513928	0.0170979	0.000939516	0.00362299	0.00133145	0.0366374	0.041303	0.210566	0.097368	0.0128266	0.0164107	0.00237325	0.00609234	0.00358627	0.00137375	0.0700972	0.0237691
SQ-N6D	SQ-N6	0.00498611	0.000611647	0.010429	0.00115999	0.0051107	0.00649666	0.00238689	0.00188402	0.00131251	0.0112775	0.00397047	0.000867219	0.00639249	0.00236702	0.000998857	0.00982166	0.00535065	0.00195801	0.00423062	0.000906725	0.00167969	0.00208724	0.00427754	0.00222428	0.000767308	0.00334959	0.00441922	0.00781091	0.0108637	0.0864404	0.0178682	0.062424	0.0161577	0.000844976	0.00365555	0.00287543	0.0552582	0.0445103	0.209921	0.0945023	0.01386	0.012697	0.00271555	0.00823957	0.00551536	0.00207377	0.0595744	0.0232416
SQ-N6F	SQ-N6	0.00566296	0.00131194	0.00943532	0.00281173	0.00638544	0.00851801	0.00264447	0.00242347	0.00450326	0.0323324	0.0102273	0.0014582	0.015323	0.00488272	0.00337422	0.00130815	0.0123191	0.00276878	0.0126041	0.00789048	0.00156478	0	0.00434632	0.0060158	0.00442931	0.00405507	0.00290668	0.0116818	0.00528307	0.0479282	0.00746087	0.029446	0.0110103	0.000839623	0.00167657	0	0.02902	0.0172926	0.11855	0.0410217	0.00745368	0.00904678	0.00102151	0.00295512	0.00157958	0.000471432	0.0370678	0.00963092
SQ-S1B	SQ-S1	0.00984395	0.000665074	0.00728441	0.00122044	0.00873228	0.00365385	0.00164226	0.00226068	0.00195899	0.0115109	0.00416186	0.000751318	0.00820583	0.00389833	0.00147289	0.00423739	0.00447437	0.0007512	0.00355922	0.001287	0.00124446	0.00134761	0.00321643	0.001484	0.00125237	0.0027138	0.00382628	0.00597126	0.0073234	0.0741219	0.00359013	0.0473883	0.0141655	0.00308655	0.00270475	0	0.0421384	0.033794	0.155168	0.0302575	0.0120753	0.0118826	0.00060475	0.00588662	0.00613038	0	0.0461845	0.00574612
MQ-S1C	MQ-S1	0.00860535	0.000629097	0.00696847	0.00137776	0.00746714	0.00292648	0.00124853	0.00147421	0.00122342	0.00525074	0.00295665	0.000743864	0.00482939	0.002591	0.00110598	0.00308136	0.00307862	0.00140072	0.00338705	0.00138931	0.00143748	0.000876258	0.00326989	0.00109422	0.00103893	0.00213103	0.00298583	0.00666318	0.00863339	0.0656099	0.00352697	0.0351146	0.0118506	0.00271804	0.00200063	0	0.0422439	0.0316176	0.151417	0.0254659	0.00895606	0.00989614	0.000867365	0.00522556	0.00908778	0.00111941	0.0419798	0.00464058
MQ-S1D	MQ-S1	0.00684921	0.0012968	0.0192872	0.00178852	0.00730293	0.00250203	0.000962867	0.00207393	0.00203294	0.00986537	0.00683588	0.000519954	0.00332398	0.00248234	0.00205914	0.00259956	0.00905436	0.00326077	0.00942896	0.00211307	0.0020334	0.0011849	0.00435081	0.00421751	0.00162726	0.00545858	0.00628754	0.0031914	0.00316232	0.0778398	0.00350995	0.037922	0.0146538	0.0029554	0.00236569	0.00128301	0.0161574	0.0139299	0.163215	0.0275044	0.0100951	0.00820272	0	0.00278361	0.00169089	0.00103491	0.0380137	0.00462585
MQ-S1E	MQ-S1	0.00589673	0.00056484	0.0207426	0.000498335	0.00510038	0.00163279	0.000634638	0.000790171	0.000555156	0.00601908	0.00373469	0	0.00234035	0.00131644	0.000438008	0.000736429	0.00499667	0.00258285	0.00436394	0	0.00220409	0.000960096	0.00358255	0.00209191	0	0.00325183	0.00351428	0.00177781	0.00166644	0.0447531	0.00200644	0.022111	0.00795011	0.00165189	0.00164065	0.000779665	0.00923768	0.00404982	0.0867953	0.0160035	0.00645266	0.00639904	0	0.00174987	0.000853947	0	0.0294678	0.0071278
MQ-S1F	MQ-S1	0.00610368	0.000435416	0.019933	0.000724953	0.00577464	0.00175839	0.000785787	0.00125053	0.00100562	0.00906821	0.00467525	0	0.00359512	0.00246332	0.00087784	0.00142138	0.00632802	0.00262706	0.00523748	0.0005106	0.00214438	0.00118497	0.00365544	0.00303081	0.000823862	0.00482969	0.00603724	0.00362813	0.00501645	0.0606481	0.00294597	0.0283373	0.0122297	0.00230923	0.00180125	0.001486	0.0185634	0.0138403	0.139587	0.0220799	0.00745775	0.00844846	0	0.00245847	0.00125411	0.000998775	0.0321922	0.00398304
MQ-S2A	MQ-S2	0.0100264	0.00333662	0.0108856	0.00454989	0.0101354	0.00450738	0.00135298	0.00123806	0.00687972	0.0201865	0.010862	0.00813372	0.0150864	0.00205783	0.00804756	0.0043652	0.00945858	0.00335874	0.0167194	0.0302466	0.00188046	0.00354011	0.00484959	0.0184507	0.0298106	0.00500907	0.00412516	0.0370388	0.0136735	0.0730581	0.00594901	0.0914312	0.0151343	0.00385272	0.00694205	0.00226563	0.158927	0.0524195	0.124191	0.0550672	0.0305702	0.0152802	0.00226522	0.0270013	0.0151813	0.00193772	0.0403363	0.0211689
MQ-S2B	MQ-S2	0.00878636	0.000858547	0.0095785	0.00120327	0.00687789	0.00620795	0.00198124	0.00105657	0.00180001	0.0167024	0.00324195	0.00109665	0.00981232	0.00105359	0.00180186	0.00419161	0.00362061	0.00223655	0.00414451	0.00292598	0.00129813	0	0.00460661	0.0018257	0.00222578	0.00150375	0.00299842	0.00950428	0.0106274	0.0631469	0.0033527	0.0756194	0.0134929	0.00257782	0.00432411	0	0.120608	0.0653434	0.128399	0.0319089	0.0194317	0.0108351	0	0.0156201	0.0133531	0	0.0373943	0.00654845
MQ-S2C	MQ-S2	0.00889244	0.000845929	0.00839401	0.00129961	0.00721282	0.00501412	0.00128743	0.00126779	0.00226958	0.00512414	0.00391742	0.00116831	0.00670424	0	0.00170462	0.00312062	0.00297091	0.00193936	0.00413213	0.00299743	0.00145709	0	0.00352584	0.0021308	0.0030382	0.00201715	0.00246869	0.00720066	0.00671618	0.052527	0.00321148	0.0575501	0.0111817	0.00228162	0.00332828	0	0.0831021	0.0408371	0.105368	0.0310162	0.0168569	0.00908969	0	0.0129878	0.00865535	0.00143397	0.0306129	0.00615244
MQ-S2D	MQ-S2	0.00556903	0.000890908	0.012741	0.000983826	0.00471255	0.00183773	0.000570429	0.000830766	0.000978869	0.0081393	0.00471281	0	0.00224019	0.00116283	0.000969198	0.000455149	0.00550962	0.0025965	0.00599816	0.00104957	0.002013	0.00113873	0.00374422	0.00289113	0.000973527	0.00419227	0.00527672	0.00368605	0.00401114	0.0518597	0.00281369	0.0514186	0.0152013	0.00166189	0.00296942	0.0014166	0.0331773	0.0242437	0.20826	0.0249901	0.0159012	0.0110836	0.000765547	0.00340355	0.00257232	0.00140878	0.0464031	0.00408635
MQ-S2E	MQ-S2	0.00641594	0.000643364	0.015106	0.000967982	0.00618701	0.00190286	0.000659655	0.00113775	0.000617528	0.00750318	0.0045693	0.000367597	0.00302192	0.00126133	0	0.000513611	0.00584649	0.00157236	0.00500387	0.00056901	0.00188759	0.00178069	0.00437533	0.00288425	0.000594492	0.00304671	0.00451705	0.00292968	0.00342931	0.0569791	0.00230323	0.0458934	0.0157236	0.00159644	0.00269846	0.000814463	0.0221793	0.014019	0.183293	0.0193969	0.013005	0.0131229	0.000465639	0.00255613	0.00169607	0.000730628	0.0406219	0.00572779
MQ-S5A	MQ-S5	0.00998324	0.00223015	0.00706612	0.00473884	0.00910471	0.00657282	0.00195473	0.00125729	0.00581211	0.0103103	0.0092096	0.00591676	0.0099655	0.00196621	0.00772236	0.00280191	0.0094194	0.00480587	0.016595	0.025387	0.00208942	0.00986323	0.00503077	0.0196386	0.0297428	0.00368654	0.00536552	0.0555083	0.0268177	0.112794	0.00780856	0.0997877	0.0176718	0.00624045	0.00651682	0.00409964	0.290073	0.0736954	0.153995	0.0601201	0.0227496	0.0126007	0.00645221	0.0230777	0.0111993	0.00438566	0.0472088	0.0101018
MQ-S5C	MQ-S5	0.0107193	0.00197916	0.00784121	0.00361145	0.00981651	0.00731609	0.0027936	0.00128979	0.00481144	0.00500103	0.00583814	0.00332262	0.00963897	0.00121133	0.00581677	0.00402902	0.0053896	0.00268445	0.0106381	0.0134538	0.00159544	0.00620624	0.00454445	0.0126205	0.0167624	0.00360064	0.0036858	0.0332713	0.0243519	0.077069	0.00584613	0.057219	0.0121801	0.0041269	0.00362275	0.00261915	0.216951	0.0643276	0.111827	0.0363318	0.01325	0.0117492	0.00378562	0.0167651	0.0077834	0.00225324	0.036217	0.00513253
MQ-S5D	MQ-S5	0.00522218	0.00132605	0.0106157	0.00135967	0.00583618	0.00479247	0.00176864	0.00241997	0.00172225	0.00941907	0.00594838	0.000665272	0.00299926	0.00178954	0.00129346	0.00225299	0.00727072	0.00228073	0.00791488	0.00154032	0.00181855	0.000353714	0.00428887	0.00332124	0.0010412	0.00418193	0.00483725	0.00456821	0.00517271	0.0673184	0.0027146	0.0321675	0.0141073	0.00215348	0.00192161	0.00157788	0.0269401	0.0185945	0.178623	0.0165881	0.00616725	0.00753222	0.000934816	0.00171967	0.00122743	0.000996655	0.0313295	0.00534613
MQ-S5E	MQ-S5	0.00616357	0.00141177	0.0119296	0.00184273	0.00664567	0.00281344	0.000963281	0.00151014	0.00258324	0.0119524	0.00734225	0.000985354	0.00463406	0.00276901	0.00231939	0.00103232	0.00945355	0.00313625	0.00941202	0.0028822	0.00200906	0.00222209	0.00364169	0.00393462	0.00197292	0.00457792	0.00564948	0.00833991	0.00873758	0.0872149	0.00426015	0.044636	0.0176396	0.00378356	0.0031281	0.00237068	0.043604	0.0271398	0.221336	0.0303611	0.0102635	0.00998972	0.000988182	0.00295111	0.0018924	0.0013557	0.0367626	0.00394573
MQ-S5F	MQ-S5	0.00546495	0.00141233	0.00979576	0.00186186	0.00633613	0.00404342	0.00139457	0.00216897	0.00263457	0.0193791	0.00747776	0.000913156	0.00584286	0.00333176	0.00195025	0.00140969	0.00934374	0.00127889	0.0085434	0.00253465	0.00201497	0.000676159	0.00428044	0.00350283	0.00177307	0.00478322	0.00520425	0.00826309	0.00891735	0.0867283	0.00320697	0.0376837	0.0159161	0.00254528	0.00206497	0.00193524	0.0385123	0.0234643	0.201569	0.0218786	0.00767683	0.0090692	0.00122819	0.00264077	0.0020411	0.0012821	0.0338891	0.00630479
[truncated: 20 more columns]
