# Supplementary material for: The gut microbiome, single nucleotide polymorphisms, and differentially expressed genes promote aggression in an ant
Source: Research Square preprint supplement (doi:10.21203/rs.3.rs-8539228/v1), 2026-01-09
Supplement: Supplementary file 2 [file ForR_DNA_samples.xlsx]

## Sheet: samples109_
seq	id	nest	nest_internal	pop	pop_internal	beh	AI_worker	lat	lon	related_within_QG_prelim	queenNo_Pamilo
part2	52a	MQ-N1	S1	MQ-N	S	react_agg	-0.951807	46.7071	12.9275	0.455592	2
part2	57a	MQ-N1	S1	MQ-N	S	react_agg	-0.676471	46.7071	12.9275	0.455592	2
part2	60a	MQ-N1	S1	MQ-N	S	react_agg	3.55882	46.7071	12.9275	0.455592	2
part2	68b	MQ-N2	S2	MQ-N	S	react_agg	3.48101	46.7075	12.928	0.385048	2
part2	70a	MQ-N2	S2	MQ-N	S	react_agg	4	46.7075	12.928	0.385048	2
part2	116a	MQ-N2	S2	MQ-N	S	react_agg	2.96471	46.7075	12.928	0.385048	2
part2	117a	MQ-N2	S2	MQ-N	S	react_pcf	0.0178571	46.7075	12.928	0.385048	2
part2	207a	MQ-N5	S5	MQ-N	S	react_agg	3.64118	46.7098	12.9226	0.361215	2
part2	219a	MQ-N5	S5	MQ-N	S	react_agg	3.77246	46.7098	12.9226	0.361215	2
part2	222b	MQ-N5	S5	MQ-N	S	start_agg	3.97647	46.7098	12.9226	0.361215	2
part2	227a	MQ-N5	S5	MQ-N	S	start_agg	3.31765	46.7098	12.9226	0.361215	2
part2	235a	MQ-N5	S5	MQ-N	S	react_pcf	-0.338583	46.7098	12.9226	0.361215	2
part2	253b	MQ-N2	S2	MQ-N	S	react_agg	3.48824	46.7075	12.928	0.385048	2
part2	256b	MQ-N1	S1	MQ-N	S	react_pcf	1.01176	46.7071	12.9275	0.455592	2
part2	257a	MQ-N2	S2	MQ-N	S	react_agg	2.13125	46.7075	12.928	0.385048	2
part2	260a	MQ-N2	S2	MQ-N	S	react_pcf	-1.90179	46.7075	12.928	0.385048	2
part2	101a	MQ-N1	S1	MQ-N	S	start_agg	3.93529	46.7071	12.9275	0.455592	2
part2	399a	MQ-N1	S1	MQ-N	S	start_agg	3.81765	46.7071	12.9275	0.455592	2
part2	408a	MQ-N1	S1	MQ-N	S	start_agg	3.32353	46.7071	12.9275	0.455592	2
part2	446a	MQ-N1	S1	MQ-N	S	start_agg	3.75882	46.7071	12.9275	0.455592	2
part2	447a	MQ-N1	S1	MQ-N	S	start_agg	-0.947059	46.7071	12.9275	0.455592	2
part2	402b	MQ-N5	S5	MQ-N	S	start_agg	3.99412	46.7098	12.9226	0.361215	2
part2	551a	MQ-N5	S5	MQ-N	S	start_agg	3.25294	46.7098	12.9226	0.361215	2
part1	49a	MQ-N1	S1	MQ-N	S	start_agg	3.29762	46.7071	12.9275	0.455592	2
part1	50a	SQ-N1	N1	SQ-N	N	react_pcf	2	47.2191	11.0751	0.768002	1
part1	54a	SQ-A5	A5	SQ-A	A	react_pcf	0.982353	46.8144	11.4424	0.692969	1
part1	59a	SQ-A6	A6	SQ-A	A	react_pcf	-0.994118	46.8148	11.4427	0.727009	1
part1	125a	SQ-N1	N1	SQ-N	N	react_agg	2.16471	47.2191	11.0751	0.768002	1
part1	206a	SQ-N6	N6	SQ-N	N	start_agg	3.54706	47.2192	11.0766	0.770758	1
part1	217a	SQ-N6	N6	SQ-N	N	react_pcf	-0.1	47.2192	11.0766	0.770758	1
part1	218a	SQ-N6	N6	SQ-N	N	react_pcf	0.719008	47.2192	11.0766	0.770758	1
part1	226a	MQ-N5	S5	MQ-N	S	react_agg	3.44118	46.7098	12.9226	0.361215	2
part1	237a	MQ-N1	S1	MQ-N	S	react_pcf	0.958824	46.7071	12.9275	0.455592	2
part1	292a	SQ-N6	N6	SQ-N	N	react_agg	2.32624	47.2192	11.0766	0.770758	1
part1	294a	MQ-N1	S1	MQ-N	S	start_agg	3.29412	46.7071	12.9275	0.455592	2
part1	301a	SQ-N4	N4	SQ-N	N	start_agg	3.7	47.2193	11.0761	0.797124	1
part1	302a	SQ-N4	N4	SQ-N	N	react_agg	4	47.2193	11.0761	0.797124	1
part1	390a	MQ-N1	S1	MQ-N	S	start_agg	3.95294	46.7071	12.9275	0.455592	2
part1	391a	MQ-N5	S5	MQ-N	S	start_agg	3.51765	46.7098	12.9226	0.361215	2
part1	403a	SQ-A5	A5	SQ-A	A	start_agg	4	46.8144	11.4424	0.692969	1
part1	404a	SQ-A5	A5	SQ-A	A	start_agg	3.24118	46.8144	11.4424	0.692969	1
part1	405a	SQ-N1	N1	SQ-N	N	react_pcf	0.458647	47.2191	11.0751	0.768002	1
part1	435a	SQ-A2	A2	SQ-A	A	react_pcf	-0.394737	46.814	11.442	0.725104	1
part1	436a	MQ-N2	S2	MQ-N	S	start_agg	2.08696	46.7075	12.928	0.385048	2
part1	450a	SQ-N1	N1	SQ-N	N	react_pcf	0.840491	47.2191	11.0751	0.768002	1
part1	452a	SQ-N1	N1	SQ-N	N	react_pcf	-0.028777	47.2191	11.0751	0.768002	1
part1	459a	SQ-A6	A6	SQ-A	A	react_agg	3.75294	46.8148	11.4427	0.727009	1
part1	460a	SQ-A6	A6	SQ-A	A	react_agg	0.487952	46.8148	11.4427	0.727009	1
part1	547a	SQ-N6	N6	SQ-N	N	start_agg	3.62941	47.2192	11.0766	0.770758	1
part1	559a	SQ-N4	N4	SQ-N	N	start_agg	4	47.2193	11.0761	0.797124	1
part1	566a	SQ-A6	A6	SQ-A	A	start_agg	2.58824	46.8148	11.4427	0.727009	1
part1	567a	SQ-A6	A6	SQ-A	A	start_agg	-0.175325	46.8148	11.4427	0.727009	1
part1	620a	SQ-N6	N6	SQ-N	N	start_agg	3.00588	47.2192	11.0766	0.770758	1
part1	49b	SQ-A2	A2	SQ-A	A	react_pcf	-1.09467	46.814	11.442	0.725104	1
part1	50b	MQ-N2	S2	MQ-N	S	start_agg	3.44706	46.7075	12.928	0.385048	2
part1	59b	SQ-N1	N1	SQ-N	N	start_agg	3.96471	47.2191	11.0751	0.768002	1
part1	125b	MQ-N2	S2	MQ-N	S	start_agg	3.38235	46.7075	12.928	0.385048	2
part1	206b	SQ-A6	A6	SQ-A	A	react_pcf	0.40566	46.8148	11.4427	0.727009	1
part1	217b	SQ-A2	A2	SQ-A	A	start_agg	3.42857	46.814	11.442	0.725104	1
part1	218b	MQ-N1	S1	MQ-N	S	start_agg	3.85882	46.7071	12.9275	0.455592	2
part1	226b	SQ-N4	N4	SQ-N	N	start_agg	4	47.2193	11.0761	0.797124	1
part1	237b	SQ-N4	N4	SQ-N	N	start_agg	3.22353	47.2193	11.0761	0.797124	1
part1	292b	SQ-A2	A2	SQ-A	A	start_agg	-0.0597015	46.814	11.442	0.725104	1
part1	294b	SQ-N6	N6	SQ-N	N	react_agg	4	47.2192	11.0766	0.770758	1
part1	301b	SQ-A6	A6	SQ-A	A	react_agg	3.67647	46.8148	11.4427	0.727009	1
part1	302b	MQ-N5	S5	MQ-N	S	start_agg	4	46.7098	12.9226	0.361215	2
part1	390b	SQ-N6	N6	SQ-N	N	react_pcf	-0.589286	46.7071	12.9275	0.770758	1
part1	391b	SQ-N4	N4	SQ-N	N	react_agg	2.65031	47.2193	11.0761	0.797124	1
part1	403b	SQ-N1	N1	SQ-N	N	react_agg	4	47.2191	11.0751	0.768002	1
part1	404b	SQ-N1	N1	SQ-N	N	react_agg	3.81765	47.2191	11.0751	0.768002	1
part1	405b	SQ-A5	A5	SQ-A	A	start_agg	3.9	46.8144	11.4424	0.692969	1
part1	435b	MQ-N1	S1	MQ-N	S	start_agg	2.67066	46.7071	12.9275	0.455592	2
part1	436b	SQ-N1	N1	SQ-N	N	react_agg	3.16438	47.2191	11.0751	0.768002	1
part1	450b	SQ-A5	A5	SQ-A	A	start_agg	3.86982	46.8144	11.4424	0.692969	1
part1	452b	SQ-A5	A5	SQ-A	A	start_agg	2	46.8144	11.4424	0.692969	1
part1	459b	SQ-N4	N4	SQ-N	N	start_agg	4	47.2193	11.0761	0.797124	1
part1	460b	SQ-N4	N4	SQ-N	N	start_agg	1.03937	47.2193	11.0761	0.797124	1
part1	547b	SQ-A2	A2	SQ-A	A	react_agg	3.75882	46.814	11.442	0.725104	1
part1	559b	MQ-N5	S5	MQ-N	S	react_pcf	0.171053	46.7098	12.9226	0.361215	2
part1	566b	SQ-N4	N4	SQ-N	N	react_pcf	1.16216	47.2193	11.0761	0.797124	1
part1	567b	SQ-N4	N4	SQ-N	N	react_agg	3.62722	47.2193	11.0761	0.797124	1
part1	620b	MQ-N1	S1	MQ-N	S	react_agg	3.91765	46.7071	12.9275	0.455592	2
part1	101b	SQ-A6	A6	SQ-A	A	react_pcf	-1.29771	46.8148	11.4427	0.727009	1
part1	304a	MQ-N5	S5	MQ-N	S	react_pcf	-0.424242	46.7098	12.9226	0.361215	2
part1	363b	SQ-A6	A6	SQ-A	A	react_agg	0.579882	46.8148	11.4427	0.727009	1
part1	372b	SQ-A5	A5	SQ-A	A	start_agg	3.98824	46.8144	11.4424	0.692969	1
part1	376a	MQ-N2	S2	MQ-N	S	react_agg	2.54412	46.7075	12.928	0.385048	2
part1	382b	SQ-A5	A5	SQ-A	A	react_agg	3.86471	46.8144	11.4424	0.692969	1
part1	383a	MQ-N5	S5	MQ-N	S	react_pcf	-1.18621	46.7098	12.9226	0.361215	2
part1	385a	MQ-N5	S5	MQ-N	S	react_pcf	-1.18012	46.7098	12.9226	0.361215	2
part1	399b	SQ-A6	A6	SQ-A	A	react_agg	2.42941	46.8148	11.4427	0.727009	1
part1	402a	SQ-N1	N1	SQ-N	N	react_agg	3.54706	47.2191	11.0751	0.768002	1
part1	408b	SQ-A5	A5	SQ-A	A	react_agg	3.08824	46.8144	11.4424	0.692969	1
part1	410b	MQ-N1	S1	MQ-N	S	react_agg	2.03797	46.7071	12.9275	0.455592	2
part1	446b	SQ-A6	A6	SQ-A	A	react_pcf	-2	46.8148	11.4427	0.727009	1
part1	447b	SQ-A6	A6	SQ-A	A	react_agg	3.07059	46.8148	11.4427	0.727009	1
part1	454a	MQ-N1	S1	MQ-N	S	react_pcf	-1.27778	46.7071	12.9275	0.455592	2
part1	456a	SQ-A6	A6	SQ-A	A	react_agg	2.82941	46.8148	11.4427	0.727009	1
part1	497a	MQ-N2	S2	MQ-N	S	start_agg	3.52353	46.7075	12.928	0.385048	2
part1	501a	MQ-N2	S2	MQ-N	S	react_pcf	-1	46.7075	12.928	0.385048	2
part1	530b	SQ-A6	A6	SQ-A	A	react_agg	2.75	46.8148	11.4427	0.727009	1
part1	545b	MQ-N2	S2	MQ-N	S	react_agg	3.1875	46.7075	12.928	0.385048	2
part1	551b	SQ-A5	A5	SQ-A	A	react_agg	3.92941	46.8144	11.4424	0.692969	1
part1	554a	MQ-N5	S5	MQ-N	S	react_agg	-0.876471	46.7098	12.9226	0.361215	2
part1	584a	MQ-N1	S1	MQ-N	S	react_pcf	-1.96471	46.7071	12.9275	0.455592	2
part1	640b	SQ-A6	A6	SQ-A	A	react_agg	1.61789	46.8148	11.4427	0.727009	1
part1	641a	SQ-A6	A6	SQ-A	A	react_pcf	-0.724771	46.8148	11.4427	0.727009	1
part1	642b	MQ-N2	S2	MQ-N	S	react_pcf	-1.64179	46.7075	12.928	0.385048	2
part2	640a	MQ-N2	S2	MQ-N	S	start_agg	-1.52174	46.7075	12.928	0.385048	2

## Sheet: EnvironmentalVars
lat	lon	nest
46.7071	12.9275	MQ-N1
46.7071	12.9275	MQ-N1
46.7071	12.9275	MQ-N1
46.7075	12.928	MQ-N2
46.7075	12.928	MQ-N2
46.7075	12.928	MQ-N2
46.7075	12.928	MQ-N2
46.7098	12.9226	MQ-N5
46.7098	12.9226	MQ-N5
46.7098	12.9226	MQ-N5
46.7098	12.9226	MQ-N5
46.7098	12.9226	MQ-N5
46.7075	12.928	MQ-N2
46.7071	12.9275	MQ-N1
46.7075	12.928	MQ-N2
46.7075	12.928	MQ-N2
46.7071	12.9275	MQ-N1
46.7071	12.9275	MQ-N1
46.7071	12.9275	MQ-N1
46.7071	12.9275	MQ-N1
46.7071	12.9275	MQ-N1
46.7098	12.9226	MQ-N5
46.7098	12.9226	MQ-N5
46.7071	12.9275	MQ-N1
47.2191	11.0751	SQ-N1
46.8144	11.4424	SQ-A5
46.8148	11.4427	SQ-A6
47.2191	11.0751	SQ-N1
47.2192	11.0766	SQ-N6
47.2192	11.0766	SQ-N6
47.2192	11.0766	SQ-N6
46.7098	12.9226	MQ-N5
46.7071	12.9275	MQ-N1
47.2192	11.0766	SQ-N6
46.7071	12.9275	MQ-N1
47.2193	11.0761	SQ-N4
47.2193	11.0761	SQ-N4
46.7071	12.9275	MQ-N1
46.7098	12.9226	MQ-N5
46.8144	11.4424	SQ-A5
46.8144	11.4424	SQ-A5
47.2191	11.0751	SQ-N1
46.814	11.442	SQ-A2
46.7075	12.928	MQ-N2
47.2191	11.0751	SQ-N1
47.2191	11.0751	SQ-N1
46.8148	11.4427	SQ-A6
46.8148	11.4427	SQ-A6
47.2192	11.0766	SQ-N6
47.2193	11.0761	SQ-N4
46.8148	11.4427	SQ-A6
46.8148	11.4427	SQ-A6
47.2192	11.0766	SQ-N6
46.814	11.442	SQ-A2
46.7075	12.928	MQ-N2
47.2191	11.0751	SQ-N1
46.7075	12.928	MQ-N2
46.8148	11.4427	SQ-A6
46.814	11.442	SQ-A2
46.7071	12.9275	MQ-N1
47.2193	11.0761	SQ-N4
47.2193	11.0761	SQ-N4
46.814	11.442	SQ-A2
47.2192	11.0766	SQ-N6
46.8148	11.4427	SQ-A6
46.7098	12.9226	MQ-N5
46.7071	12.9275	SQ-N6
47.2193	11.0761	SQ-N4
47.2191	11.0751	SQ-N1
47.2191	11.0751	SQ-N1
46.8144	11.4424	SQ-A5
46.7071	12.9275	MQ-N1
47.2191	11.0751	SQ-N1
46.8144	11.4424	SQ-A5
46.8144	11.4424	SQ-A5
47.2193	11.0761	SQ-N4
47.2193	11.0761	SQ-N4
46.814	11.442	SQ-A2
46.7098	12.9226	MQ-N5
47.2193	11.0761	SQ-N4
47.2193	11.0761	SQ-N4
46.7071	12.9275	MQ-N1
46.8148	11.4427	SQ-A6
46.7098	12.9226	MQ-N5
46.8148	11.4427	SQ-A6
46.8144	11.4424	SQ-A5
46.7075	12.928	MQ-N2
46.8144	11.4424	SQ-A5
46.7098	12.9226	MQ-N5
46.7098	12.9226	MQ-N5
46.8148	11.4427	SQ-A6
47.2191	11.0751	SQ-N1
46.8144	11.4424	SQ-A5
46.7071	12.9275	MQ-N1
46.8148	11.4427	SQ-A6
46.8148	11.4427	SQ-A6
46.7071	12.9275	MQ-N1
46.8148	11.4427	SQ-A6
46.7075	12.928	MQ-N2
46.7075	12.928	MQ-N2
46.8148	11.4427	SQ-A6
46.7075	12.928	MQ-N2
46.8144	11.4424	SQ-A5
46.7098	12.9226	MQ-N5
46.7071	12.9275	MQ-N1
46.8148	11.4427	SQ-A6
46.8148	11.4427	SQ-A6
46.7075	12.928	MQ-N2
46.7075	12.928	MQ-N2
