# Supplementary material for: The gut microbiome, single nucleotide polymorphisms, and differentially expressed genes promote aggression in an ant
Source: Research Square preprint supplement (doi:10.21203/rs.3.rs-8539228/v1), 2026-01-09
Supplement: Supplementary file 3 [file ForR_GeneCounts.xlsx]

## Sheet: Sheet1
pop	nest	beh	MSTRG.5450	MSTRG.4267	MSTRG.5109	MSTRG.6709	MSTRG.7840	MSTRG.16119	MSTRG.15669	MSTRG.15080	MSTRG.4186	MSTRG.14246	MSTRG.12676	MSTRG.9806	MSTRG.13575	MSTRG.13555	elevation	related_within_QG_prelim	queenNo_Pamilo	soil_temperature	soil_humidity	nitrogen_soil	Precip_annual	Precip_WettestQuarter	Precip_DriestQuarter	Precip_WarmestQuarter	Precip_ColdestQuarter	Temp_meanYear	TempSeason	TempMax_WarmestMonth	TempMin_ColdestMonth	TAS	CHC_PC1	scaffold_11_2457277_coded	scaffold_163_28302_coded	scaffold_185_110741_coded	sample	nest_1	pop_1	strAgg_rctAgg	strAgg_rctPcf	rctAgg_rctPcf	scaffold_185_110741_	scaffold_163_28302_	scaffold_11_2457277_	scaffold_11_2457277	scaffold_163_28302	scaffold_185_110741	id
MQ-N	MQ-N1	start_agg	201	775	385	119	1	0	3748	4	1	2091	9	114	59	12	1654	0.456	2	18.6	13	4.23316	1124	405	171	405	180	3.6	6.47	18.2	-10	9.86068	0.074778	1	2	2	49a	S1	S	x	x		heterozygous	heterozygous	homozygous_ref	0/0	0/1	0/1	49a_S_S1
SQ-N	SQ-N1	react_pcf	228	679	408	154	1	1	2482	7	6	2138	6	3	41	12	1799	0.768	1			3.78318	1018	383	154	383	154	1.3	5.731	13.6	-9.5	8.40238	0.0246036	1	2	1	50a	N1	N		x	x	homozygous_ref	heterozygous	homozygous_ref	0/0	0/1	0/0	50a_N_N1
SQ-A	SQ-A5	react_pcf	139	394	284	97	0	0	3050	12	2	1448	9	0	24	5	1997	0.693	1	37.2	0.6	4.28853	1018	383	154	383	154	1.3	5.731	13.6	-9.5	7.40315	-0.103554	1	2	1	54a	A5	A		x	x	homozygous_ref	heterozygous	homozygous_ref	0/0	0/1	0/0	54a_A_A5
SQ-A	SQ-A6	react_pcf	144	518	285	162	0	2	5417	19	1	1858	9	5	23	11	1984	0.727	1	37.5	0.4	4.28853	1018	383	154	383	154	1.3	5.731	13.6	-9.5	7.4888	-0.0667884	1	2	1	59a	A6	A		x	x	homozygous_ref	heterozygous	homozygous_ref	0/0	0/1	0/0	59a_A_A6
SQ-N	SQ-N1	react_agg	157	531	277	93	0	0	2007	11	2	1302	4	0	26	6	1799	0.768	1			3.78318	1018	383	154	383	154	1.3	5.731	13.6	-9.5	8.40238	0.0246036	1	2	1	125a	N1	N	x		x	homozygous_ref	heterozygous	homozygous_ref	0/0	0/1	0/0	125a_N_N1
SQ-N	SQ-N6	start_agg	199	632	372	184	0	0	3491	8	3	2561	7	6	43	20	1811	0.771	1	25.1	4	3.78318	1018	383	154	383	154	1.3	5.731	13.6	-9.5	8.32314	0.0466543	1	1	1	206a	N6	N	x	x		homozygous_ref	homozygous_ref	homozygous_ref	0/0	0/0	0/0	206a_N_N6
SQ-N	SQ-N6	react_pcf	181	598	366	138	0	1	3695	6	3	2665	13	2	31	9	1811	0.771	1	25.1	4	3.78318	1018	383	154	383	154	1.3	5.731	13.6	-9.5	8.32314	0.0466543	1	1	1	217a	N6	N		x	x	homozygous_ref	homozygous_ref	homozygous_ref	0/0	0/0	0/0	217a_N_N6
SQ-N	SQ-N6	react_pcf	207	624	344	93	1	0	2585	9	5	1664	14	3	39	10	1811	0.771	1	25.1	4	3.78318	1018	383	154	383	154	1.3	5.731	13.6	-9.5	8.32314	0.0466543	1	2	1	218a	N6	N		x	x	homozygous_ref	heterozygous	homozygous_ref	0/0	0/1	0/0	218a_N_N6
MQ-N	MQ-N5	react_agg	220	774	535	172	2	1	5533	5	5	2999	11	29	44	18	1818	0.361	2	25.9	17.7	4.01178	1167	414	189	414	193	1.8	6.148	15.5	-10.6	8.77438	-0.01449	1	2	2	226a	S5	S	x		x	heterozygous	heterozygous	homozygous_ref	0/0	0/1	0/1	226a_S_S5
MQ-N	MQ-N1	react_pcf	281	929	584	209	56	1	3379	14	5	3517	9	458	74	27	1654	0.456	2	18.6	13	4.23316	1124	405	171	405	180	3.6	6.47	18.2	-10	9.86068	0.074778	1	2	1	237a	S1	S		x	x	homozygous_ref	heterozygous	homozygous_ref	0/0	0/1	0/0	237a_S_S1
SQ-N	SQ-N6	react_agg	280	982	450	153	0	0	9324	12	5	1752	9	4	61	23	1811	0.771	1	25.1	4	3.78318	1018	383	154	383	154	1.3	5.731	13.6	-9.5	8.32314	0.0466543	1	2	1	292a	N6	N	x		x	homozygous_ref	heterozygous	homozygous_ref	0/0	0/1	0/0	292a_N_N6
MQ-N	MQ-N1	start_agg	169	514	308	59	1	0	6501	3	2	926	2	295	31	8	1654	0.456	2	18.6	13	4.23316	1124	405	171	405	180	3.6	6.47	18.2	-10	9.86068	0.074778	1	2	1	294a	S1	S	x	x		homozygous_ref	heterozygous	homozygous_ref	0/0	0/1	0/0	294a_S_S1
SQ-N	SQ-N4	start_agg	257	846	482	82	2	1	2368	5	1	1693	8	2	51	14	1802	0.797	1	29	0.8	3.78318	1018	383	154	383	154	1.3	5.731	13.6	-9.5	8.38255	0.102926	1	1	1	301a	N4	N	x	x		homozygous_ref	homozygous_ref	homozygous_ref	0/0	0/0	0/0	301a_N_N4
SQ-N	SQ-N4	react_agg	386	1205	896	126	35	2	5299	10	7	2908	11	9	47	22	1802	0.797	1	29	0.8	3.78318	1018	383	154	383	154	1.3	5.731	13.6	-9.5	8.38255	0.102926	1	2	1	302a	N4	N	x		x	homozygous_ref	heterozygous	homozygous_ref	0/0	0/1	0/0	302a_N_N4
MQ-N	MQ-N1	start_agg	188	680	331	26	0	0	7015	7	2	629	4	80	64	10	1654	0.456	2	18.6	13	4.23316	1124	405	171	405	180	3.6	6.47	18.2	-10	9.86068	0.074778	1	2	2	390a	S1	S	x	x		heterozygous	heterozygous	homozygous_ref	0/0	0/1	0/1	390a_S_S1
MQ-N	MQ-N5	start_agg	125	468	289	48	0	1	3072	5	2	1004	10	1	29	11	1818	0.361	2	25.9	17.7	4.01178	1167	414	189	414	193	1.8	6.148	15.5	-10.6	8.77438	-0.01449	1	2	1	391a	S5	S	x	x		homozygous_ref	heterozygous	homozygous_ref	0/0	0/1	0/0	391a_S_S5
SQ-A	SQ-A5	start_agg	244	921	568	188	0	2	4575	8	1	2622	10	6	34	20	1997	0.693	1	37.2	0.6	4.28853	1018	383	154	383	154	1.3	5.731	13.6	-9.5	7.40315	-0.103554	1	1	1	403a	A5	A	x	x		homozygous_ref	homozygous_ref	homozygous_ref	0/0	0/0	0/0	403a_A_A5
SQ-A	SQ-A5	start_agg	216	738	418	108	0	3	4580	11	3	1772	6	9	30	13	1997	0.693	1	37.2	0.6	4.28853	1018	383	154	383	154	1.3	5.731	13.6	-9.5	7.40315	-0.103554	1	1	2	404a	A5	A	x	x		heterozygous	homozygous_ref	homozygous_ref	0/0	0/0	0/1	404a_A_A5
SQ-N	SQ-N1	react_pcf	143	485	256	40	8	3	5472	6	1	768	5	4	41	7	1799	0.768	1			3.78318	1018	383	154	383	154	1.3	5.731	13.6	-9.5	8.40238	0.0246036	1	2	1	405a	N1	N		x	x	homozygous_ref	heterozygous	homozygous_ref	0/0	0/1	0/0	405a_N_N1
SQ-A	SQ-A2	react_pcf	254	770	517	138	1	1	5137	22	4	2657	6	18	42	18	1956	0.725	1	29.2	6	4.28853	1018	383	154	383	154	1.3	5.731	13.6	-9.5	7.67438	-0.0918945	2	2	1	435a	A2	A		x	x	homozygous_ref	heterozygous	heterozygous	0/1	0/1	0/0	435a_A_A2
MQ-N	MQ-N2	start_agg	181	679	506	295	0	3	3008	6	7	3819	8	8	31	12	1672	0.385	2	19.2	19.2	4.23316	1124	405	171	405	180	3.6	6.47	18.2	-10	9.74143	0.0277652	2	1	2	436a	S2	S	x	x		heterozygous	homozygous_ref	heterozygous	0/1	0/0	0/1	436a_S_S2
SQ-N	SQ-N1	react_pcf	114	390	240	41	1	1	1973	11	0	724	4	4	19	4	1799	0.768	1			3.78318	1018	383	154	383	154	1.3	5.731	13.6	-9.5	8.40238	0.0246036	1	2	1	450a	N1	N		x	x	homozygous_ref	heterozygous	homozygous_ref	0/0	0/1	0/0	450a_N_N1
SQ-A	SQ-A6	react_agg	215	787	465	80	48	6	5874	16	3	1674	6	2	47	15	1984	0.727	1	37.5	0.4	4.28853	1018	383	154	383	154	1.3	5.731	13.6	-9.5	7.4888	-0.0667884	1	2	2	459a	A6	A	x		x	heterozygous	heterozygous	homozygous_ref	0/0	0/1	0/1	459a_A_A6
SQ-A	SQ-A6	react_agg	261	908	496	157	0	4	5499	22	4	1765	8	9	44	16	1984	0.727	1	37.5	0.4	4.28853	1018	383	154	383	154	1.3	5.731	13.6	-9.5	7.4888	-0.0667884	1	2	1	460a	A6	A	x		x	homozygous_ref	heterozygous	homozygous_ref	0/0	0/1	0/0	460a_A_A6
SQ-N	SQ-N6	start_agg	228	720	569	251	0	3	7740	18	2	3592	5	12	28	19	1811	0.771	1	25.1	4	3.78318	1018	383	154	383	154	1.3	5.731	13.6	-9.5	8.32314	0.0466543	1	2	1	547a	N6	N	x	x		homozygous_ref	heterozygous	homozygous_ref	0/0	0/1	0/0	547a_N_N6
SQ-N	SQ-N4	start_agg	275	861	578	203	0	3	6077	20	3	2677	9	7	53	22	1802	0.797	1	29	0.8	3.78318	1018	383	154	383	154	1.3	5.731	13.6	-9.5	8.38255	0.102926	1	1	2	559a	N4	N	x	x		heterozygous	homozygous_ref	homozygous_ref	0/0	0/0	0/1	559a_N_N4
SQ-A	SQ-A6	start_agg	345	1021	517	94	1	1	6950	31	7	1485	7	5	60	20	1984	0.727	1	37.5	0.4	4.28853	1018	383	154	383	154	1.3	5.731	13.6	-9.5	7.4888	-0.0667884	1	2	2	566a	A6	A	x	x		heterozygous	heterozygous	homozygous_ref	0/0	0/1	0/1	566a_A_A6
SQ-A	SQ-A6	start_agg	181	594	332	78	4	1	1951	17	1	1144	3	2	31	12	1984	0.727	1	37.5	0.4	4.28853	1018	383	154	383	154	1.3	5.731	13.6	-9.5	7.4888	-0.0667884	1	2	2	567a	A6	A	x	x		heterozygous	heterozygous	homozygous_ref	0/0	0/1	0/1	567a_A_A6
SQ-N	SQ-N6	start_agg	299	1157	736	132	2	2	5785	9	6	2605	11	7	48	24	1811	0.771	1	25.1	4	3.78318	1018	383	154	383	154	1.3	5.731	13.6	-9.5	8.32314	0.0466543	1	1	2	620a	N6	N	x	x		heterozygous	homozygous_ref	homozygous_ref	0/0	0/0	0/1	620a_N_N6
SQ-A	SQ-A2	react_pcf	280	855	588	150	0	1	6505	9	9	2537	16	6	38	13	1956	0.725	1	29.2	6	4.28853	1018	383	154	383	154	1.3	5.731	13.6	-9.5	7.67438	-0.0918945	1	2	1	49b	A2	A		x	x	homozygous_ref	heterozygous	homozygous_ref	0/0	0/1	0/0	49b_A_A2
MQ-N	MQ-N2	start_agg	192	704	456	143	1	0	2065	8	2	2485	7	2	46	28	1672	0.385	2	19.2	19.2	4.23316	1124	405	171	405	180	3.6	6.47	18.2	-10	9.74143	0.0277652	1	2	2	50b	S2	S	x	x		heterozygous	heterozygous	homozygous_ref	0/0	0/1	0/1	50b_S_S2
MQ-N	MQ-N2	start_agg	229	793	639	171	0	1	4299	7	6	3361	10	5	43	27	1672	0.385	2	19.2	19.2	4.23316	1124	405	171	405	180	3.6	6.47	18.2	-10	9.74143	0.0277652	1	2	2	125b	S2	S	x	x		heterozygous	heterozygous	homozygous_ref	0/0	0/1	0/1	125b_S_S2
SQ-A	SQ-A6	react_pcf	185	687	423	212	4	1	5676	18	4	2382	10	6	22	18	1984	0.727	1	37.5	0.4	4.28853	1018	383	154	383	154	1.3	5.731	13.6	-9.5	7.4888	-0.0667884	2	2	1	206b	A6	A		x	x	homozygous_ref	heterozygous	heterozygous	0/1	0/1	0/0	206b_A_A6
SQ-A	SQ-A2	start_agg	223	802	519	76	2	1	2619	14	5	2089	8	0	46	18	1956	0.725	1	29.2	6	4.28853	1018	383	154	383	154	1.3	5.731	13.6	-9.5	7.67438	-0.0918945	1	2	2	217b	A2	A	x	x		heterozygous	heterozygous	homozygous_ref	0/0	0/1	0/1	217b_A_A2
MQ-N	MQ-N1	start_agg	236	919	530	88	2	1	3520	15	3	1845	4	473	60	19	1654	0.456	2	18.6	13	4.23316	1124	405	171	405	180	3.6	6.47	18.2	-10	9.86068	0.074778	2	2	2	218b	S1	S	x	x		heterozygous	heterozygous	heterozygous	0/1	0/1	0/1	218b_S_S1
SQ-N	SQ-N4	start_agg	284	941	564	182	7	2	4033	6	6	2650	3	7	54	18	1802	0.797	1	29	0.8	3.78318	1018	383	154	383	154	1.3	5.731	13.6	-9.5	8.38255	0.102926	1	2	2	226b	N4	N	x	x		heterozygous	heterozygous	homozygous_ref	0/0	0/1	0/1	226b_N_N4
SQ-N	SQ-N4	start_agg	135	453	341	109	2	0	2863	7	2	1534	6	5	25	12	1802	0.797	1	29	0.8	3.78318	1018	383	154	383	154	1.3	5.731	13.6	-9.5	8.38255	0.102926	1	1	2	237b	N4	N	x	x		heterozygous	homozygous_ref	homozygous_ref	0/0	0/0	0/1	237b_N_N4
SQ-A	SQ-A2	start_agg	263	801	485	70	2	0	2658	10	3	1418	10	5	39	23	1956	0.725	1	29.2	6	4.28853	1018	383	154	383	154	1.3	5.731	13.6	-9.5	7.67438	-0.0918945	1	2	2	292b	A2	A	x	x		heterozygous	heterozygous	homozygous_ref	0/0	0/1	0/1	292b_A_A2
SQ-N	SQ-N6	react_agg	240	736	417	101	0	0	2534	9	6	1932	4	3	32	27	1811	0.771	1	25.1	4	3.78318	1018	383	154	383	154	1.3	5.731	13.6	-9.5	8.32314	0.0466543	1	2	1	294b	N6	N	x		x	homozygous_ref	heterozygous	homozygous_ref	0/0	0/1	0/0	294b_N_N6
SQ-A	SQ-A6	react_agg	244	793	339	66	2	2	5521	14	1	1069	10	4	21	15	1984	0.727	1	37.5	0.4	4.28853	1018	383	154	383	154	1.3	5.731	13.6	-9.5	7.4888	-0.0667884	2	2	1	301b	A6	A	x		x	homozygous_ref	heterozygous	heterozygous	0/1	0/1	0/0	301b_A_A6
MQ-N	MQ-N5	start_agg	236	751	415	93	0	2	2122	8	3	1551	7	14	62	17	1818	0.361	2	25.9	17.7	4.01178	1167	414	189	414	193	1.8	6.148	15.5	-10.6	8.77438	-0.01449	1	1	2	302b	S5	S	x	x		heterozygous	homozygous_ref	homozygous_ref	0/0	0/0	0/1	302b_S_S5
SQ-N	SQ-N6	react_pcf	258	931	689	276	3	4	5725	12	7	4359	14	5	54	8	1654	0.771	1	25.1	4	3.78318	1018	383	154	383	154	1.3	5.731	13.6	-9.5	9.86068	0.0466543	1	2	2	390b	N6	N		x	x	heterozygous	heterozygous	homozygous_ref	0/0	0/1	0/1	390b_N_N6
SQ-N	SQ-N1	react_agg	217	773	414	123	6	6	6657	21	3	1832	6	3	48	13	1799	0.768	1			3.78318	1018	383	154	383	154	1.3	5.731	13.6	-9.5	8.40238	0.0246036	1	2	1	403b	N1	N	x		x	homozygous_ref	heterozygous	homozygous_ref	0/0	0/1	0/0	403b_N_N1
SQ-N	SQ-N1	react_agg	247	930	633	214	4	10	4037	24	5	3113	11	11	40	22	1799	0.768	1			3.78318	1018	383	154	383	154	1.3	5.731	13.6	-9.5	8.40238	0.0246036	1	2	1	404b	N1	N	x		x	homozygous_ref	heterozygous	homozygous_ref	0/0	0/1	0/0	404b_N_N1
SQ-A	SQ-A5	start_agg	824	2788	1494	297	0	1	12294	47	6	4591	26	13	131	35	1997	0.693	1	37.2	0.6	4.28853	1018	383	154	383	154	1.3	5.731	13.6	-9.5	7.40315	-0.103554	1	1	1	405b	A5	A	x	x		homozygous_ref	homozygous_ref	homozygous_ref	0/0	0/0	0/0	405b_A_A5
MQ-N	MQ-N1	start_agg	175	499	349	249	0	0	3084	8	6	2886	2	643	35	12	1654	0.456	2	18.6	13	4.23316	1124	405	171	405	180	3.6	6.47	18.2	-10	9.86068	0.074778	2	1	1	435b	S1	S	x	x		homozygous_ref	homozygous_ref	heterozygous	0/1	0/0	0/0	435b_S_S1
SQ-N	SQ-N1	react_agg	298	1182	660	93	2	7	16678	18	4	1790	8	9	72	29	1799	0.768	1			3.78318	1018	383	154	383	154	1.3	5.731	13.6	-9.5	8.40238	0.0246036	1	2	1	436b	N1	N	x		x	homozygous_ref	heterozygous	homozygous_ref	0/0	0/1	0/0	436b_N_N1
SQ-A	SQ-A5	start_agg	285	965	697	136	0	2	3558	15	1	2468	9	3	41	20	1997	0.693	1	37.2	0.6	4.28853	1018	383	154	383	154	1.3	5.731	13.6	-9.5	7.40315	-0.103554	1	1	1	450b	A5	A	x	x		homozygous_ref	homozygous_ref	homozygous_ref	0/0	0/0	0/0	450b_A_A5
SQ-A	SQ-A5	start_agg	172	600	403	135	0	1	2003	10	2	1993	4	5	36	14	1997	0.693	1	37.2	0.6	4.28853	1018	383	154	383	154	1.3	5.731	13.6	-9.5	7.40315	-0.103554	1	1	2	452b	A5	A	x	x		heterozygous	homozygous_ref	homozygous_ref	0/0	0/0	0/1	452b_A_A5
SQ-N	SQ-N4	start_agg	218	807	503	86	0	3	2887	9	2	2049	2	8	24	19	1802	0.797	1	29	0.8	3.78318	1018	383	154	383	154	1.3	5.731	13.6	-9.5	8.38255	0.102926	1	2	2	459b	N4	N	x	x		heterozygous	heterozygous	homozygous_ref	0/0	0/1	0/1	459b_N_N4
SQ-N	SQ-N4	start_agg	202	529	381	144	0	1	2798	8	4	2160	3	7	40	7	1802	0.797	1	29	0.8	3.78318	1018	383	154	383	154	1.3	5.731	13.6	-9.5	8.38255	0.102926	1	1	2	460b	N4	N	x	x		heterozygous	homozygous_ref	homozygous_ref	0/0	0/0	0/1	460b_N_N4
SQ-A	SQ-A2	react_agg	350	1158	807	485	3	7	10514	42	4	5163	15	27	44	28	1956	0.725	1	29.2	6	4.28853	1018	383	154	383	154	1.3	5.731	13.6	-9.5	7.67438	-0.0918945	1	1	2	547b	A2	A	x		x	heterozygous	homozygous_ref	homozygous_ref	0/0	0/0	0/1	547b_A_A2
MQ-N	MQ-N5	react_pcf	177	576	442	223	0	2	2117	9	7	3298	6	19	33	17	1818	0.361	2	25.9	17.7	4.01178	1167	414	189	414	193	1.8	6.148	15.5	-10.6	8.77438	-0.01449	1	2	1	559b	S5	S		x	x	homozygous_ref	heterozygous	homozygous_ref	0/0	0/1	0/0	559b_S_S5
SQ-N	SQ-N4	react_pcf	182	566	472	261	1	2	4413	16	10	3845	7	13	22	12	1802	0.797	1	29	0.8	3.78318	1018	383	154	383	154	1.3	5.731	13.6	-9.5	8.38255	0.102926	1	2	1	566b	N4	N		x	x	homozygous_ref	heterozygous	homozygous_ref	0/0	0/1	0/0	566b_N_N4
SQ-N	SQ-N4	react_agg	274	1009	715	143	26	4	5455	28	3	2941	5	14	48	13	1802	0.797	1	29	0.8	3.78318	1018	383	154	383	154	1.3	5.731	13.6	-9.5	8.38255	0.102926	1	2	1	567b	N4	N	x		x	homozygous_ref	heterozygous	homozygous_ref	0/0	0/1	0/0	567b_N_N4
MQ-N	MQ-N1	react_agg	1217	4151	3269	2002	9	14	25279	72	29	26718	49	522	206	112	1654	0.456	2	18.6	13	4.23316	1124	405	171	405	180	3.6	6.47	18.2	-10	9.86068	0.074778	1	2	1	620b	S1	S	x		x	homozygous_ref	heterozygous	homozygous_ref	0/0	0/1	0/0	620b_S_S1
SQ-A	SQ-A6	react_pcf	344	1020	650	339	5	3	25638	54	14	5270	16	15	52	15	1984	0.727	1	37.5	0.4	4.28853	1018	383	154	383	154	1.3	5.731	13.6	-9.5	7.4888	-0.0667884	1	2	2	101b	A6	A		x	x	heterozygous	heterozygous	homozygous_ref	0/0	0/1	0/1	101b_A_A6
MQ-N	MQ-N5	react_pcf	653	2473	1680	1284	40	17	41003	52	32	19726	37	110	145	38	1818	0.361	2	25.9	17.7	4.01178	1167	414	189	414	193	1.8	6.148	15.5	-10.6	8.77438	-0.01449	1	2	2	304a	S5	S		x	x	heterozygous	heterozygous	homozygous_ref	0/0	0/1	0/1	304a_S_S5
SQ-A	SQ-A6	react_agg	441	1987	966	733	1	6	33331	89	19	6864	22	40	42	35	1984	0.727	1	37.5	0.4	4.28853	1018	383	154	383	154	1.3	5.731	13.6	-9.5	7.4888	-0.0667884	1	2	1	363b	A6	A	x		x	homozygous_ref	heterozygous	homozygous_ref	0/0	0/1	0/0	363b_A_A6
SQ-A	SQ-A5	start_agg	419	1672	1056	777	2	10	43560	48	18	9197	23	19	55	40	1997	0.693	1	37.2	0.6	4.28853	1018	383	154	383	154	1.3	5.731	13.6	-9.5	7.40315	-0.103554	1	1	1	372b	A5	A	x	x		homozygous_ref	homozygous_ref	homozygous_ref	0/0	0/0	0/0	372b_A_A5
MQ-N	MQ-N2	react_agg	630	2228	1673	1062	0	19	29932	38	32	15810	35	59	129	49	1672	0.385	2	19.2	19.2	4.23316	1124	405	171	405	180	3.6	6.47	18.2	-10	9.74143	0.0277652	2	2	2	376a	S2	S	x		x	heterozygous	heterozygous	heterozygous	0/1	0/1	0/1	376a_S_S2
SQ-A	SQ-A5	react_agg	577	2069	1264	813	6	15	35540	32	24	9564	25	30	70	60	1997	0.693	1	37.2	0.6	4.28853	1018	383	154	383	154	1.3	5.731	13.6	-9.5	7.40315	-0.103554	1	2	1	382b	A5	A	x		x	homozygous_ref	heterozygous	homozygous_ref	0/0	0/1	0/0	382b_A_A5
MQ-N	MQ-N5	react_pcf	176	575	386	798	0	1	16020	0	0	5992	10	79	77	3	1818	0.361	2	25.9	17.7	4.01178	1167	414	189	414	193	1.8	6.148	15.5	-10.6	8.77438	-0.01449	1	2	1	385a	S5	S		x	x	homozygous_ref	heterozygous	homozygous_ref	0/0	0/1	0/0	385a_S_S5
SQ-A	SQ-A6	react_agg	462	1677	1008	1264	0	10	32077	56	19	10986	21	40	115	39	1984	0.727	1	37.5	0.4	4.28853	1018	383	154	383	154	1.3	5.731	13.6	-9.5	7.4888	-0.0667884	1	2	1	399b	A6	A	x		x	homozygous_ref	heterozygous	homozygous_ref	0/0	0/1	0/0	399b_A_A6
SQ-A	SQ-A5	react_agg	423	1392	841	693	4	12	24180	39	13	8568	26	30	71	32	1997	0.693	1	37.2	0.6	4.28853	1018	383	154	383	154	1.3	5.731	13.6	-9.5	7.40315	-0.103554	1	2	2	408b	A5	A	x		x	heterozygous	heterozygous	homozygous_ref	0/0	0/1	0/1	408b_A_A5
MQ-N	MQ-N1	react_agg	142	681	568	1817	2	15	20785	19	17	14956	20	882	25	28	1654	0.456	2	18.6	13	4.23316	1124	405	171	405	180	3.6	6.47	18.2	-10	9.86068	0.074778	2	2	1	410b	S1	S	x		x	homozygous_ref	heterozygous	heterozygous	0/1	0/1	0/0	410b_S_S1
SQ-A	SQ-A6	react_pcf	450	1468	863	575	1	8	20730	49	35	10183	22	16	59	31	1984	0.727	1	37.5	0.4	4.28853	1018	383	154	383	154	1.3	5.731	13.6	-9.5	7.4888	-0.0667884	1	2	2	446b	A6	A		x	x	heterozygous	heterozygous	homozygous_ref	0/0	0/1	0/1	446b_A_A6
SQ-A	SQ-A6	react_agg	465	1710	974	429	0	7	21275	65	24	6796	26	20	59	25	1984	0.727	1	37.5	0.4	4.28853	1018	383	154	383	154	1.3	5.731	13.6	-9.5	7.4888	-0.0667884	1	2	1	447b	A6	A	x		x	homozygous_ref	heterozygous	homozygous_ref	0/0	0/1	0/0	447b_A_A6
MQ-N	MQ-N1	react_pcf	364	1408	846	434	1	3	22302	44	24	6894	18	517	63	22	1654	0.456	2	18.6	13	4.23316	1124	405	171	405	180	3.6	6.47	18.2	-10	9.86068	0.074778	1	2	1	454a	S1	S		x	x	homozygous_ref	heterozygous	homozygous_ref	0/0	0/1	0/0	454a_S_S1
SQ-A	SQ-A6	react_agg	526	1674	994	812	0	11	52992	90	17	8233	29	32	71	30	1984	0.727	1	37.5	0.4	4.28853	1018	383	154	383	154	1.3	5.731	13.6	-9.5	7.4888	-0.0667884	1	2	1	456a	A6	A	x		x	homozygous_ref	heterozygous	homozygous_ref	0/0	0/1	0/0	456a_A_A6
MQ-N	MQ-N2	start_agg	649	2471	2039	1373	0	15	49956	62	26	19078	38	272	143	66	1672	0.385	2	19.2	19.2	4.23316	1124	405	171	405	180	3.6	6.47	18.2	-10	9.74143	0.0277652	1	2	2	497a	S2	S	x	x		heterozygous	heterozygous	homozygous_ref	0/0	0/1	0/1	497a_S_S2
MQ-N	MQ-N2	react_pcf	572	2434	1689	995	1	8	31744	37	26	13432	44	179	104	54	1672	0.385	2	19.2	19.2	4.23316	1124	405	171	405	180	3.6	6.47	18.2	-10	9.74143	0.0277652	1	1	2	501a	S2	S		x	x	heterozygous	homozygous_ref	homozygous_ref	0/0	0/0	0/1	501a_S_S2
SQ-A	SQ-A6	react_agg	514	1889	1196	919	208	6	44299	90	25	12972	37	29	47	36	1984	0.727	1	37.5	0.4	4.28853	1018	383	154	383	154	1.3	5.731	13.6	-9.5	7.4888	-0.0667884	1	2	1	530b	A6	A	x		x	homozygous_ref	heterozygous	homozygous_ref	0/0	0/1	0/0	530b_A_A6
MQ-N	MQ-N2	react_agg	174	711	598	553	0	0	56492	91	0	11519	178	11	25	1	1672	0.385	2	19.2	19.2	4.23316	1124	405	171	405	180	3.6	6.47	18.2	-10	9.74143	0.0277652	1	2	1	545b	S2	S	x		x	homozygous_ref	heterozygous	homozygous_ref	0/0	0/1	0/0	545b_S_S2
SQ-A	SQ-A5	react_agg	606	2218	1494	1044	128	11	39391	60	39	13170	32	43	92	55	1997	0.693	1	37.2	0.6	4.28853	1018	383	154	383	154	1.3	5.731	13.6	-9.5	7.40315	-0.103554	1	2	1	551b	A5	A	x		x	homozygous_ref	heterozygous	homozygous_ref	0/0	0/1	0/0	551b_A_A5
MQ-N	MQ-N5	react_agg	561	2002	1342	1164	0	7	59221	30	32	15447	27	77	70	45	1818	0.361	2	25.9	17.7	4.01178	1167	414	189	414	193	1.8	6.148	15.5	-10.6	8.77438	-0.01449	1	2	1	554a	S5	S	x		x	homozygous_ref	heterozygous	homozygous_ref	0/0	0/1	0/0	554a_S_S5
MQ-N	MQ-N1	react_pcf	691	2666	1718	1600	3	8	65264	48	35	21108	36	2219	151	54	1654	0.456	2	18.6	13	4.23316	1124	405	171	405	180	3.6	6.47	18.2	-10	9.86068	0.074778	1	2	2	584a	S1	S		x	x	heterozygous	heterozygous	homozygous_ref	0/0	0/1	0/1	584a_S_S1
SQ-A	SQ-A6	react_agg	571	1500	1039	804	2	18	72345	41	6	8655	32	30	75	35	1984	0.727	1	37.5	0.4	4.28853	1018	383	154	383	154	1.3	5.731	13.6	-9.5	7.4888	-0.0667884	1	2	1	640b	A6	A	x		x	homozygous_ref	heterozygous	homozygous_ref	0/0	0/1	0/0	640b_A_A6
SQ-A	SQ-A6	react_pcf	525	1514	885	568	3	12	43359	67	16	8580	23	28	58	17	1984	0.727	1	37.5	0.4	4.28853	1018	383	154	383	154	1.3	5.731	13.6	-9.5	7.4888	-0.0667884	1	2	1	641a	A6	A		x	x	homozygous_ref	heterozygous	homozygous_ref	0/0	0/1	0/0	641a_A_A6
MQ-N	MQ-N2	react_pcf	578	2232	1763	2446	134	17	24635	53	49	30798	60	39	101	63	1672	0.385	2	19.2	19.2	4.23316	1124	405	171	405	180	3.6	6.47	18.2	-10	9.74143	0.0277652	1	2	1	642b	S2	S		x	x	homozygous_ref	heterozygous	homozygous_ref	0/0	0/1	0/0	642b_S_S2
SQ-N	SQ-N1	start_agg	655	2041	1125	234	0	8	11314	46	4	5017	18	12	166	51	1799	0.768	1			3.78318	1018	383	154	383	154	1.3	5.731	13.6	-9.5	8.40238	0.0246036	1	2	2	59b	N1	N	x	x		heterozygous	heterozygous	homozygous_ref	0/0	0/1	0/1	59b_N_N1_pooled
SQ-N	SQ-N4	react_agg	273	782	584	296	3	6	9913	26	11	4536	11	10	52	15	1802	0.797	1	29	0.8	3.78318	1018	383	154	383	154	1.3	5.731	13.6	-9.5	8.38255	0.102926	1	2	1	391b	N4	N	x		x	homozygous_ref	heterozygous	homozygous_ref	0/0	0/1	0/0	391b_N_N4
[truncated: 4 more columns]
