# Supplementary material for: The gut microbiome, single nucleotide polymorphisms, and differentially expressed genes promote aggression in an ant
Source: Research Square preprint supplement (doi:10.21203/rs.3.rs-8539228/v1), 2026-01-09
Supplement: Supplementary file 4 [file ForR_GeneCounts_final.xlsx]

## Sheet: Sheet1
pop	nest	beh	scaffold_163_28302_coded	scaffold_185_110741_coded	MSTRG.6709	MSTRG.7840	MSTRG.16119	MSTRG.15669	MSTRG.15080	MSTRG.4186	MSTRG.14246	MSTRG.12676	interal_ID	interal_ID1
MQ-N	MQ-N1	start_agg	2	2	119	1	0	3748	4	1	2091	9	49a_S_S1	49a
SQ-N	SQ-N1	react_pcf	2	1	154	1	1	2482	7	6	2138	6	50a_N_N1	50a
SQ-A	SQ-A5	react_pcf	2	1	97	0	0	3050	12	2	1448	9	54a_A_A5	54a
SQ-A	SQ-A6	react_pcf	2	1	162	0	2	5417	19	1	1858	9	59a_A_A6	59a
SQ-N	SQ-N1	react_agg	2	1	93	0	0	2007	11	2	1302	4	125a_N_N1	125a
SQ-N	SQ-N6	start_agg	1	1	184	0	0	3491	8	3	2561	7	206a_N_N6	206a
SQ-N	SQ-N6	react_pcf	1	1	138	0	1	3695	6	3	2665	13	217a_N_N6	217a
SQ-N	SQ-N6	react_pcf	2	1	93	1	0	2585	9	5	1664	14	218a_N_N6	218a
MQ-N	MQ-N5	react_agg	2	2	172	2	1	5533	5	5	2999	11	226a_S_S5	226a
MQ-N	MQ-N1	react_pcf	2	1	209	56	1	3379	14	5	3517	9	237a_S_S1	237a
SQ-N	SQ-N6	react_agg	2	1	153	0	0	9324	12	5	1752	9	292a_N_N6	292a
MQ-N	MQ-N1	start_agg	2	1	59	1	0	6501	3	2	926	2	294a_S_S1	294a
SQ-N	SQ-N4	start_agg	1	1	82	2	1	2368	5	1	1693	8	301a_N_N4	301a
SQ-N	SQ-N4	react_agg	2	1	126	35	2	5299	10	7	2908	11	302a_N_N4	302a
MQ-N	MQ-N1	start_agg	2	2	26	0	0	7015	7	2	629	4	390a_S_S1	390a
MQ-N	MQ-N5	start_agg	2	1	48	0	1	3072	5	2	1004	10	391a_S_S5	391a
SQ-A	SQ-A5	start_agg	1	1	188	0	2	4575	8	1	2622	10	403a_A_A5	403a
SQ-A	SQ-A5	start_agg	1	2	108	0	3	4580	11	3	1772	6	404a_A_A5	404a
SQ-N	SQ-N1	react_pcf	2	1	40	8	3	5472	6	1	768	5	405a_N_N1	405a
SQ-A	SQ-A2	react_pcf	2	1	138	1	1	5137	22	4	2657	6	435a_A_A2	435a
MQ-N	MQ-N2	start_agg	1	2	295	0	3	3008	6	7	3819	8	436a_S_S2	436a
SQ-N	SQ-N1	react_pcf	2	1	41	1	1	1973	11	0	724	4	450a_N_N1	450a
SQ-A	SQ-A6	react_agg	2	2	80	48	6	5874	16	3	1674	6	459a_A_A6	459a
SQ-A	SQ-A6	react_agg	2	1	157	0	4	5499	22	4	1765	8	460a_A_A6	460a
SQ-N	SQ-N6	start_agg	2	1	251	0	3	7740	18	2	3592	5	547a_N_N6	547a
SQ-N	SQ-N4	start_agg	1	2	203	0	3	6077	20	3	2677	9	559a_N_N4	559a
SQ-A	SQ-A6	start_agg	2	2	94	1	1	6950	31	7	1485	7	566a_A_A6	566a
SQ-A	SQ-A6	start_agg	2	2	78	4	1	1951	17	1	1144	3	567a_A_A6	567a
SQ-N	SQ-N6	start_agg	1	2	132	2	2	5785	9	6	2605	11	620a_N_N6	620a
SQ-A	SQ-A2	react_pcf	2	1	150	0	1	6505	9	9	2537	16	49b_A_A2	49b
MQ-N	MQ-N2	start_agg	2	2	143	1	0	2065	8	2	2485	7	50b_S_S2	50b
MQ-N	MQ-N2	start_agg	2	2	171	0	1	4299	7	6	3361	10	125b_S_S2	125b
SQ-A	SQ-A6	react_pcf	2	1	212	4	1	5676	18	4	2382	10	206b_A_A6	206b
SQ-A	SQ-A2	start_agg	2	2	76	2	1	2619	14	5	2089	8	217b_A_A2	217b
MQ-N	MQ-N1	start_agg	2	2	88	2	1	3520	15	3	1845	4	218b_S_S1	218b
SQ-N	SQ-N4	start_agg	2	2	182	7	2	4033	6	6	2650	3	226b_N_N4	226b
SQ-N	SQ-N4	start_agg	1	2	109	2	0	2863	7	2	1534	6	237b_N_N4	237b
SQ-A	SQ-A2	start_agg	2	2	70	2	0	2658	10	3	1418	10	292b_A_A2	292b
SQ-N	SQ-N6	react_agg	2	1	101	0	0	2534	9	6	1932	4	294b_N_N6	294b
SQ-A	SQ-A6	react_agg	2	1	66	2	2	5521	14	1	1069	10	301b_A_A6	301b
MQ-N	MQ-N5	start_agg	1	2	93	0	2	2122	8	3	1551	7	302b_S_S5	302b
SQ-N	SQ-N6	react_pcf	2	2	276	3	4	5725	12	7	4359	14	390b_N_N6	390b
SQ-N	SQ-N1	react_agg	2	1	123	6	6	6657	21	3	1832	6	403b_N_N1	403b
SQ-N	SQ-N1	react_agg	2	1	214	4	10	4037	24	5	3113	11	404b_N_N1	404b
SQ-A	SQ-A5	start_agg	1	1	297	0	1	12294	47	6	4591	26	405b_A_A5	405b
MQ-N	MQ-N1	start_agg	1	1	249	0	0	3084	8	6	2886	2	435b_S_S1	435b
SQ-N	SQ-N1	react_agg	2	1	93	2	7	16678	18	4	1790	8	436b_N_N1	436b
SQ-A	SQ-A5	start_agg	1	1	136	0	2	3558	15	1	2468	9	450b_A_A5	450b
SQ-A	SQ-A5	start_agg	1	2	135	0	1	2003	10	2	1993	4	452b_A_A5	452b
SQ-N	SQ-N4	start_agg	2	2	86	0	3	2887	9	2	2049	2	459b_N_N4	459b
SQ-N	SQ-N4	start_agg	1	2	144	0	1	2798	8	4	2160	3	460b_N_N4	460b
SQ-A	SQ-A2	react_agg	1	2	485	3	7	10514	42	4	5163	15	547b_A_A2	547b
MQ-N	MQ-N5	react_pcf	2	1	223	0	2	2117	9	7	3298	6	559b_S_S5	559b
SQ-N	SQ-N4	react_pcf	2	1	261	1	2	4413	16	10	3845	7	566b_N_N4	566b
SQ-N	SQ-N4	react_agg	2	1	143	26	4	5455	28	3	2941	5	567b_N_N4	567b
MQ-N	MQ-N1	react_agg	2	1	2002	9	14	25279	72	29	26718	49	620b_S_S1	620b
SQ-A	SQ-A6	react_pcf	2	2	339	5	3	25638	54	14	5270	16	101b_A_A6	101b
MQ-N	MQ-N5	react_pcf	2	2	1284	40	17	41003	52	32	19726	37	304a_S_S5	304a
SQ-A	SQ-A6	react_agg	2	1	733	1	6	33331	89	19	6864	22	363b_A_A6	363b
SQ-A	SQ-A5	start_agg	1	1	777	2	10	43560	48	18	9197	23	372b_A_A5	372b
MQ-N	MQ-N2	react_agg	2	2	1062	0	19	29932	38	32	15810	35	376a_S_S2	376a
SQ-A	SQ-A5	react_agg	2	1	813	6	15	35540	32	24	9564	25	382b_A_A5	382b
MQ-N	MQ-N5	react_pcf	2	1	798	0	1	16020	0	0	5992	10	385a_S_S5	385a
SQ-A	SQ-A6	react_agg	2	1	1264	0	10	32077	56	19	10986	21	399b_A_A6	399b
SQ-A	SQ-A5	react_agg	2	2	693	4	12	24180	39	13	8568	26	408b_A_A5	408b
MQ-N	MQ-N1	react_agg	2	1	1817	2	15	20785	19	17	14956	20	410b_S_S1	410b
SQ-A	SQ-A6	react_pcf	2	2	575	1	8	20730	49	35	10183	22	446b_A_A6	446b
SQ-A	SQ-A6	react_agg	2	1	429	0	7	21275	65	24	6796	26	447b_A_A6	447b
MQ-N	MQ-N1	react_pcf	2	1	434	1	3	22302	44	24	6894	18	454a_S_S1	454a
SQ-A	SQ-A6	react_agg	2	1	812	0	11	52992	90	17	8233	29	456a_A_A6	456a
MQ-N	MQ-N2	start_agg	2	2	1373	0	15	49956	62	26	19078	38	497a_S_S2	497a
MQ-N	MQ-N2	react_pcf	1	2	995	1	8	31744	37	26	13432	44	501a_S_S2	501a
SQ-A	SQ-A6	react_agg	2	1	919	208	6	44299	90	25	12972	37	530b_A_A6	530b
MQ-N	MQ-N2	react_agg	2	1	553	0	0	56492	91	0	11519	178	545b_S_S2	545b
SQ-A	SQ-A5	react_agg	2	1	1044	128	11	39391	60	39	13170	32	551b_A_A5	551b
MQ-N	MQ-N5	react_agg	2	1	1164	0	7	59221	30	32	15447	27	554a_S_S5	554a
MQ-N	MQ-N1	react_pcf	2	2	1600	3	8	65264	48	35	21108	36	584a_S_S1	584a
SQ-A	SQ-A6	react_agg	2	1	804	2	18	72345	41	6	8655	32	640b_A_A6	640b
SQ-A	SQ-A6	react_pcf	2	1	568	3	12	43359	67	16	8580	23	641a_A_A6	641a
MQ-N	MQ-N2	react_pcf	2	1	2446	134	17	24635	53	49	30798	60	642b_S_S2	642b
SQ-N	SQ-N1	start_agg	2	2	234	0	8	11314	46	4	5017	18	59b_N_N1_pooled	59b
SQ-N	SQ-N4	react_agg	2	1	296	3	6	9913	26	11	4536	11	391b_N_N4	391b
