# Supplementary material for: The gut microbiome, single nucleotide polymorphisms, and differentially expressed genes promote aggression in an ant
Source: Research Square preprint supplement (doi:10.21203/rs.3.rs-8539228/v1), 2026-01-09
Supplement: Supplementary file 5 [file ForR_Gene_table.xlsx]

## Sheet: Venn
beh_comparison	expression	geneNames	log2FoldChange	pvalue	padj	FB_name	found in both	transcript	geneNames_gtf
started aggression vs reacted aggressively	downregulated	BicC	-3.0638	4.00827e-05	0.0248624	FBgn0000182	xxx	transcript:Talp_g8028.t1.m12673	MSTRG.7840
started aggression vs reacted aggressively	downregulated	Talp_g7179_NC	-1.78279	1.09249e-06	0.011789			transcript:Talp_g7179.t1	MSTRG.7068
started aggression vs reacted aggressively	downregulated	LOC103317067	-1.64483	1.4141e-05	0.0184772			transcript:Talp_g3725.t1.m6383	MSTRG.3802
started aggression vs reacted aggressively	downregulated	LOC103317335	-1.35178	3.86286e-06	0.011789			transcript:Talp_g16999.t1.m26890	MSTRG.15909
started aggression vs reacted aggressively	downregulated	Talp_g7164_NC	-1.33149	0.000353873	0.0491151			transcript:Talp_g7164.t1	MSTRG.7054
started aggression vs reacted aggressively	downregulated	LOC103315917	-1.32301	0.000320101	0.0476524			transcript:Talp_g13248.t1.m20607	MSTRG.12368
started aggression vs reacted aggressively	downregulated	LOC103317561	-1.21351	0.000115325	0.0341082			transcript:Talp_g11424.t1.m17849	MSTRG.10622
started aggression vs reacted aggressively	downregulated	OG_9850	-1.19536	0.000286645	0.0476524			transcript:Talp_g12366.t1.m19280	MSTRG.11527
started aggression vs reacted aggressively	downregulated	CG3238	-1.13568	0.000365119	0.0491151	FBgn0031540		transcript:Talp_g17222.t1.m27223	MSTRG.16119
started aggression vs reacted aggressively	downregulated	LOC107965784	-1.08598	0.000314747	0.0476524			transcript:Talp_g8076.t1.m12719	MSTRG.7858
started aggression vs reacted aggressively	downregulated	Talp_g13383_NC	-1.06037	0.000304068	0.0476524			transcript:Talp_g13383.t1	MSTRG.12481
started aggression vs reacted aggressively	downregulated	Exo84	-1.04691	3.01185e-06	0.011789	FBgn0266668		transcript:Talp_g16725.t3.m26527	MSTRG.15669
started aggression vs reacted aggressively	downregulated	Talp_g6294_NC	-0.999268	5.34199e-05	0.0297818			transcript:Talp_g6294.t1	MSTRG.6151
started aggression vs reacted aggressively	downregulated	LOC103318185	-0.951165	0.000224629	0.0439998			transcript:Talp_g4147.t1.m6980	MSTRG.4161
started aggression vs reacted aggressively	downregulated	Talp_g5810_NC	-0.937526	0.000244779	0.0455493			transcript:Talp_g5810.t1	MSTRG.5711
started aggression vs reacted aggressively	downregulated	LOC100679608	-0.909289	5.35822e-06	0.0119649			transcript:Talp_g17913.t1.m28376	MSTRG.16792
started aggression vs reacted aggressively	downregulated	OG_9651	-0.804417	0.000265225	0.0459115			transcript:Talp_g5048.t1.m8450	MSTRG.5050
started aggression vs reacted aggressively	downregulated	yellow-d2	-0.772829	0.000389716	0.0495258	FBgn0034856	x	transcript:Talp_g6809.t3.m10959	MSTRG.6709
started aggression vs reacted aggressively	downregulated	Talp_g17849_NC	-0.748553	2.95969e-05	0.0248624			transcript:Talp_g17849.t1	MSTRG.16737
started aggression vs reacted aggressively	downregulated	Talp_g1029_NC	-0.743844	0.000100303	0.0329376			transcript:Talp_g1029.t1	MSTRG.1015
started aggression vs reacted aggressively	downregulated	Talp_g9848_NC	-0.725463	0.000391116	0.0495258			transcript:Talp_g9848.t1	MSTRG.9285
started aggression vs reacted aggressively	downregulated	Talp_g7566_NC	-0.716715	4.6728e-05	0.0274589			transcript:Talp_g7566.t1	MSTRG.7441
started aggression vs reacted aggressively	downregulated	PlexA	-0.667133	0.000382286	0.0495258	FBgn0025741		transcript:Talp_g16062.t5.m25431	MSTRG.15080
started aggression vs reacted aggressively	downregulated	LOC103316878	-0.662076	0.000371254	0.0493458			transcript:Talp_g6730.t1.m10825	MSTRG.6635
started aggression vs reacted aggressively	downregulated	Talp_g9256_NC	-0.659492	6.68137e-06	0.0124329			transcript:Talp_g9256.t1	MSTRG.8796
started aggression vs reacted aggressively	downregulated	LOC103316795	-0.655204	0.000189247	0.0399526			transcript:Talp_g13533.t1.m21165	MSTRG.12624
started aggression vs reacted aggressively	downregulated	LOC103317038	-0.567089	0.000293857	0.0476524			transcript:Talp_g4694.t1.m7889	MSTRG.4702
started aggression vs reacted aggressively	downregulated	Talp_g10943_NC	-0.556943	0.000120222	0.0341082			transcript:Talp_g10943.t1	MSTRG.10213
started aggression vs reacted aggressively	downregulated	Talp_g3303_NC	-0.480603	0.000287084	0.0476524			transcript:Talp_g3303.t1	MSTRG.3360
started aggression vs reacted aggressively	downregulated	LOC100679823	-0.46499	0.000240927	0.0455493			transcript:Talp_g9366.t3.m14729	MSTRG.8902
started aggression vs reacted aggressively	downregulated	Talp_g18001_NC	-0.398881	0.000192049	0.0399526			transcript:Talp_g18001.t1	MSTRG.16900
started aggression vs reacted aggressively	downregulated	LOC100678188	-0.372758	0.000335422	0.0481778			transcript:Talp_g1465.t1.m2611	MSTRG.1453
started aggression vs reacted aggressively	downregulated	Tret1-1	-0.226448	0.000187713	0.0399526	FBgn0050035		transcript:Talp_g17341.t4.m27414	MSTRG.16232
started aggression vs reacted aggressively	downregulated	Taf5	-0.22411	7.00118e-05	0.0307188	FBgn0010356		transcript:Talp_g15512.t2.m24543	MSTRG.14623
started aggression vs reacted aggressively	downregulated	Doa	-0.20038	9.58857e-05	0.0324413	FBgn0265998		transcript:Talp_g1475.t6.m2631	MSTRG.1464
started aggression vs reacted aggressively	downregulated	Vps35	-0.145226	0.000389135	0.0495258	FBgn0034708		transcript:Talp_g10938.t5.m17157	MSTRG.10209
started aggression vs reacted aggressively	upregulated	LOC103316462	3.18862	7.32377e-05	0.0307188			transcript:Talp_g7490.t1.m11873	MSTRG.7360
started aggression vs reacted aggressively	upregulated	CG3800	2.4811	4.22357e-06	0.011789	FBgn0034802	xxx	transcript:Talp_g10466.t1.m16471	MSTRG.9806
started aggression vs reacted aggressively	upregulated	Talp_g13981_NC	1.05764	0.000125252	0.0341082			transcript:Talp_g13981.t1	MSTRG.13053
started aggression vs reacted aggressively	upregulated	LOC725530	0.532824	0.000163311	0.0396385			transcript:Talp_g11100.t1.m17396	MSTRG.10327
started aggression vs reacted aggressively	upregulated	CG3902	0.525737	3.69281e-05	0.0248624	FBgn0036824		transcript:Talp_g14425.t1.m22604	MSTRG.13575
started aggression vs reacted aggressively	upregulated	CDase	0.495946	6.61645e-05	0.0307188	FBgn0039774		transcript:Talp_g818.t2.m1516	MSTRG.798
started aggression vs reacted aggressively	upregulated	CG3061	0.244366	0.000152847	0.0387849	FBgn0038195	x	transcript:Talp_g5511.t1.m9097	MSTRG.5450
started aggression vs reacted aggressively	upregulated	Rhp	0.2352	3.27891e-05	0.0248624	FBgn0026374		transcript:Talp_g17682.t1.m27966	MSTRG.16598
started aggression vs reacted aggressively	upregulated	Talp_g9220_NC	0.210282	0.000185768	0.0399526			transcript:Talp_g9220.t1	MSTRG.8757
started aggression vs reacted aggressively	upregulated	svr	0.196517	0.00036352	0.0491151	FBgn0004648	x	transcript:Talp_g4275.t5.m7231	MSTRG.4267
started aggression vs reacted aggressively	upregulated	Syt4	0.193652	9.55741e-05	0.0324413	FBgn0028400	x	transcript:Talp_g5135.t1.m8532	MSTRG.5109
started aggression vs reacted aggressively	upregulated	OG_9394	0.147226	5.60158e-05	0.0297818			transcript:Talp_g6181.t1.m9957	MSTRG.6069
started aggression vs reacted aggressively	upregulated	Moe	0.121642	0.000180738	0.0399526	FBgn0011661		transcript:Talp_g1658.t4.m2961	MSTRG.1649
started aggression vs reacted peacefully	downregulated	OG_10401	-1.59586	0.000600358	0.0464024			transcript:Talp_g15604.t1.m24681	MSTRG.14704
started aggression vs reacted peacefully	downregulated	Talp_g16099_NC	-1.53593	0.000120201	0.0325637			transcript:Talp_g16099.t1	MSTRG.15113
started aggression vs reacted peacefully	downregulated	Talp_g5657_NC	-1.48717	0.000173312	0.0364354			transcript:Talp_g5657.t1	MSTRG.5583
started aggression vs reacted peacefully	downregulated	Talp_g10747	-1.43203	1.65932e-05	0.0189329			transcript:Talp_g10747.t1.m16907	MSTRG.10037
started aggression vs reacted peacefully	downregulated	LOC103317009	-1.08695	0.000310897	0.0394149			transcript:Talp_g17917.t1.m28382	MSTRG.16797
started aggression vs reacted peacefully	downregulated	Talp_g7566_NC	-1.05012	3.71619e-05	0.0231033			transcript:Talp_g7566.t1	MSTRG.7441
started aggression vs reacted peacefully	downregulated	LOC100679608	-1.04085	1.40517e-05	0.0189329			transcript:Talp_g17913.t1.m28376	MSTRG.16792
started aggression vs reacted peacefully	downregulated	OG_10936	-1.00899	0.000366457	0.0409964			transcript:Talp_g3244.t1.m5536	MSTRG.3300
started aggression vs reacted peacefully	downregulated	Talp_g9334_NC	-0.979967	0.000699077	0.0491474			transcript:Talp_g9334.t1	MSTRG.8882
started aggression vs reacted peacefully	downregulated	LOC103316075	-0.958585	9.49702e-05	0.0314596			transcript:Talp_g17617.t1.m27880	MSTRG.16524
started aggression vs reacted peacefully	downregulated	Talp_g16636_NC	-0.952152	0.000666471	0.0486713			transcript:Talp_g16636.t1	MSTRG.15600
started aggression vs reacted peacefully	downregulated	CG3822	-0.910251	0.000424986	0.0414135	FBgn0038837		transcript:Talp_g4179.t1.m7039	MSTRG.4186
started aggression vs reacted peacefully	downregulated	Talp_g3647_NC	-0.847198	0.000409623	0.0414135			transcript:Talp_g3647.t1	MSTRG.3707
started aggression vs reacted peacefully	downregulated	LOC103316557	-0.837817	0.000207544	0.0377252			transcript:Talp_g17916.t1.m28381	MSTRG.16796
started aggression vs reacted peacefully	downregulated	Talp_g1029_NC	-0.819114	0.000279787	0.0394149			transcript:Talp_g1029.t1	MSTRG.1015
started aggression vs reacted peacefully	downregulated	Talp_g5431_NC	-0.817098	7.3896e-05	0.0291861			transcript:Talp_g5431.t1	MSTRG.5352
started aggression vs reacted peacefully	downregulated	Talp_g15519_NC	-0.801692	0.000355742	0.0409964			transcript:Talp_g15519.t1	MSTRG.14630
started aggression vs reacted peacefully	downregulated	Talp_g8926_NC	-0.792765	0.000519395	0.0444139			transcript:Talp_g8926.t1	MSTRG.8531
started aggression vs reacted peacefully	downregulated	Talp_g7967_NC	-0.787369	0.00021892	0.0378905			transcript:Talp_g7967.t1	MSTRG.7794
started aggression vs reacted peacefully	downregulated	LOC103316878	-0.769768	9.1557e-05	0.0313399			transcript:Talp_g6730.t1.m10825	MSTRG.6635
started aggression vs reacted peacefully	downregulated	Talp_g567_NC	-0.766669	0.000194608	0.0377252			transcript:Talp_g567.t1	MSTRG.592
started aggression vs reacted peacefully	downregulated	yellow-d2	-0.729073	0.000689213	0.0489215	FBgn0034856	x	transcript:Talp_g6809.t3.m10959	MSTRG.6709
started aggression vs reacted peacefully	downregulated	Talp_g11362_NC	-0.719168	0.000640614	0.04767			transcript:Talp_g11362.t1	MSTRG.10571
started aggression vs reacted peacefully	downregulated	OG_9452	-0.691322	0.000579843	0.0464024			transcript:Talp_g11932.t1.m18564	MSTRG.11103
started aggression vs reacted peacefully	downregulated	Talp_g17254	-0.684526	0.000477672	0.0430281			transcript:Talp_g17254.t1.m27258	MSTRG.16144
started aggression vs reacted peacefully	downregulated	Talp_g6489_NC	-0.672744	0.000447648	0.0414135			transcript:Talp_g6489.t1	MSTRG.6386
started aggression vs reacted peacefully	downregulated	Talp_g14339	-0.650203	0.000349443	0.0409964			transcript:Talp_g14339.t1.m22466	MSTRG.13486
started aggression vs reacted peacefully	downregulated	OG_11146	-0.645631	0.00020563	0.0377252			transcript:Talp_g15938.t1.m25293	MSTRG.15010
started aggression vs reacted peacefully	downregulated	Talp_g14342_NC	-0.631925	0.00069078	0.0489215			transcript:Talp_g14342.t1	MSTRG.13489
started aggression vs reacted peacefully	downregulated	Talp_g6301_NC	-0.564166	3.8247e-05	0.0231033			transcript:Talp_g6301.t1	MSTRG.6155
started aggression vs reacted peacefully	downregulated	Talp_g3525_NC	-0.560513	0.00024344	0.0390608			transcript:Talp_g3525.t1	MSTRG.3568
started aggression vs reacted peacefully	downregulated	Talp_g9256_NC	-0.55171	3.95662e-05	0.0231033			transcript:Talp_g9256.t1	MSTRG.8796
started aggression vs reacted peacefully	downregulated	LOC103316795	-0.55009	0.000269017	0.0394149			transcript:Talp_g13533.t1.m21165	MSTRG.12624
started aggression vs reacted peacefully	downregulated	Rdl	-0.537348	0.000673024	0.0486713	FBgn0004244		transcript:Talp_g15167.t10.m23944	MSTRG.14246
started aggression vs reacted peacefully	downregulated	Talp_g9909	-0.534669	0.000527656	0.0444139			transcript:Talp_g9909.t1.m15601	MSTRG.9336
started aggression vs reacted peacefully	downregulated	RfC3	-0.502739	0.000673029	0.0486713	FBgn0032244		transcript:Talp_g13601.t1.m21266	MSTRG.12676
started aggression vs reacted peacefully	downregulated	Talp_g12472_NC	-0.485382	0.000134181	0.0344477			transcript:Talp_g12472.t1	MSTRG.11622
started aggression vs reacted peacefully	downregulated	CG10431	-0.453041	0.000308853	0.0394149	FBgn0032730		transcript:Talp_g2042.t1.m3666	MSTRG.2055
started aggression vs reacted peacefully	downregulated	LOC100679823	-0.446738	0.000133712	0.0344477			transcript:Talp_g9366.t3.m14729	MSTRG.8902
started aggression vs reacted peacefully	downregulated	LOC100114798	-0.442352	0.000285612	0.0394149			transcript:Talp_g16776.t2.m26609	MSTRG.15714
started aggression vs reacted peacefully	downregulated	Cdep	-0.430179	0.000287575	0.0394149	FBgn0265082		transcript:Talp_g652.t2.m1186	MSTRG.659
started aggression vs reacted peacefully	downregulated	LOC103317696	-0.41891	0.000368868	0.0409964			transcript:Talp_g17884.t1.m28320	MSTRG.16768
started aggression vs reacted peacefully	downregulated	LOC100123547	-0.41831	8.24255e-05	0.0302296			transcript:Talp_g16656.t2.m26412	MSTRG.15617
started aggression vs reacted peacefully	downregulated	Dscam1	-0.405416	0.000286729	0.0394149	FBgn0033159		transcript:Talp_g10945.t5	MSTRG.10214
started aggression vs reacted peacefully	downregulated	CG7492	-0.402435	0.00057553	0.0464024	FBgn0035807		transcript:Talp_g7373.t3.m11720	MSTRG.7238
started aggression vs reacted peacefully	downregulated	CG6910	-0.356797	0.000114966	0.0325637	FBgn0036262		transcript:Talp_g8511.t2.m13352	MSTRG.8183
started aggression vs reacted peacefully	downregulated	snRNP-U1-70K	-0.346443	0.000317062	0.0395797	FBgn0016978		transcript:Talp_g1119.t10.m2034	MSTRG.1119
started aggression vs reacted peacefully	downregulated	CG31550	-0.319338	0.000276282	0.0394149	FBgn0051550		transcript:Talp_g4210.t13.m7121	MSTRG.4215
started aggression vs reacted peacefully	downregulated	l(1)G0196	-0.301859	1.57479e-05	0.0189329	FBgn0027279		transcript:Talp_g12696.t8.m19765	MSTRG.11829
started aggression vs reacted peacefully	downregulated	CG9346	-0.290743	0.000377589	0.0409964	FBgn0034572		transcript:Talp_g7085.t3.m11328	MSTRG.6963
started aggression vs reacted peacefully	downregulated	CG32486	-0.288866	0.000717899	0.0491474	FBgn0266918		transcript:Talp_g15890.t4.m25200	MSTRG.14975
started aggression vs reacted peacefully	downregulated	agt	-0.288076	0.000302024	0.0394149	FBgn0024912		transcript:Talp_g6158.t4.m9914	MSTRG.6054
started aggression vs reacted peacefully	downregulated	Gcn5	-0.270486	8.69688e-05	0.030796	FBgn0020388		transcript:Talp_g3508.t1.m5996	MSTRG.3553
started aggression vs reacted peacefully	downregulated	Talp_g1444_NC	-0.26311	0.00039124	0.0409964			transcript:Talp_g1444.t1	MSTRG.1438
started aggression vs reacted peacefully	downregulated	LOC727647	-0.261308	0.000443914	0.0414135			transcript:Talp_g5024.t1.m8401	MSTRG.5017
started aggression vs reacted peacefully	downregulated	baz	-0.260096	3.12705e-06	0.00802793	FBgn0000163		transcript:Talp_g5313.t3.m8830	MSTRG.5245
started aggression vs reacted peacefully	downregulated	CG13366	-0.242584	0.000442393	0.0414135	FBgn0025633		transcript:Talp_g129.t12.m232	MSTRG.143
started aggression vs reacted peacefully	downregulated	Talp_g9262_NC	-0.24162	0.000384255	0.0409964			transcript:Talp_g9262.t1	MSTRG.8800
started aggression vs reacted peacefully	downregulated	U2af50	-0.223613	0.000231085	0.0389019	FBgn0005411		transcript:Talp_g17459.t6.m27629	MSTRG.16355
started aggression vs reacted peacefully	downregulated	LOC100119138	-0.179634	0.000658932	0.0486713			transcript:Talp_g3516.t1.m6011	MSTRG.3559
started aggression vs reacted peacefully	downregulated	CG8108	-0.153209	0.000711581	0.0491474	FBgn0027567		transcript:Talp_g16356.t9.m25920	MSTRG.15330
started aggression vs reacted peacefully	upregulated	CG34367	0.499507	0.000103102	0.0314924	FBgn0085396		transcript:Talp_g14406.t2.m22566	MSTRG.13555
started aggression vs reacted peacefully	upregulated	Talp_g3549_NC	0.491316	6.45705e-05	0.0285565			transcript:Talp_g3549.t1	MSTRG.3609
started aggression vs reacted peacefully	upregulated	CG13625	0.427379	3.36543e-05	0.0231033	FBgn0039210		transcript:Talp_g12757.t2.m19890	MSTRG.11883
started aggression vs reacted peacefully	upregulated	CG3655	0.390723	0.000249031	0.0393431	FBgn0040397		transcript:Talp_g11692.t4.m18201	MSTRG.10870
started aggression vs reacted peacefully	upregulated	apolpp	0.367043	0.00038553	0.0409964	FBgn0087002		transcript:Talp_g1646.t1.m2935	MSTRG.1636
started aggression vs reacted peacefully	upregulated	CG14687	0.355347	0.00036424	0.0409964	FBgn0037835		transcript:Talp_g12955.t3.m20157	MSTRG.12042
started aggression vs reacted peacefully	upregulated	CG3655	0.321721	3.45064e-05	0.0231033	FBgn0040397		transcript:Talp_g6552.t1.m10555	MSTRG.6448
started aggression vs reacted peacefully	upregulated	Gat	0.284854	0.000682001	0.0489215	FBgn0039915		transcript:Talp_g10384.t5.m16372	MSTRG.9715
started aggression vs reacted peacefully	upregulated	Sur-8	0.268623	0.000118836	0.0325637	FBgn0038504		transcript:Talp_g719.t1.m1334	MSTRG.718
started aggression vs reacted peacefully	upregulated	Talp_g17779_NC	0.263105	0.00038981	0.0409964			transcript:Talp_g17779.t1	MSTRG.16678
started aggression vs reacted peacefully	upregulated	mRpL9	0.250942	0.000149466	0.0354259	FBgn0038319		transcript:Talp_g9337.t2.m14673	MSTRG.8884
started aggression vs reacted peacefully	upregulated	CG9175	0.245364	0.000384505	0.0409964	FBgn0031779		transcript:Talp_g6250.t1.m10061	MSTRG.6118
started aggression vs reacted peacefully	upregulated	svr	0.233128	2.31661e-06	0.00792977	FBgn0004648	v	transcript:Talp_g4275.t5.m7231	MSTRG.4267
started aggression vs reacted peacefully	upregulated	CG3061	0.22198	6.95212e-05	0.0285565	FBgn0038195	x	transcript:Talp_g5511.t1.m9097	MSTRG.5450
started aggression vs reacted peacefully	upregulated	CG6656	0.221832	0.000494476	0.0435795	FBgn0038912		transcript:Talp_g14.t1.m26	MSTRG.40
started aggression vs reacted peacefully	upregulated	Phm	0.218599	0.000438738	0.0414135	FBgn0283509		transcript:Talp_g9510.t2.m14923	MSTRG.9008
started aggression vs reacted peacefully	upregulated	Socs16D	0.213987	1.57857e-05	0.0189329	FBgn0030869		transcript:Talp_g1393.t2.m2505	MSTRG.1396
started aggression vs reacted peacefully	upregulated	Vav	0.205629	0.000561656	0.0464024	FBgn0040068		transcript:Talp_g13088.t4.m20373	MSTRG.12241
started aggression vs reacted peacefully	upregulated	CG3860	0.188753	0.000156771	0.0357752	FBgn0034951		transcript:Talp_g15217.t1.m24011	MSTRG.14300
started aggression vs reacted peacefully	upregulated	Syt4	0.180794	4.27463e-05	0.0231033	FBgn0028400	x	transcript:Talp_g5135.t1.m8532	MSTRG.5109
started aggression vs reacted peacefully	upregulated	LOC552402	0.177453	0.000403896	0.0414135			transcript:Talp_g9826.t1.m15446	MSTRG.9253
started aggression vs reacted peacefully	upregulated	CG32225	0.175604	0.000629941	0.047218	FBgn0052225		transcript:Talp_g12356.t1.m19269	MSTRG.11518
started aggression vs reacted peacefully	upregulated	CG9426	0.160951	0.000375037	0.0409964	FBgn0032485		transcript:Talp_g16184.t3.m25625	MSTRG.15200
started aggression vs reacted peacefully	upregulated	alph	0.14756	3.32135e-05	0.0231033	FBgn0086361		transcript:Talp_g8330.t2.m13063	MSTRG.8049
started aggression vs reacted peacefully	upregulated	CG16974	0.135961	0.000585207	0.0464024	FBgn0032479		transcript:Talp_g9289.t1.m14590	MSTRG.8840
started aggression vs reacted peacefully	upregulated	CG10483	0.129231	0.000597827	0.0464024	FBgn0035649		transcript:Talp_g11737.t10.m18274	MSTRG.10900
started aggression vs reacted peacefully	upregulated	AP-2alpha	0.126973	0.000369591	0.0409964	FBgn0264855		transcript:Talp_g7112.t1.m11369	MSTRG.6997
started aggression vs reacted peacefully	upregulated	bchs	0.107008	0.000602812	0.0464024	FBgn0043362		transcript:Talp_g2740.t6.m4669	MSTRG.2839

## Sheet: barplot
use	geneNames	geneNames_help	log2FoldChange	behavioural_comp	expression	FB_name	function_plot	function	function_explaing	explanation	function_	paper1	paper2
x	BicC	BicC	-3.0638	started aggression vs reacted aggressively	downregulated	FBgn0000182	Neurological and synaptic	activated	nervous system	downregulation of BicC activates and upregulates Wnt-pathway, which should cause activation of workers as upegulated BicC is associated with chronic stress and depresion in mice
x	Pif1	CG3238	-1.13568	started aggression vs reacted aggressively	downregulated	FBgn0031540	DNA replication, repair and genome stability	Pif1 is a DNA helicase involved in double-strand break repair via homologous recombination and break-induced replication	DNA helicase; telomere maintenance, recombination	We further found that downregulation of PIF1 expression by transfecting PIF1 siRNA (#1, #2) into NB cells, increased the number of apoptotic cells, inhibited the cell survival, decreased the ability of cell migration and induced a cell cycle arrest at G1 phase. https://www.sciencedirect.com/science/article/abs/pii/S0024320520305695	Predicted to enable 5'-3' DNA helicase activity. Involved in double-strand break repair via break-induced replication. Predicted to be located in nucleus. Is expressed in organism. Orthologous to human PIF1 (PIF1 5'-to-3' DNA helicase).	PIF1 is a multifunctional helicase and DNA processing enzyme, which plays a vital role in maintaining the stability of the genome [18,19]. Studies have shown that PIF1 is conservative in eukaryotes and also found in some prokaryotes [20,21]. This gene encodes a DNA-dependent adenosine triphosphate (ATP) metabolic enzyme that functions as 5′ to 3′ DNA helicases [[22], [23], [24], [25]]. The encode…	Downregulation of PIF1 induce DNA damage and inhibit ovarian cancer cell proliferation via RAD51 https://www.researchsquare.com/article/rs-4495865/v1
x	Exo84	Exo84	-1.04691	started aggression vs reacted aggressively	downregulated	FBgn0266668	Neurological and synaptic	Exo84 is a component of the exocyst complex, involved in targeting exocytic vesicles to specific docking sites on the plasma membrane, crucial for exocytosis.	The Drosophila homolog of the Exo84 exocyst subunit promotes apical epithelial identity (https://journals.biologists.com/jcs/article/120/17/3099/29695/The-Drosophila-homolog-of-the-Exo84-exocyst; https://www.sdbonline.org/sites/fly/genebrief/exo84.htm; https://www.cell.com/neuron/pdf/S0896-6273(03)00031-X.pdf	snp in exo84 can cause neuredeveliopmental disorders, developmental delay, etc (https://repository.escholarship.umassmed.edu/server/api/core/bitstreams/6c60c4c3-cc30-492e-be19-05905641a714/content); Mitotic phosphorylation of Exo84 disrupted the assembly of the exocyst complex, thereby affecting exocytosis and cell surface expansion. https://pmc.ncbi.nlm.nih.gov/articles/PMC3704991/	Exocyst 84 (Exo84) encodes an exocyst component involved in epithelial polarity. It mediates the apical localization of the transmembrane protein encoded by crb. [	the exocyst may be important in other aspects of synapse growth and plasticity through its involvement in and regulation of the tethering, docking, and fusion of post-Golgi vesicles with the plasma membrane. https://pmc.ncbi.nlm.nih.gov/articles/PMC3715865/	In multicellular organisms, exocyst components are required for multiple developmental processes including epithelial polarity, membrane integrity, photoreceptor morphogenesis, cell fate determination and synapse formation. These diverse functions demonstrate that polarized exocytosis is a fundamental mechanism for regulating cell morphology (Blankenship, 2007). https://www.sdbonline.org/sites/fl…
x	yellow-d2	yellow-d2	-0.772829	started aggression vs reacted aggressively	downregulated	FBgn0034856	Neurological and synaptic	dopmaine-receptors, cnetral nervous systems	nervous system	yellow-d2: The knowledge of the function of yellow-d2 and is limited. It is known to be important in courtship behaviour in Drosophila melanogaster and for the central nervous system. It might even be that Yellow (the yellow gene family more general) may influence the properties of nearby cells via dopamine-like receptors and a hormone-like mechanism (Drapeau 2003). Activation of different signal…	Predicted to be active in extracellular region	yellow mutant males of Drosophila melanogaster have reduced success in fertilizing normal females. There is a change in the pattern of courtship which could explain this. The wing display (vibration), which is shown to provide important stimuli perceived by the females' antennae, is given in shorter bouts and at longer intervals. https://www.jstor.org/stable/2407002?origin=crossref&seq=1	https://sites.lsa.umich.edu/wittkopp-lab/wp-content/uploads/sites/72/2014/04/Wittkopp-et-al-CB1.pdf
	PlexA	PlexA	-0.667133	started aggression vs reacted aggressively	downregulated	FBgn0025741	Neurological and synaptic	Expressed in the developing nervous system, particularly in neurons	nervous system	In summary, downregulation of PlexinA receptors disrupts critical processes such as axon guidance, neuronal migration, axonal branching, and dendrite development. These effects collectively impair the proper formation and function of neural circuits, underscoring the importance of PlexinA signaling in neural development.	Plexin A (PlexA) encodes a transmembrane receptor for Semaphorin ligands encoded by Sema1a and Sema1b. The intracellular region of this receptor has GTPase activating protein (GAP) activity on Ras/Rap small GTPases. The signaling by the product of PlexA alters actin, microtubules and cell adhesion in developmental processes such as axon guidance.	Phenotypic and genetic interaction analyses implicate PlexinA as the Sema-1a receptor in ORN targeting. https://www.cell.com/neuron/fulltext/S0896-6273%2806%2900942-1#fig4	Together our data uncover a novel role for PlexinA1 in forebrain development (https://onlinelibrary.wiley.com/doi/pdf/10.1002/cne.23806)
x	KaiR1d	CG3822	-0.910251	started aggression vs reacted peacefully	downregulated	FBgn0038837	Neurological and synaptic	KaiR1D is associated with synaptic function, potentially involved in neurotransmitter release mechanisms.	nervous system	downregulation can yield to disrupution to the calcium sensitity of baseline synaptic transmission, that is, robustness to synaptic strenght and plasticity may be impaired	glutamate channel - kainate family protein - localized to presynaptic terminals of the neuromuscular junction - eya - homeostatic potentiation of synaptic strength (Interactive Fly, KaiR1D )	https://www.sdbonline.org/sites/fly/genebrief/kainate_r1d.htm	KaiR1D contributes to the calcium sensitivity of baseline synaptic transmission. Its downregulation diminishes this sensitivity, resulting in altered neurotransmitter release dynamics and potentially affecting muscle contraction efficiency (https://www.cell.com/neuron/fulltext/S0896-6273(16)30808-X?_returnURL=https%3A%2F%2Flinkinghub.elsevier.com%2Fretrieve%2Fpii%2FS089662731630808X%3Fshowall%3Dt…
x	yellow-d2	yellow-d2	-0.729073	started aggression vs reacted peacefully	downregulated	FBgn0034856	Neurological and synaptic	dopmaine-receptors, cnetral nervous systems	nervous system	yellow-d2: The knowledge of the function of yellow-d2 and is limited. It is known to be important in courtship behaviour in Drosophila melanogaster and for the central nervous system. It might even be that Yellow (the yellow gene family more general) may influence the properties of nearby cells via dopamine-like receptors and a hormone-like mechanism (Drapeau 2003). Activation of different signal…	Predicted to be active in extracellular region	yellow mutant males of Drosophila melanogaster have reduced success in fertilizing normal females. There is a change in the pattern of courtship which could explain this. The wing display (vibration), which is shown to provide important stimuli perceived by the females' antennae, is given in shorter bouts and at longer intervals. https://www.jstor.org/stable/2407002?origin=crossref&seq=1	https://sites.lsa.umich.edu/wittkopp-lab/wp-content/uploads/sites/72/2014/04/Wittkopp-et-al-CB1.pdf
x	Rdl	Rdl	-0.537348	started aggression vs reacted peacefully	downregulated	FBgn0004244	Neurological and synaptic	Rdl encodes a GABA-gated chloride channel subunit, involved in inhibitory neurotransmission.	nervous system	downregulation of Rdl leads to reduced inhibitory GABAergice tone, possiblty leading to enhanced memory acquisition but not memory stability. reduced Rdl likely inceases nromal calcium responses of the mushroom bodies in Drosophola to odours	Resistant to dieldrin (Rdl) encodes a widely-expressed ligand-gated chloride channel which mediates the fast inhibitory effects of GABA. It has been shown to have roles in the circuits underlying visual processing, odor coding, learning and memory, sleep and courtship behavior.	https://pmc.ncbi.nlm.nih.gov/articles/PMC2709803/	Our findings indicate that targeted down-regulation of the GABAA receptor Rdl (Resistance to Dieldrin) in leg motoneurons results in a dramatic reduction of walking speed and step length without the loss of general leg coordination during locomotion. https://www.pnas.org/doi/full/10.1073/pnas.1713869115
x	RfC3	RfC3	-0.502739	started aggression vs reacted peacefully	downregulated	FBgn0032244	DNA replication, repair and genome stability	RfC3 is part of the replication factor C complex, essential for DNA replication and repair.	DNA helicase; telomere maintenance, recombination	downregualtion causes decreases in cell prolifertation, viaility and increased apoptosis	important for protein folding transcription, DNA replication and repair, and genome stability	shRNA-mediated silencing of the RFC3 gene suppresses hepatocellular carcinoma cell proliferation (https://www.spandidos-publications.com/10.3892/ijmm.2015.2350) ; https://www.spandidos-publications.com/10.3892/etm.2024.12510/abstract	RFC3 regulates cell proliferation and pathogen resistance in Arabidopsis ()ttps://pmc.ncbi.nlm.nih.gov/articles/PMC2884126/
	gd	gastrulation-defective	0.527172	started aggression vs reacted peacefully	upregulated	FBgn0000808	Neurological and synaptic	encodes a serine protease that is secreted and acts in the perivitelline space (between the oocyte membrane and eggshell)	nervous system	upregulation causes activation of Toll pathway, which is conserved and the Toll pathway triggers the expression of the transcription factor NF-κB, which is known to have functional roles in neuroprotection and synaptic plasticity (XY ). https://www.mcponline.org/article/S1535-9476(20)34104-9/fulltext#seccestitle270	gastrulation-defective (gd) encodes a secreted serine protease. It is a member of the protease cascade that generates the ligand that activates the receptor encoded by Tl. It contributes to establishment of the dorsal-ventral embryonic axis	gastrulation-defective: gd is one of the major components that activate the Toll pathway. The Toll pathway triggers the expression of the transcription factor NF-κB, which is known to have functional roles in neuroprotection and synaptic plasticity (XY ). https://www.mcponline.org/article/S1535-9476(20)34104-9/fulltext#seccestitle270	Nudel, gastrulation defective (Gd), snake and easter constitute the major components of the extracellular signal cascade in the Toll-Dorsal pathway. In insects, the best-characterized function of the Toll-Dorsal pathway is the establishment of the dorsal-ventral axis in early embryonic patterning. This pathway also contributes to other processes at later developmental stages, such as immune respo…
