# Supplementary material for: The gut microbiome, single nucleotide polymorphisms, and differentially expressed genes promote aggression in an ant
Source: Research Square preprint supplement (doi:10.21203/rs.3.rs-8539228/v1), 2026-01-09
Supplement: Supplementary file 6 [file ForR_RNA_82samples.xlsx]

## Sheet: RNA_82samples
id	id_	pop	nest	strAgg_rctAgg	strAgg_rctPcf	rctAgg_rctPcf	AI_worker	beh	lat	lon
49a	49a_S_S1	MQ-N	MQ-N1	x	x		3.29762	start_agg	46.7071	12.9275
50a	50a_N_N1	SQ-N	SQ-N1		x	x	2	react_pcf	47.2191	11.0751
54a	54a_A_A5	SQ-A	SQ-A5		x	x	0.982353	react_pcf	46.8144	11.4424
59a	59a_A_A6	SQ-A	SQ-A6		x	x	-0.994118	react_pcf	46.8148	11.4427
125a	125a_N_N1	SQ-N	SQ-N1	x		x	2.16471	react_agg	47.2191	11.0751
206a	206a_N_N6	SQ-N	SQ-N6	x	x		3.54706	start_agg	47.2192	11.0766
217a	217a_N_N6	SQ-N	SQ-N6		x	x	-0.1	react_pcf	47.2192	11.0766
218a	218a_N_N6	SQ-N	SQ-N6		x	x	0.719008	react_pcf	47.2192	11.0766
226a	226a_S_S5	MQ-N	MQ-N5	x		x	3.44118	react_agg	46.7098	12.9226
237a	237a_S_S1	MQ-N	MQ-N1		x	x	0.958824	react_pcf	46.7071	12.9275
292a	292a_N_N6	SQ-N	SQ-N6	x		x	2.32624	react_agg	47.2192	11.0766
294a	294a_S_S1	MQ-N	MQ-N1	x	x		3.29412	start_agg	46.7071	12.9275
301a	301a_N_N4	SQ-N	SQ-N4	x	x		3.7	start_agg	47.2193	11.0761
302a	302a_N_N4	SQ-N	SQ-N4	x		x	4	react_agg	47.2193	11.0761
390a	390a_S_S1	MQ-N	MQ-N1	x	x		3.95294	start_agg	46.7071	12.9275
391a	391a_S_S5	MQ-N	MQ-N5	x	x		3.51765	start_agg	46.7098	12.9226
403a	403a_A_A5	SQ-A	SQ-A5	x	x		4	start_agg	46.8144	11.4424
404a	404a_A_A5	SQ-A	SQ-A5	x	x		3.24118	start_agg	46.8144	11.4424
405a	405a_N_N1	SQ-N	SQ-N1		x	x	0.458647	react_pcf	47.2191	11.0751
435a	435a_A_A2	SQ-A	SQ-A2		x	x	-0.394737	react_pcf	46.814	11.442
436a	436a_S_S2	MQ-N	MQ-N2	x	x		2.08696	start_agg	46.7075	12.928
450a	450a_N_N1	SQ-N	SQ-N1		x	x	0.840491	react_pcf	47.2191	11.0751
459a	459a_A_A6	SQ-A	SQ-A6	x		x	3.75294	react_agg	46.8148	11.4427
460a	460a_A_A6	SQ-A	SQ-A6	x		x	0.487952	react_agg	46.8148	11.4427
547a	547a_N_N6	SQ-N	SQ-N6	x	x		3.62941	start_agg	47.2192	11.0766
559a	559a_N_N4	SQ-N	SQ-N4	x	x		4	start_agg	47.2193	11.0761
566a	566a_A_A6	SQ-A	SQ-A6	x	x		2.58824	start_agg	46.8148	11.4427
567a	567a_A_A6	SQ-A	SQ-A6	x	x		-0.175325	start_agg	46.8148	11.4427
620a	620a_N_N6	SQ-N	SQ-N6	x	x		3.00588	start_agg	47.2192	11.0766
49b	49b_A_A2	SQ-A	SQ-A2		x	x	-1.09467	react_pcf	46.814	11.442
50b	50b_S_S2	MQ-N	MQ-N2	x	x		3.44706	start_agg	46.7075	12.928
59b	59b_N_N1_pooled	SQ-N	SQ-N1	x	x		3.96471	start_agg	47.2191	11.0751
125b	125b_S_S2	MQ-N	MQ-N2	x	x		3.38235	start_agg	46.7075	12.928
206b	206b_A_A6	SQ-A	SQ-A6		x	x	0.40566	react_pcf	46.8148	11.4427
217b	217b_A_A2	SQ-A	SQ-A2	x	x		3.42857	start_agg	46.814	11.442
218b	218b_S_S1	MQ-N	MQ-N1	x	x		3.85882	start_agg	46.7071	12.9275
226b	226b_N_N4	SQ-N	SQ-N4	x	x		4	start_agg	47.2193	11.0761
237b	237b_N_N4	SQ-N	SQ-N4	x	x		3.22353	start_agg	47.2193	11.0761
292b	292b_A_A2	SQ-A	SQ-A2	x	x		-0.0597015	start_agg	46.814	11.442
294b	294b_N_N6	SQ-N	SQ-N6	x		x	4	react_agg	47.2192	11.0766
301b	301b_A_A6	SQ-A	SQ-A6	x		x	3.67647	react_agg	46.8148	11.4427
302b	302b_S_S5	MQ-N	MQ-N5	x	x		4	start_agg	46.7098	12.9226
390b	390b_N_N6	SQ-N	SQ-N6		x	x	-0.589286	react_pcf	46.7071	12.9275
391b	391b_N_N4	SQ-N	SQ-N4	x		x	2.65031	react_agg	47.2193	11.0761
403b	403b_N_N1	SQ-N	SQ-N1	x		x	4	react_agg	47.2191	11.0751
404b	404b_N_N1	SQ-N	SQ-N1	x		x	3.81765	react_agg	47.2191	11.0751
405b	405b_A_A5	SQ-A	SQ-A5	x	x		3.9	start_agg	46.8144	11.4424
435b	435b_S_S1	MQ-N	MQ-N1	x	x		2.67066	start_agg	46.7071	12.9275
436b	436b_N_N1	SQ-N	SQ-N1	x		x	3.16438	react_agg	47.2191	11.0751
450b	450b_A_A5	SQ-A	SQ-A5	x	x		3.86982	start_agg	46.8144	11.4424
452b	452b_A_A5	SQ-A	SQ-A5	x	x		2	start_agg	46.8144	11.4424
459b	459b_N_N4	SQ-N	SQ-N4	x	x		4	start_agg	47.2193	11.0761
460b	460b_N_N4	SQ-N	SQ-N4	x	x		1.03937	start_agg	47.2193	11.0761
547b	547b_A_A2	SQ-A	SQ-A2	x		x	3.75882	react_agg	46.814	11.442
559b	559b_S_S5	MQ-N	MQ-N5		x	x	0.171053	react_pcf	46.7098	12.9226
566b	566b_N_N4	SQ-N	SQ-N4		x	x	1.16216	react_pcf	47.2193	11.0761
567b	567b_N_N4	SQ-N	SQ-N4	x		x	3.62722	react_agg	47.2193	11.0761
620b	620b_S_S1	MQ-N	MQ-N1	x		x	3.91765	react_agg	46.7071	12.9275
101b	101b_A_A6	SQ-A	SQ-A6		x	x	-1.29771	react_pcf	46.8148	11.4427
304a	304a_S_S5	MQ-N	MQ-N5		x	x	-0.424242	react_pcf	46.7098	12.9226
363b	363b_A_A6	SQ-A	SQ-A6	x		x	0.579882	react_agg	46.8148	11.4427
372b	372b_A_A5	SQ-A	SQ-A5	x	x		3.98824	start_agg	46.8144	11.4424
376a	376a_S_S2	MQ-N	MQ-N2	x		x	2.54412	react_agg	46.7075	12.928
382b	382b_A_A5	SQ-A	SQ-A5	x		x	3.86471	react_agg	46.8144	11.4424
385a	385a_S_S5	MQ-N	MQ-N5		x	x	-1.18012	react_pcf	46.7098	12.9226
399b	399b_A_A6	SQ-A	SQ-A6	x		x	2.42941	react_agg	46.8148	11.4427
408b	408b_A_A5	SQ-A	SQ-A5	x		x	3.08824	react_agg	46.8144	11.4424
410b	410b_S_S1	MQ-N	MQ-N1	x		x	2.03797	react_agg	46.7071	12.9275
446b	446b_A_A6	SQ-A	SQ-A6		x	x	-2	react_pcf	46.8148	11.4427
447b	447b_A_A6	SQ-A	SQ-A6	x		x	3.07059	react_agg	46.8148	11.4427
454a	454a_S_S1	MQ-N	MQ-N1		x	x	-1.27778	react_pcf	46.7071	12.9275
456a	456a_A_A6	SQ-A	SQ-A6	x		x	2.82941	react_agg	46.8148	11.4427
497a	497a_S_S2	MQ-N	MQ-N2	x	x		3.52353	start_agg	46.7075	12.928
501a	501a_S_S2	MQ-N	MQ-N2		x	x	-1	react_pcf	46.7075	12.928
530b	530b_A_A6	SQ-A	SQ-A6	x		x	2.75	react_agg	46.8148	11.4427
545b	545b_S_S2	MQ-N	MQ-N2	x		x	3.1875	react_agg	46.7075	12.928
551b	551b_A_A5	SQ-A	SQ-A5	x		x	3.92941	react_agg	46.8144	11.4424
554a	554a_S_S5	MQ-N	MQ-N5	x		x	-0.876471	react_agg	46.7098	12.9226
584a	584a_S_S1	MQ-N	MQ-N1		x	x	-1.96471	react_pcf	46.7071	12.9275
640b	640b_A_A6	SQ-A	SQ-A6	x		x	1.61789	react_agg	46.8148	11.4427
641a	641a_A_A6	SQ-A	SQ-A6		x	x	-0.724771	react_pcf	46.8148	11.4427
642b	642b_S_S2	MQ-N	MQ-N2		x	x	-1.64179	react_pcf	46.7075	12.928
