# Supplementary material for: The gut microbiome, single nucleotide polymorphisms, and differentially expressed genes promote aggression in an ant
Source: Research Square preprint supplement (doi:10.21203/rs.3.rs-8539228/v1), 2026-01-09
Supplement: Supplementary file 7 [file ForR_SNPs_agg_SuggLine_GEMMA.xlsx]

## Sheet: Data_R2
Sample_ID	beh	scaffold_185_110741	scaffold_163_28302	scaffold_11_2457277	sample	nest	pop	nest_internal_use	pop_internal_use	scaffold_185_110741_	scaffold_163_28302_	scaffold_11_2457277_
101a_S1'	start_agg	0/1	0/1	0/1	101a	MQ-N1	MQ-N	S1	S	heterozygous	heterozygous	heterozygous
218b_S1'	start_agg	0/1	0/1	0/1	218b	MQ-N1	MQ-N	S1	S	heterozygous	heterozygous	heterozygous
294a_S1'	start_agg	0/0	0/1	0/0	294a	MQ-N1	MQ-N	S1	S	homozygous_ref	heterozygous	homozygous_ref
390a_S1'	start_agg	0/1	0/1	0/0	390a	MQ-N1	MQ-N	S1	S	heterozygous	heterozygous	homozygous_ref
399a_S1'	start_agg	0/1	0/1	0/0	399a	MQ-N1	MQ-N	S1	S	heterozygous	heterozygous	homozygous_ref
408a_S1'	start_agg	0/1	0/1	0/0	408a	MQ-N1	MQ-N	S1	S	heterozygous	heterozygous	homozygous_ref
435b_S1'	start_agg	0/0	0/0	0/1	435b	MQ-N1	MQ-N	S1	S	homozygous_ref	homozygous_ref	heterozygous
446a_S1'	start_agg	0/1	0/0	0/1	446a	MQ-N1	MQ-N	S1	S	heterozygous	homozygous_ref	heterozygous
447a_S1'	start_agg	0/0	0/1	0/0	447a	MQ-N1	MQ-N	S1	S	homozygous_ref	heterozygous	homozygous_ref
49a_S1'	start_agg	0/1	0/1	0/0	49a	MQ-N1	MQ-N	S1	S	heterozygous	heterozygous	homozygous_ref
125b_S2'	start_agg	0/1	0/1	0/0	125b	MQ-N2	MQ-N	S2	S	heterozygous	heterozygous	homozygous_ref
436a_S2'	start_agg	0/1	0/0	0/1	436a	MQ-N2	MQ-N	S2	S	heterozygous	homozygous_ref	heterozygous
497a_S2'	start_agg	0/1	0/1	0/0	497a	MQ-N2	MQ-N	S2	S	heterozygous	heterozygous	homozygous_ref
50b_S2'	start_agg	0/1	0/1	0/0	50b	MQ-N2	MQ-N	S2	S	heterozygous	heterozygous	homozygous_ref
640a_S2'	start_agg	0/1	0/1	0/0	640a	MQ-N2	MQ-N	S2	S	heterozygous	heterozygous	homozygous_ref
222b_S5'	start_agg	0/1	0/0	0/0	222b	MQ-N5	MQ-N	S5	S	heterozygous	homozygous_ref	homozygous_ref
227a_S5'	start_agg	0/1	0/1	0/0	227a	MQ-N5	MQ-N	S5	S	heterozygous	heterozygous	homozygous_ref
302b_S5'	start_agg	0/1	0/0	0/0	302b	MQ-N5	MQ-N	S5	S	heterozygous	homozygous_ref	homozygous_ref
391a_S5'	start_agg	0/0	0/1	0/0	391a	MQ-N5	MQ-N	S5	S	homozygous_ref	heterozygous	homozygous_ref
402b_S5'	start_agg	0/1	0/1	0/0	402b	MQ-N5	MQ-N	S5	S	heterozygous	heterozygous	homozygous_ref
551a_S5'	start_agg	0/1	0/0	0/0	551a	MQ-N5	MQ-N	S5	S	heterozygous	homozygous_ref	homozygous_ref
217b_A2'	start_agg	0/1	0/1	0/0	217b	SQ-A2	SQ-A	A2	A	heterozygous	heterozygous	homozygous_ref
292b_A2'	start_agg	0/1	0/1	0/0	292b	SQ-A2	SQ-A	A2	A	heterozygous	heterozygous	homozygous_ref
372b_A5'	start_agg	0/0	0/0	0/0	372b	SQ-A5	SQ-A	A5	A	homozygous_ref	homozygous_ref	homozygous_ref
403a_A5'	start_agg	0/0	0/0	0/0	403a	SQ-A5	SQ-A	A5	A	homozygous_ref	homozygous_ref	homozygous_ref
404a_A5'	start_agg	0/1	0/0	0/0	404a	SQ-A5	SQ-A	A5	A	heterozygous	homozygous_ref	homozygous_ref
405b_A5'	start_agg	0/0	0/0	0/0	405b	SQ-A5	SQ-A	A5	A	homozygous_ref	homozygous_ref	homozygous_ref
450b_A5'	start_agg	0/0	0/0	0/0	450b	SQ-A5	SQ-A	A5	A	homozygous_ref	homozygous_ref	homozygous_ref
452b_A5'	start_agg	0/1	0/0	0/0	452b	SQ-A5	SQ-A	A5	A	heterozygous	homozygous_ref	homozygous_ref
566a_A6'	start_agg	0/1	0/1	0/0	566a	SQ-A6	SQ-A	A6	A	heterozygous	heterozygous	homozygous_ref
567a_A6'	start_agg	0/1	0/1	0/0	567a	SQ-A6	SQ-A	A6	A	heterozygous	heterozygous	homozygous_ref
59b_N1'	start_agg	0/1	0/1	0/0	59b	SQ-N1	SQ-N	N1	N	heterozygous	heterozygous	homozygous_ref
226b_N4'	start_agg	0/1	0/1	0/0	226b	SQ-N4	SQ-N	N4	N	heterozygous	heterozygous	homozygous_ref
237b_N4'	start_agg	0/1	0/0	0/0	237b	SQ-N4	SQ-N	N4	N	heterozygous	homozygous_ref	homozygous_ref
301a_N4'	start_agg	0/0	0/0	0/0	301a	SQ-N4	SQ-N	N4	N	homozygous_ref	homozygous_ref	homozygous_ref
459b_N4'	start_agg	0/1	0/1	0/0	459b	SQ-N4	SQ-N	N4	N	heterozygous	heterozygous	homozygous_ref
460b_N4'	start_agg	0/1	0/0	0/0	460b	SQ-N4	SQ-N	N4	N	heterozygous	homozygous_ref	homozygous_ref
559a_N4'	start_agg	0/1	0/0	0/0	559a	SQ-N4	SQ-N	N4	N	heterozygous	homozygous_ref	homozygous_ref
206a_N6'	start_agg	0/0	0/0	0/0	206a	SQ-N6	SQ-N	N6	N	homozygous_ref	homozygous_ref	homozygous_ref
547a_N6'	start_agg	0/0	0/1	0/0	547a	SQ-N6	SQ-N	N6	N	homozygous_ref	heterozygous	homozygous_ref
620a_N6'	start_agg	0/1	0/0	0/0	620a	SQ-N6	SQ-N	N6	N	heterozygous	homozygous_ref	homozygous_ref
410b_S1'	react_agg	0/0	0/1	0/1	410b	MQ-N1	MQ-N	S1	S	homozygous_ref	heterozygous	heterozygous
52a_S1'	react_agg	0/0	0/1	0/0	52a	MQ-N1	MQ-N	S1	S	homozygous_ref	heterozygous	homozygous_ref
57a_S1'	react_agg	0/1	0/1	0/0	57a	MQ-N1	MQ-N	S1	S	heterozygous	heterozygous	homozygous_ref
60a_S1'	react_agg	0/0	0/1	0/0	60a	MQ-N1	MQ-N	S1	S	homozygous_ref	heterozygous	homozygous_ref
620b_S1'	react_agg	0/0	0/1	0/0	620b	MQ-N1	MQ-N	S1	S	homozygous_ref	heterozygous	homozygous_ref
116a_S2'	react_agg	0/0	0/1	0/0	116a	MQ-N2	MQ-N	S2	S	homozygous_ref	heterozygous	homozygous_ref
253b_S2'	react_agg	0/1	0/1	0/0	253b	MQ-N2	MQ-N	S2	S	heterozygous	heterozygous	homozygous_ref
257a_S2'	react_agg	0/0	0/1	0/0	257a	MQ-N2	MQ-N	S2	S	homozygous_ref	heterozygous	homozygous_ref
376a_S2'	react_agg	0/1	0/1	0/1	376a	MQ-N2	MQ-N	S2	S	heterozygous	heterozygous	heterozygous
545b_S2'	react_agg	0/0	0/1	0/0	545b	MQ-N2	MQ-N	S2	S	homozygous_ref	heterozygous	homozygous_ref
68b_S2'	react_agg	0/1	0/1	0/0	68b	MQ-N2	MQ-N	S2	S	heterozygous	heterozygous	homozygous_ref
70a_S2'	react_agg	0/1	0/0	0/0	70a	MQ-N2	MQ-N	S2	S	heterozygous	homozygous_ref	homozygous_ref
207a_S5'	react_agg	0/0	0/1	0/0	207a	MQ-N5	MQ-N	S5	S	homozygous_ref	heterozygous	homozygous_ref
219a_S5'	react_agg	0/0	0/1	0/1	219a	MQ-N5	MQ-N	S5	S	homozygous_ref	heterozygous	heterozygous
226a_S5'	react_agg	0/1	0/1	0/0	226a	MQ-N5	MQ-N	S5	S	heterozygous	heterozygous	homozygous_ref
554a_S5'	react_agg	0/0	0/1	0/0	554a	MQ-N5	MQ-N	S5	S	homozygous_ref	heterozygous	homozygous_ref
125a_N1'	react_agg	0/0	0/1	0/0	125a	SQ-N1	SQ-N	N1	N	homozygous_ref	heterozygous	homozygous_ref
402a_N1'	react_agg	0/1	0/1	0/0	402a	SQ-N1	SQ-N	N1	N	heterozygous	heterozygous	homozygous_ref
403b_N1'	react_agg	0/0	0/1	0/0	403b	SQ-N1	SQ-N	N1	N	homozygous_ref	heterozygous	homozygous_ref
404b_N1'	react_agg	0/0	0/1	0/0	404b	SQ-N1	SQ-N	N1	N	homozygous_ref	heterozygous	homozygous_ref
436b_N1'	react_agg	0/0	0/1	0/0	436b	SQ-N1	SQ-N	N1	N	homozygous_ref	heterozygous	homozygous_ref
302a_N4'	react_agg	0/0	0/1	0/0	302a	SQ-N4	SQ-N	N4	N	homozygous_ref	heterozygous	homozygous_ref
391b_N4'	react_agg	0/0	0/1	0/0	391b	SQ-N4	SQ-N	N4	N	homozygous_ref	heterozygous	homozygous_ref
567b_N4'	react_agg	0/0	0/1	0/0	567b	SQ-N4	SQ-N	N4	N	homozygous_ref	heterozygous	homozygous_ref
292a_N6'	react_agg	0/0	0/1	0/0	292a	SQ-N6	SQ-N	N6	N	homozygous_ref	heterozygous	homozygous_ref
294b_N6'	react_agg	0/0	0/1	0/0	294b	SQ-N6	SQ-N	N6	N	homozygous_ref	heterozygous	homozygous_ref
547b_A2'	react_agg	0/1	0/0	0/0	547b	SQ-A2	SQ-A	A2	A	heterozygous	homozygous_ref	homozygous_ref
382b_A5'	react_agg	0/0	0/1	0/0	382b	SQ-A5	SQ-A	A5	A	homozygous_ref	heterozygous	homozygous_ref
408b_A5'	react_agg	0/1	0/1	0/0	408b	SQ-A5	SQ-A	A5	A	heterozygous	heterozygous	homozygous_ref
551b_A5'	react_agg	0/0	0/1	0/0	551b	SQ-A5	SQ-A	A5	A	homozygous_ref	heterozygous	homozygous_ref
301b_A6'	react_agg	0/0	0/1	0/1	301b	SQ-A6	SQ-A	A6	A	homozygous_ref	heterozygous	heterozygous
363b_A6'	react_agg	0/0	0/1	0/0	363b	SQ-A6	SQ-A	A6	A	homozygous_ref	heterozygous	homozygous_ref
399b_A6'	react_agg	0/0	0/1	0/0	399b	SQ-A6	SQ-A	A6	A	homozygous_ref	heterozygous	homozygous_ref
447b_A6'	react_agg	0/0	0/1	0/0	447b	SQ-A6	SQ-A	A6	A	homozygous_ref	heterozygous	homozygous_ref
456a_A6'	react_agg	0/0	0/1	0/0	456a	SQ-A6	SQ-A	A6	A	homozygous_ref	heterozygous	homozygous_ref
459a_A6'	react_agg	0/1	0/1	0/0	459a	SQ-A6	SQ-A	A6	A	heterozygous	heterozygous	homozygous_ref
460a_A6'	react_agg	0/0	0/1	0/0	460a	SQ-A6	SQ-A	A6	A	homozygous_ref	heterozygous	homozygous_ref
530b_A6'	react_agg	0/0	0/1	0/0	530b	SQ-A6	SQ-A	A6	A	homozygous_ref	heterozygous	homozygous_ref
640b_A6'	react_agg	0/0	0/1	0/0	640b	SQ-A6	SQ-A	A6	A	homozygous_ref	heterozygous	homozygous_ref
237a_S1'	react_pcf	0/0	0/1	0/0	237a	MQ-N1	MQ-N	S1	S	homozygous_ref	heterozygous	homozygous_ref
256b_S1'	react_pcf	0/1	0/1	0/1	256b	MQ-N1	MQ-N	S1	S	heterozygous	heterozygous	heterozygous
454a_S1'	react_pcf	0/0	0/1	0/0	454a	MQ-N1	MQ-N	S1	S	homozygous_ref	heterozygous	homozygous_ref
584a_S1'	react_pcf	0/1	0/1	0/0	584a	MQ-N1	MQ-N	S1	S	heterozygous	heterozygous	homozygous_ref
117a_S2'	react_pcf	0/1	0/1	0/0	117a	MQ-N2	MQ-N	S2	S	heterozygous	heterozygous	homozygous_ref
260a_S2'	react_pcf	0/1	0/1	0/0	260a	MQ-N2	MQ-N	S2	S	heterozygous	heterozygous	homozygous_ref
501a_S2'	react_pcf	0/1	0/0	0/0	501a	MQ-N2	MQ-N	S2	S	heterozygous	homozygous_ref	homozygous_ref
642b_S2'	react_pcf	0/0	0/1	0/0	642b	MQ-N2	MQ-N	S2	S	homozygous_ref	heterozygous	homozygous_ref
235a_S5'	react_pcf	0/1	0/1	0/0	235a	MQ-N5	MQ-N	S5	S	heterozygous	heterozygous	homozygous_ref
304a_S5'	react_pcf	0/1	0/1	0/0	304a	MQ-N5	MQ-N	S5	S	heterozygous	heterozygous	homozygous_ref
383a_S5'	react_pcf	0/0	0/1	0/0	383a	MQ-N5	MQ-N	S5	S	homozygous_ref	heterozygous	homozygous_ref
385a_S5'	react_pcf	0/0	0/1	0/0	385a	MQ-N5	MQ-N	S5	S	homozygous_ref	heterozygous	homozygous_ref
559b_S5']	react_pcf	0/0	0/1	0/0	559b	MQ-N5	MQ-N	S5	S	homozygous_ref	heterozygous	homozygous_ref
405a_N1'	react_pcf	0/0	0/1	0/0	405a	SQ-N1	SQ-N	N1	N	homozygous_ref	heterozygous	homozygous_ref
450a_N1'	react_pcf	0/0	0/1	0/0	450a	SQ-N1	SQ-N	N1	N	homozygous_ref	heterozygous	homozygous_ref
452a_N1'	react_pcf	0/1	0/1	0/0	452a	SQ-N1	SQ-N	N1	N	heterozygous	heterozygous	homozygous_ref
50a_N1'	react_pcf	0/0	0/1	0/0	50a	SQ-N1	SQ-N	N1	N	homozygous_ref	heterozygous	homozygous_ref
566b_N4'	react_pcf	0/0	0/1	0/0	566b	SQ-N4	SQ-N	N4	N	homozygous_ref	heterozygous	homozygous_ref
217a_N6'	react_pcf	0/0	0/0	0/0	217a	SQ-N6	SQ-N	N6	N	homozygous_ref	homozygous_ref	homozygous_ref
218a_N6'	react_pcf	0/0	0/1	0/0	218a	SQ-N6	SQ-N	N6	N	homozygous_ref	heterozygous	homozygous_ref
390b_N6'	react_pcf	0/1	0/1	0/0	390b	SQ-N6	SQ-N	N6	N	heterozygous	heterozygous	homozygous_ref
435a_A2'	react_pcf	0/0	0/1	0/1	435a	SQ-A2	SQ-A	A2	A	homozygous_ref	heterozygous	heterozygous
49b_A2'	react_pcf	0/0	0/1	0/0	49b	SQ-A2	SQ-A	A2	A	homozygous_ref	heterozygous	homozygous_ref
54a_A5'	react_pcf	0/0	0/1	0/0	54a	SQ-A5	SQ-A	A5	A	homozygous_ref	heterozygous	homozygous_ref
101b_A6'	react_pcf	0/1	0/1	0/0	101b	SQ-A6	SQ-A	A6	A	heterozygous	heterozygous	homozygous_ref
206b_A6'	react_pcf	0/0	0/1	0/1	206b	SQ-A6	SQ-A	A6	A	homozygous_ref	heterozygous	heterozygous
446b_A6'	react_pcf	0/1	0/1	0/0	446b	SQ-A6	SQ-A	A6	A	heterozygous	heterozygous	homozygous_ref
59a_A6'	react_pcf	0/0	0/1	0/0	59a	SQ-A6	SQ-A	A6	A	homozygous_ref	heterozygous	homozygous_ref
641a_A6'	react_pcf	0/0	0/1	0/0	641a	SQ-A6	SQ-A	A6	A	homozygous_ref	heterozygous	homozygous_ref

## Sheet: Data_R
Sample_ID	beh	scaffold_185_110741	scaffold_163_28302	scaffold_11_2457277	scaffold_185_110741_	scaffold_163_28302_	scaffold_11_2457277_	beh_coded123	nest_internal	pop_internal	id	AI_worker	nest	pop
547b_A2'	react_agg	0/1	0/0	0/0	heterozygous	homozygous_ref	homozygous_ref	2	A2	A	547b	3.75882	SQ-A2	SQ-A
382b_A5'	react_agg	0/0	0/1	0/0	homozygous_ref	heterozygous	homozygous_ref	2	A5	A	382b	3.86471	SQ-A5	SQ-A
408b_A5'	react_agg	0/1	0/1	0/0	heterozygous	heterozygous	homozygous_ref	2	A5	A	408b	3.08824	SQ-A5	SQ-A
551b_A5'	react_agg	0/0	0/1	0/0	homozygous_ref	heterozygous	homozygous_ref	2	A5	A	551b	3.92941	SQ-A5	SQ-A
301b_A6'	react_agg	0/0	0/1	0/1	homozygous_ref	heterozygous	heterozygous	2	A6	A	301b	3.67647	SQ-A6	SQ-A
363b_A6'	react_agg	0/0	0/1	0/0	homozygous_ref	heterozygous	homozygous_ref	2	A6	A	363b	0.579882	SQ-A6	SQ-A
399b_A6'	react_agg	0/0	0/1	0/0	homozygous_ref	heterozygous	homozygous_ref	2	A6	A	399b	2.42941	SQ-A6	SQ-A
447b_A6'	react_agg	0/0	0/1	0/0	homozygous_ref	heterozygous	homozygous_ref	2	A6	A	447b	3.07059	SQ-A6	SQ-A
456a_A6'	react_agg	0/0	0/1	0/0	homozygous_ref	heterozygous	homozygous_ref	2	A6	A	456a	2.82941	SQ-A6	SQ-A
459a_A6'	react_agg	0/1	0/1	0/0	heterozygous	heterozygous	homozygous_ref	2	A6	A	459a	3.75294	SQ-A6	SQ-A
460a_A6'	react_agg	0/0	0/1	0/0	homozygous_ref	heterozygous	homozygous_ref	2	A6	A	460a	0.487952	SQ-A6	SQ-A
530b_A6'	react_agg	0/0	0/1	0/0	homozygous_ref	heterozygous	homozygous_ref	2	A6	A	530b	2.75	SQ-A6	SQ-A
640b_A6'	react_agg	0/0	0/1	0/0	homozygous_ref	heterozygous	homozygous_ref	2	A6	A	640b	1.61789	SQ-A6	SQ-A
125a_N1'	react_agg	0/0	0/1	0/0	homozygous_ref	heterozygous	homozygous_ref	2	N1	N	125a	2.16471	SQ-N1	SQ-N
402a_N1'	react_agg	0/1	0/1	0/0	heterozygous	heterozygous	homozygous_ref	2	N1	N	402a	3.54706	SQ-N1	SQ-N
403b_N1'	react_agg	0/0	0/1	0/0	homozygous_ref	heterozygous	homozygous_ref	2	N1	N	403b	4	SQ-N1	SQ-N
404b_N1'	react_agg	0/0	0/1	0/0	homozygous_ref	heterozygous	homozygous_ref	2	N1	N	404b	3.81765	SQ-N1	SQ-N
436b_N1'	react_agg	0/0	0/1	0/0	homozygous_ref	heterozygous	homozygous_ref	2	N1	N	436b	3.16438	SQ-N1	SQ-N
302a_N4'	react_agg	0/0	0/1	0/0	homozygous_ref	heterozygous	homozygous_ref	2	N4	N	302a	4	SQ-N4	SQ-N
391b_N4'	react_agg	0/0	0/1	0/0	homozygous_ref	heterozygous	homozygous_ref	2	N4	N	391b	2.65031	SQ-N4	SQ-N
567b_N4'	react_agg	0/0	0/1	0/0	homozygous_ref	heterozygous	homozygous_ref	2	N4	N	567b	3.62722	SQ-N4	SQ-N
292a_N6'	react_agg	0/0	0/1	0/0	homozygous_ref	heterozygous	homozygous_ref	2	N6	N	292a	2.32624	SQ-N6	SQ-N
294b_N6'	react_agg	0/0	0/1	0/0	homozygous_ref	heterozygous	homozygous_ref	2	N6	N	294b	4	SQ-N6	SQ-N
410b_S1'	react_agg	0/0	0/1	0/1	homozygous_ref	heterozygous	heterozygous	2	S1	S	410b	2.03797	MQ-N1	MQ-N
52a_S1'	react_agg	0/0	0/1	0/0	homozygous_ref	heterozygous	homozygous_ref	2	S1	S	52a	-0.951807	MQ-N1	MQ-N
57a_S1'	react_agg	0/1	0/1	0/0	heterozygous	heterozygous	homozygous_ref	2	S1	S	57a	-0.676471	MQ-N1	MQ-N
60a_S1'	react_agg	0/0	0/1	0/0	homozygous_ref	heterozygous	homozygous_ref	2	S1	S	60a	3.55882	MQ-N1	MQ-N
620b_S1'	react_agg	0/0	0/1	0/0	homozygous_ref	heterozygous	homozygous_ref	2	S1	S	620b	3.91765	MQ-N1	MQ-N
116a_S2'	react_agg	0/0	0/1	0/0	homozygous_ref	heterozygous	homozygous_ref	2	S2	S	116a	2.96471	MQ-N2	MQ-N
253b_S2'	react_agg	0/1	0/1	0/0	heterozygous	heterozygous	homozygous_ref	2	S2	S	253b	3.48824	MQ-N2	MQ-N
257a_S2'	react_agg	0/0	0/1	0/0	homozygous_ref	heterozygous	homozygous_ref	2	S2	S	257a	2.13125	MQ-N2	MQ-N
376a_S2'	react_agg	0/1	0/1	0/1	heterozygous	heterozygous	heterozygous	2	S2	S	376a	2.54412	MQ-N2	MQ-N
545b_S2'	react_agg	0/0	0/1	0/0	homozygous_ref	heterozygous	homozygous_ref	2	S2	S	545b	3.1875	MQ-N2	MQ-N
68b_S2'	react_agg	0/1	0/1	0/0	heterozygous	heterozygous	homozygous_ref	2	S2	S	68b	3.48101	MQ-N2	MQ-N
70a_S2'	react_agg	0/1	0/0	0/0	heterozygous	homozygous_ref	homozygous_ref	2	S2	S	70a	4	MQ-N2	MQ-N
207a_S5'	react_agg	0/0	0/1	0/0	homozygous_ref	heterozygous	homozygous_ref	2	S5	S	207a	3.64118	MQ-N5	MQ-N
219a_S5'	react_agg	0/0	0/1	0/1	homozygous_ref	heterozygous	heterozygous	2	S5	S	219a	3.77246	MQ-N5	MQ-N
226a_S5'	react_agg	0/1	0/1	0/0	heterozygous	heterozygous	homozygous_ref	2	S5	S	226a	3.44118	MQ-N5	MQ-N
554a_S5'	react_agg	0/0	0/1	0/0	homozygous_ref	heterozygous	homozygous_ref	2	S5	S	554a	-0.876471	MQ-N5	MQ-N
435a_A2'	react_pcf	0/0	0/1	0/1	homozygous_ref	heterozygous	heterozygous	1	A2	A	435a	-0.394737	SQ-A2	SQ-A
49b_A2'	react_pcf	0/0	0/1	0/0	homozygous_ref	heterozygous	homozygous_ref	1	A2	A	49b	-1.09467	SQ-A2	SQ-A
54a_A5'	react_pcf	0/0	0/1	0/0	homozygous_ref	heterozygous	homozygous_ref	1	A5	A	54a	0.982353	SQ-A5	SQ-A
101b_A6'	react_pcf	0/1	0/1	0/0	heterozygous	heterozygous	homozygous_ref	1	A6	A	101b	-1.29771	SQ-A6	SQ-A
206b_A6'	react_pcf	0/0	0/1	0/1	homozygous_ref	heterozygous	heterozygous	1	A6	A	206b	0.40566	SQ-A6	SQ-A
446b_A6'	react_pcf	0/1	0/1	0/0	heterozygous	heterozygous	homozygous_ref	1	A6	A	446b	-2	SQ-A6	SQ-A
59a_A6'	react_pcf	0/0	0/1	0/0	homozygous_ref	heterozygous	homozygous_ref	1	A6	A	59a	-0.994118	SQ-A6	SQ-A
641a_A6'	react_pcf	0/0	0/1	0/0	homozygous_ref	heterozygous	homozygous_ref	1	A6	A	641a	-0.724771	SQ-A6	SQ-A
405a_N1'	react_pcf	0/0	0/1	0/0	homozygous_ref	heterozygous	homozygous_ref	1	N1	N	405a	0.458647	SQ-N1	SQ-N
450a_N1'	react_pcf	0/0	0/1	0/0	homozygous_ref	heterozygous	homozygous_ref	1	N1	N	450a	0.840491	SQ-N1	SQ-N
452a_N1'	react_pcf	0/1	0/1	0/0	heterozygous	heterozygous	homozygous_ref	1	N1	N	452a	-0.028777	SQ-N1	SQ-N
50a_N1'	react_pcf	0/0	0/1	0/0	homozygous_ref	heterozygous	homozygous_ref	1	N1	N	50a	2	SQ-N1	SQ-N
566b_N4'	react_pcf	0/0	0/1	0/0	homozygous_ref	heterozygous	homozygous_ref	1	N4	N	566b	1.16216	SQ-N4	SQ-N
217a_N6'	react_pcf	0/0	0/0	0/0	homozygous_ref	homozygous_ref	homozygous_ref	1	N6	N	217a	-0.1	SQ-N6	SQ-N
218a_N6'	react_pcf	0/0	0/1	0/0	homozygous_ref	heterozygous	homozygous_ref	1	N6	N	218a	0.719008	SQ-N6	SQ-N
390b_N6'	react_pcf	0/1	0/1	0/0	heterozygous	heterozygous	homozygous_ref	1	N6	N	390b	-0.589286	SQ-N6	SQ-N
237a_S1'	react_pcf	0/0	0/1	0/0	homozygous_ref	heterozygous	homozygous_ref	1	S1	S	237a	0.958824	MQ-N1	MQ-N
256b_S1'	react_pcf	0/1	0/1	0/1	heterozygous	heterozygous	heterozygous	1	S1	S	256b	1.01176	MQ-N1	MQ-N
454a_S1'	react_pcf	0/0	0/1	0/0	homozygous_ref	heterozygous	homozygous_ref	1	S1	S	454a	-1.27778	MQ-N1	MQ-N
584a_S1'	react_pcf	0/1	0/1	0/0	heterozygous	heterozygous	homozygous_ref	1	S1	S	584a	-1.96471	MQ-N1	MQ-N
117a_S2'	react_pcf	0/1	0/1	0/0	heterozygous	heterozygous	homozygous_ref	1	S2	S	117a	0.0178571	MQ-N2	MQ-N
260a_S2'	react_pcf	0/1	0/1	0/0	heterozygous	heterozygous	homozygous_ref	1	S2	S	260a	-1.90179	MQ-N2	MQ-N
501a_S2'	react_pcf	0/1	0/0	0/0	heterozygous	homozygous_ref	homozygous_ref	1	S2	S	501a	-1	MQ-N2	MQ-N
642b_S2'	react_pcf	0/0	0/1	0/0	homozygous_ref	heterozygous	homozygous_ref	1	S2	S	642b	-1.64179	MQ-N2	MQ-N
235a_S5'	react_pcf	0/1	0/1	0/0	heterozygous	heterozygous	homozygous_ref	1	S5	S	235a	-0.338583	MQ-N5	MQ-N
304a_S5'	react_pcf	0/1	0/1	0/0	heterozygous	heterozygous	homozygous_ref	1	S5	S	304a	-0.424242	MQ-N5	MQ-N
383a_S5'	react_pcf	0/0	0/1	0/0	homozygous_ref	heterozygous	homozygous_ref	1	S5	S	383a	-1.18621	MQ-N5	MQ-N
385a_S5'	react_pcf	0/0	0/1	0/0	homozygous_ref	heterozygous	homozygous_ref	1	S5	S	385a	-1.18012	MQ-N5	MQ-N
559b_S5']	react_pcf	0/0	0/1	0/0	homozygous_ref	heterozygous	homozygous_ref	1	S5	S	559b	0.171053	MQ-N5	MQ-N
217b_A2'	start_agg	0/1	0/1	0/0	heterozygous	heterozygous	homozygous_ref	3	A2	A	217b	3.42857	SQ-A2	SQ-A
292b_A2'	start_agg	0/1	0/1	0/0	heterozygous	heterozygous	homozygous_ref	3	A2	A	292b	-0.0597015	SQ-A2	SQ-A
372b_A5'	start_agg	0/0	0/0	0/0	homozygous_ref	homozygous_ref	homozygous_ref	3	A5	A	372b	3.98824	SQ-A5	SQ-A
403a_A5'	start_agg	0/0	0/0	0/0	homozygous_ref	homozygous_ref	homozygous_ref	3	A5	A	403a	4	SQ-A5	SQ-A
404a_A5'	start_agg	0/1	0/0	0/0	heterozygous	homozygous_ref	homozygous_ref	3	A5	A	404a	3.24118	SQ-A5	SQ-A
405b_A5'	start_agg	0/0	0/0	0/0	homozygous_ref	homozygous_ref	homozygous_ref	3	A5	A	405b	3.9	SQ-A5	SQ-A
450b_A5'	start_agg	0/0	0/0	0/0	homozygous_ref	homozygous_ref	homozygous_ref	3	A5	A	450b	3.86982	SQ-A5	SQ-A
452b_A5'	start_agg	0/1	0/0	0/0	heterozygous	homozygous_ref	homozygous_ref	3	A5	A	452b	2	SQ-A5	SQ-A
566a_A6'	start_agg	0/1	0/1	0/0	heterozygous	heterozygous	homozygous_ref	3	A6	A	566a	2.58824	SQ-A6	SQ-A
567a_A6'	start_agg	0/1	0/1	0/0	heterozygous	heterozygous	homozygous_ref	3	A6	A	567a	-0.175325	SQ-A6	SQ-A
59b_N1'	start_agg	0/1	0/1	0/0	heterozygous	heterozygous	homozygous_ref	3	N1	N	59b	3.96471	SQ-N1	SQ-N
226b_N4'	start_agg	0/1	0/1	0/0	heterozygous	heterozygous	homozygous_ref	3	N4	N	226b	4	SQ-N4	SQ-N
237b_N4'	start_agg	0/1	0/0	0/0	heterozygous	homozygous_ref	homozygous_ref	3	N4	N	237b	3.22353	SQ-N4	SQ-N
301a_N4'	start_agg	0/0	0/0	0/0	homozygous_ref	homozygous_ref	homozygous_ref	3	N4	N	301a	3.7	SQ-N4	SQ-N
459b_N4'	start_agg	0/1	0/1	0/0	heterozygous	heterozygous	homozygous_ref	3	N4	N	459b	4	SQ-N4	SQ-N
460b_N4'	start_agg	0/1	0/0	0/0	heterozygous	homozygous_ref	homozygous_ref	3	N4	N	460b	1.03937	SQ-N4	SQ-N
559a_N4'	start_agg	0/1	0/0	0/0	heterozygous	homozygous_ref	homozygous_ref	3	N4	N	559a	4	SQ-N4	SQ-N
206a_N6'	start_agg	0/0	0/0	0/0	homozygous_ref	homozygous_ref	homozygous_ref	3	N6	N	206a	3.54706	SQ-N6	SQ-N
547a_N6'	start_agg	0/0	0/1	0/0	homozygous_ref	heterozygous	homozygous_ref	3	N6	N	547a	3.62941	SQ-N6	SQ-N
620a_N6'	start_agg	0/1	0/0	0/0	heterozygous	homozygous_ref	homozygous_ref	3	N6	N	620a	3.00588	SQ-N6	SQ-N
101a_S1'	start_agg	0/1	0/1	0/1	heterozygous	heterozygous	heterozygous	3	S1	S	101a	3.93529	MQ-N1	MQ-N
218b_S1'	start_agg	0/1	0/1	0/1	heterozygous	heterozygous	heterozygous	3	S1	S	218b	3.85882	MQ-N1	MQ-N
294a_S1'	start_agg	0/0	0/1	0/0	homozygous_ref	heterozygous	homozygous_ref	3	S1	S	294a	3.29412	MQ-N1	MQ-N
390a_S1'	start_agg	0/1	0/1	0/0	heterozygous	heterozygous	homozygous_ref	3	S1	S	390a	3.95294	MQ-N1	MQ-N
399a_S1'	start_agg	0/1	0/1	0/0	heterozygous	heterozygous	homozygous_ref	3	S1	S	399a	3.81765	MQ-N1	MQ-N
408a_S1'	start_agg	0/1	0/1	0/0	heterozygous	heterozygous	homozygous_ref	3	S1	S	408a	3.32353	MQ-N1	MQ-N
435b_S1'	start_agg	0/0	0/0	0/1	homozygous_ref	homozygous_ref	heterozygous	3	S1	S	435b	2.67066	MQ-N1	MQ-N
446a_S1'	start_agg	0/1	0/0	0/1	heterozygous	homozygous_ref	heterozygous	3	S1	S	446a	3.75882	MQ-N1	MQ-N
447a_S1'	start_agg	0/0	0/1	0/0	homozygous_ref	heterozygous	homozygous_ref	3	S1	S	447a	-0.947059	MQ-N1	MQ-N
49a_S1'	start_agg	0/1	0/1	0/0	heterozygous	heterozygous	homozygous_ref	3	S1	S	49a	3.29762	MQ-N1	MQ-N
125b_S2'	start_agg	0/1	0/1	0/0	heterozygous	heterozygous	homozygous_ref	3	S2	S	125b	3.38235	MQ-N2	MQ-N
436a_S2'	start_agg	0/1	0/0	0/1	heterozygous	homozygous_ref	heterozygous	3	S2	S	436a	2.08696	MQ-N2	MQ-N
497a_S2'	start_agg	0/1	0/1	0/0	heterozygous	heterozygous	homozygous_ref	3	S2	S	497a	3.52353	MQ-N2	MQ-N
50b_S2'	start_agg	0/1	0/1	0/0	heterozygous	heterozygous	homozygous_ref	3	S2	S	50b	3.44706	MQ-N2	MQ-N
640a_S2'	start_agg	0/1	0/1	0/0	heterozygous	heterozygous	homozygous_ref	3	S2	S	640a	-1.52174	MQ-N2	MQ-N
222b_S5'	start_agg	0/1	0/0	0/0	heterozygous	homozygous_ref	homozygous_ref	3	S5	S	222b	3.97647	MQ-N5	MQ-N
227a_S5'	start_agg	0/1	0/1	0/0	heterozygous	heterozygous	homozygous_ref	3	S5	S	227a	3.31765	MQ-N5	MQ-N
302b_S5'	start_agg	0/1	0/0	0/0	heterozygous	homozygous_ref	homozygous_ref	3	S5	S	302b	4	MQ-N5	MQ-N
391a_S5'	start_agg	0/0	0/1	0/0	homozygous_ref	heterozygous	homozygous_ref	3	S5	S	391a	3.51765	MQ-N5	MQ-N
402b_S5'	start_agg	0/1	0/1	0/0	heterozygous	heterozygous	homozygous_ref	3	S5	S	402b	3.99412	MQ-N5	MQ-N
551a_S5'	start_agg	0/1	0/0	0/0	heterozygous	homozygous_ref	homozygous_ref	3	S5	S	551a	3.25294	MQ-N5	MQ-N
