# Supplementary material for: The gut microbiome, single nucleotide polymorphisms, and differentially expressed genes promote aggression in an ant
Source: Research Square preprint supplement (doi:10.21203/rs.3.rs-8539228/v1), 2026-01-09
Supplement: Supplementary file 8 [file ForR_otu_metadata_rarefied.xlsx]

## Sheet: OTU_transposed_Count>100
Video_id	Sample	beh	Reaction	Colony	Population	OTU_2	OTU_7	OTU_13	OTU_58	OTU_123	OTU_366	OTU_370	OTU_732	OTU_805	OTU_1251	OTU_1420	OTU_2442	OTU_4581	OTU_4806	OTU_6011	OTU_7292	OTU_8545	OTU_8711	OTU_11261	OTU_11830	OTU_16228	OTU_18490	OTU_19145	OTU_23916	OTU_14	OTU_17	OTU_21	OTU_44	OTU_60	OTU_84	OTU_90	OTU_139	OTU_180	OTU_243	OTU_266	OTU_297	OTU_436	OTU_443	OTU_600	OTU_623	OTU_1002	OTU_1598	OTU_5256	OTU_6364
356a	Nu.ctrl.356a	ctrl_freeze	control	SQ-N6	SQ-N	267	5	92	19	0	0	11	1	0	0	0	0	1	0	76	0	0	2	3	0	0	19	17	51	29	43	25	14	10	1	9	6	8	5	3	1	1	7	1	8	0	0	5	0
166b	Nu.ctrl.166b	ctrl_freeze	control	SQ-N6	SQ-N	98	0	26	6	0	0	0	0	0	0	0	0	0	2	50	0	0	0	1	1	0	6	8	8	13	8	16	2	2	0	6	0	2	2	2	0	0	0	0	0	0	0	0	0
153b	Nu.ctrl.153b	ctrl_freeze	control	SQ-N6	SQ-N	286	8	24	3	6	0	4	0	4	0	0	1	0	0	114	0	4	2	1	2	0	17	13	43	296	169	156	42	44	5	24	9	8	2	6	0	3	6	0	4	0	1	3	0
194b	A5.ctrl.194b	ctrl_freeze	control	SQ-A5	SQ-A	1019	9	98	11	10	0	19	2	0	0	0	3	1	0	149	0	16	0	3	1	2	255	28	321	63	185	61	34	41	10	49	23	5	9	31	9	8	0	1	14	4	1	1	9
271b	A5.ctrl.271b	ctrl_freeze	control	SQ-A5	SQ-A	2063	1212	875	80	47	0	11	0	4	1	9	7	7	0	92	0	15	2	7	1	0	59	6	358	73	296	129	80	77	1	194	41	1	60	26	3	1	4	0	15	0	0	3	4
271a	A5.ctrl.271a	ctrl_freeze	control	SQ-A5	SQ-A	3471	21	5448	484	259	10	6	3	40	31	0	1	6	0	69	5	3	4	14	1	3	28	1	186	181	83	120	26	31	0	15	27	3	4	6	1	93	6	87	5	2	0	0	1
272b	A6.ctrl.272b	ctrl_freeze	control	SQ-A6	SQ-A	1481	13	601	73	41	2	9	1	0	0	0	1	1	2	58	11	1	11	4	1	2	16	1	91	286	913	1258	97	245	9	174	66	5	58	12	6	1	30	3	20	2	4	0	4
140b	Nu.ctrl.140b	ctrl_freeze	control	SQ-N6	SQ-N	464	828	42	17	1	2	5	1	3	1	10	2	3	3	249	0	8	0	5	2	1	34	36	208	116	153	101	59	31	0	196	31	12	8	3	0	1	4	2	2	0	0	2	5
356b	Nu.ctrl.356b	ctrl_freeze	control	SQ-N1	SQ-N	232	39	53	9	4	1	4	6	2	11	0	3	1	1	2810	0	10	0	1	25	1	102	388	56	29	15	25	4	9	0	2	2	2	1	2	0	2	2	8	1	0	0	1	0
196a	A6.ctrl.196a	ctrl_freeze	control	SQ-A6	SQ-A	1301	31	159	23	2	1	22	6	10	4	0	6	7	1	255	0	3	5	11	5	0	95	17	139	128	226	106	145	134	13	156	16	20	39	73	17	0	20	0	4	2	0	3	9
166a	Nu.ctrl.166a	ctrl_freeze	control	SQ-N1	SQ-N	634	21	180	34	2	3	18	7	21	3	0	1	3	11	210	2	9	7	1	2	0	51	29	86	109	522	1074	56	232	11	102	45	94	45	16	8	3	12	9	28	14	17	0	1
140a	Nu.ctrl.140a	ctrl_freeze	control	SQ-N1	SQ-N	1022	27	536	50	24	6	28	13	50	41	0	0	1	8	295	2	10	2	11	7	3	142	45	180	294	194	158	80	40	3	46	31	12	12	13	2	162	7	123	5	4	0	2	0
194a	A5.ctrl.194a	ctrl_freeze	control	SQ-A5	SQ-A	1663	24	117	13	1	2	20	0	3	0	0	4	16	3	141	0	12	3	5	6	0	80	20	168	106	250	183	101	83	1	101	35	11	26	42	11	1	25	1	7	1	0	1	13
272a	A6.ctrl.272a	ctrl_freeze	control	SQ-A6	SQ-A	1774	58	1250	117	72	4	6	1	0	0	0	4	3	0	396	3	2	2	3	6	0	32	15	167	321	229	264	104	67	4	44	74	22	14	4	1	2	13	0	4	2	1	0	0
196b	A6.ctrl.196b	ctrl_freeze	control	SQ-A6	SQ-A	4947	50	1013	132	105	2	5	0	2	0	0	0	14	3	169	0	1	2	7	2	0	12	0	135	519	476	350	118	168	1	84	76	16	27	6	0	0	28	1	11	17	0	3	2
280b	N6.Ragg.280b	ctrl_freeze	ragg	SQ-N6	SQ-N	296	4	177	19	3	6	10	0	0	1	0	0	0	0	14	0	2	0	1	0	0	10	0	27	721	174	160	105	35	0	27	20	9	9	1	4	0	5	0	2	1	9	0	0
433a	N1.Ragg.433a	react_agg	ragg	SQ-N1	SQ-N	909	21	190	30	7	9	4	1	0	1	0	11	4	1	72	1	20	3	21	0	0	266	13	302	94	261	82	52	58	3	81	27	22	7	27	19	1	3	0	7	0	8	2	9
102b	A6.Ragg.102b	react_agg	ragg	SQ-A6	SQ-A	533	41	468	59	20	10	5	1	1	0	0	2	0	3	75	6	7	1	18	1	12	75	1	157	68	854	53	16	27	4	138	11	3	4	7	116	1	13	0	8	4	1	11	1
364b	N6.Ragg.364b	react_agg	ragg	SQ-N6	SQ-N	319	3	122	8	1	9	16	0	0	2	0	0	0	1	13	5	1	0	1	0	0	12	0	35	183	212	169	51	50	1	42	23	35	10	2	9	0	168	0	1	0	2	8	0
47a	N1.Ragg.47a	react_agg	ragg	SQ-N1	SQ-N	851	11210	227	45	1	0	10	2	0	0	72	48	7	2	90	0	64	3	5	11	1	26	2	1872	354	181	119	85	35	2	218	35	6	14	3	0	4	3	0	6	0	1	0	1
56a	A5.Ragg.56a	react_agg	ragg	SQ-A5	SQ-A	652	9	704	79	33	4	18	5	0	2	0	2	1	0	38	3	3	11	2	0	0	16	0	38	1487	491	314	212	34	0	37	24	8	19	14	6	1	11	0	8	1	0	0	1
94a	N1.Ragg.94a	react_agg	ragg	SQ-N1	SQ-N	297	15	289	39	20	2	5	1	0	1	0	0	0	0	32	1	4	17	2	1	1	15	0	40	207	306	126	37	35	3	30	7	9	8	4	14	1	19	2	8	1	1	4	2
281b	N6.Ragg.281b	react_agg	ragg	SQ-N6	SQ-N	391	25	204	25	3	7	2	2	0	0	0	3	0	0	59	1	4	2	4	7	3	32	3	51	260	114	85	39	20	2	23	17	18	4	0	2	0	3	0	5	0	1	1	1
114a	A5.Ragg.114a	react_agg	ragg	SQ-A5	SQ-A	450	4	498	113	23	8	9	3	0	2	0	0	3	0	12	4	0	2	9	0	0	15	0	20	1681	469	389	240	46	2	73	27	5	10	7	2	0	26	0	16	0	2	0	4
90b	A5.Ragg.90b	react_agg	ragg	SQ-A5	SQ-A	823	21	458	34	18	3	9	1	0	0	1	0	0	5	13	2	0	3	1	0	1	25	0	71	191	302	195	48	49	0	74	22	2	12	3	10	0	262	0	8	3	0	14	1
279b	A6.Ragg.279b	react_agg	ragg	SQ-A6	SQ-A	794	18	296	72	17	6	29	5	0	1	0	4	3	0	26	2	9	0	19	1	4	51	2	74	61	118	79	30	24	5	39	10	2	11	24	4	1	9	0	6	0	0	0	0
92b	A5.Ragg.92b	react_agg	ragg	SQ-A5	SQ-A	298	10	285	28	4	0	2	0	0	0	0	0	0	0	15	0	5	1	1	0	0	6	2	50	38	31	13	3	11	1	2	3	0	0	0	2	0	2	0	1	0	0	0	0
61a	A6.Ragg.61a	react_agg	ragg	SQ-A6	SQ-A	910	143	698	83	15	14	20	2	3	0	0	1	0	0	264	2	2	4	3	1	7	56	17	105	602	338	204	112	44	0	50	30	3	7	17	10	1	10	1	9	2	0	2	5
126b	N1.Ragg.126b	react_agg	ragg	SQ-N1	SQ-N	658	51	556	80	8	20	24	14	0	0	0	15	1	0	66	0	5	1	10	0	1	58	3	76	1572	412	486	259	97	0	55	26	13	7	1	1	0	4	0	33	3	8	0	0
394b	A6.Ragg.394b	react_agg	ragg	SQ-A6	SQ-A	1489	63	510	45	51	34	21	3	0	0	0	8	5	1	175	0	18	6	8	8	4	126	8	156	89	170	67	57	72	1	45	32	182	39	15	51	2	3	0	12	5	34	2	1
291a	N6.Ragg.291a	react_agg	ragg	SQ-N6	SQ-N	756	4	82	15	1	2	11	0	0	0	0	1	4	3	43	0	11	1	2	4	1	35	3	42	147	79	56	24	20	0	16	5	8	2	6	3	0	10	0	1	1	0	4	0
386b	A5.Rpcf.386b	react_agg	rpcf	SQ-A5	SQ-A	375	9	193	45	16	11	16	0	0	1	0	1	0	2	33	7	4	8	6	4	2	31	1	47	226	177	159	88	70	0	65	28	36	12	3	13	3	9	0	12	5	4	2	0
532a	A6.Rpcf.532a	react_pcf	rpcf	SQ-A6	SQ-A	724	515	912	139	1	0	10	7	14	11	0	3	3	23	100	13	7	7	8	5	12	22	2	243	192	226	270	71	36	8	44	12	15	6	1	1	11	5	7	9	0	2	2	0
74a	A5.Rpcf.74a	react_pcf	rpcf	SQ-A5	SQ-A	744	15	238	31	5	2	31	2	0	0	0	1	2	6	44	0	9	1	9	0	6	18	0	89	206	1026	979	86	281	6	101	56	14	44	33	37	0	94	1	22	3	0	6	0
539a	N6.Rpcf.539a	react_pcf	rpcf	SQ-N6	SQ-N	332	323	130	39	0	0	2	4	6	5	1	1	0	0	313	0	13	0	0	7	1	13	19	93	49	27	10	13	3	0	9	1	1	0	0	2	0	0	0	0	0	0	0	0
248a	A5.Rpcf.248a	react_pcf	rpcf	SQ-A5	SQ-A	149	0	174	23	5	0	6	0	0	0	0	0	0	0	3	0	1	2	4	0	1	6	0	22	31	19	21	3	1	0	1	3	1	0	1	0	0	2	0	0	0	0	0	0
99a	A6.Rpcf.99a	react_pcf	rpcf	SQ-A6	SQ-A	1195	95	1254	149	100	13	49	2	0	2	1	5	0	6	185	0	2	7	2	8	4	106	16	198	82	150	52	18	39	2	28	15	31	11	8	14	0	11	0	8	0	3	1	3
499a	A6.Rpcf.499a	react_pcf	rpcf	SQ-A6	SQ-A	2740	499	335	61	4	0	15	6	2	0	1	3	21	5	177	0	14	4	18	0	3	17	4	237	1344	471	283	243	57	7	121	22	7	3	3	0	4	7	3	32	1	3	2	0
63b	N1.Rpcf.63b	react_pcf	rpcf	SQ-N1	SQ-N	2082	36	396	56	14	1	6	3	0	0	0	2	10	2	66	0	7	0	4	1	3	24	0	81	647	299	148	90	47	4	44	12	3	3	5	8	0	17	0	9	0	0	6	5
229a	A5.Rpcf.229a	react_pcf	rpcf	SQ-A5	SQ-A	828	20	2111	236	98	13	92	2	0	5	0	0	2	1	62	10	7	4	5	4	1	82	8	96	105	347	160	46	44	2	67	15	17	24	16	8	0	9	0	12	0	0	2	0
443b	N1.Rpcf.443b	react_pcf	rpcf	SQ-N1	SQ-N	1117	567	658	103	18	0	8	14	24	28	0	4	4	3	76	2	16	2	3	0	4	24	2	237	983	263	214	161	46	3	56	23	7	3	5	0	172	11	113	16	0	1	2	1
563b	A6.Rpcf.563b	react_pcf	rpcf	SQ-A6	SQ-A	819	29	118	31	12	0	10	3	4	0	0	0	5	3	276	0	1	4	1	6	1	40	42	77	1727	819	595	291	258	1	121	97	24	7	5	9	2	22	5	25	5	2	1	4
215a	N6.Rpcf.215a	react_pcf	rpcf	SQ-N6	SQ-N	201	3	118	18	3	1	12	0	0	0	0	1	3	0	12	1	2	1	5	1	0	9	3	23	89	116	119	28	29	0	17	2	3	8	9	2	0	14	0	1	0	0	1	0
406a	N1.Rpcf.406a	react_pcf	rpcf	SQ-N1	SQ-N	581	55	242	19	5	17	7	1	0	0	0	4	4	0	70	2	20	2	73	1	7	53	2	186	51	47	28	11	8	0	7	8	5	15	2	0	0	0	0	5	0	0	0	0
541a	N6.Rpcf.541a	react_pcf	rpcf	SQ-N6	SQ-N	287	202	71	10	0	0	2	0	0	0	0	0	2	0	21	1	10	0	0	1	1	34	0	73	39	46	18	5	2	1	3	2	2	0	2	1	0	0	0	2	0	0	0	1
86a	N1.Rpcf.86a	react_pcf	rpcf	SQ-N1	SQ-N	845	51	810	65	21	14	35	0	0	7	0	4	2	0	81	2	5	1	8	0	0	58	3	149	51	161	107	15	38	4	43	12	14	10	14	4	0	7	3	6	1	1	2	2
538a	N6.Rpcf.538a	react_pcf	rpcf	SQ-N6	SQ-N	114	141	95	19	3	0	2	0	0	0	0	0	0	1	10	1	1	0	0	0	2	3	0	33	17	10	9	6	4	0	6	0	0	0	0	0	0	0	0	0	0	0	0	0
361b	N6.Rpcf.361b	react_pcf	rpcf	SQ-N6	SQ-N	805	19	453	38	25	30	32	1	0	4	0	1	1	0	49	1	7	0	7	1	7	76	3	138	115	397	627	56	152	1	80	43	96	60	9	7	2	8	0	2	3	14	2	0
279a	N6.Sagg.279a	react_pcf	sagg	SQ-N6	SQ-N	678	37	642	104	58	10	28	2	0	1	0	0	1	9	77	7	5	2	5	4	6	74	6	99	81	107	56	26	31	0	14	10	36	9	5	7	0	0	0	7	0	2	0	0
443a	A6.Sagg.443a	start_agg	sagg	SQ-A6	SQ-A	1138	556	253	40	12	0	7	2	0	0	3	2	6	2	263	2	12	4	8	8	1	21	12	151	1652	844	438	271	198	1	94	77	8	6	6	0	0	21	2	13	2	0	8	4
53b	N1.Sagg.53b	start_agg	sagg	SQ-N1	SQ-N	1281	442	207	39	3	6	24	1	1	0	0	3	1	2	55	1	9	1	14	0	5	47	4	243	214	601	1006	85	198	5	115	33	78	45	33	6	2	20	5	13	0	4	2	7
99b	N1.Sagg.99b	start_agg	sagg	SQ-N1	SQ-N	488	27	267	21	17	2	1	0	0	1	0	0	1	0	45	2	8	2	10	1	9	26	0	70	38	55	33	10	8	0	10	5	0	3	4	0	0	3	0	0	1	0	1	3
285b	A5.Sagg.285b	start_agg	sagg	SQ-A5	SQ-A	1032	4	123	27	7	6	10	3	0	0	0	1	0	0	37	0	6	5	4	2	0	33	2	77	1085	294	322	259	41	2	30	30	28	4	2	3	0	4	0	14	1	1	0	0
62a	N1.Sagg.62a	start_agg	sagg	SQ-N1	SQ-N	391	17	215	20	6	0	6	2	0	0	0	0	1	0	29	0	3	3	1	0	1	10	2	23	283	173	72	67	6	0	18	4	3	5	2	6	0	0	0	7	1	0	0	0
262a	A6.Sagg.262a	start_agg	sagg	SQ-A6	SQ-A	239	3	302	169	15	0	18	1	0	1	0	2	0	0	30	10	3	2	5	0	0	23	2	25	271	177	156	55	57	0	38	13	4	8	3	2	0	11	1	12	2	1	1	1
247b	A5.Sagg.247b	start_agg	sagg	SQ-A5	SQ-A	606	10	315	49	5	2	69	8	0	0	0	5	0	6	23	2	5	1	5	0	0	26	1	52	377	742	1115	109	233	7	165	39	2	76	13	7	2	324	0	16	0	1	13	4
538b	A5.Sagg.538b	start_agg	sagg	SQ-A5	SQ-A	1508	384	507	139	4	0	49	0	1	11	5	0	7	0	55	1	16	17	3	7	9	59	6	330	132	302	79	81	79	3	65	18	0	19	8	1	4	47	0	31	0	0	28	2
202a	N6.Sagg.202a	start_agg	sagg	SQ-N6	SQ-N	370	4	187	51	8	3	10	4	0	1	0	3	2	0	18	1	1	1	5	2	0	22	0	21	232	101	93	76	13	0	19	13	3	2	4	2	0	4	0	2	0	0	0	0
51a	N1.Sagg.51a	start_agg	sagg	SQ-N1	SQ-N	750	386	156	28	1	0	12	3	2	0	0	5	1	0	55	0	9	5	2	0	2	14	1	132	1837	450	510	270	63	12	118	33	5	9	1	4	5	13	0	33	0	0	1	2
280a	A6.Sagg.280a	start_agg	sagg	SQ-A6	SQ-A	676	9	346	53	21	5	16	0	0	1	0	1	1	2	58	1	8	1	28	1	7	130	4	176	112	308	85	43	40	4	44	29	3	4	34	26	0	8	2	12	2	2	1	3
361a	A6.Sagg.361a	start_agg	sagg	SQ-A6	SQ-A	410	6	59	14	2	2	6	4	0	2	0	1	0	0	24	1	6	6	5	0	0	16	1	34	196	132	126	37	21	0	8	9	11	7	1	4	1	8	0	8	0	1	0	0
378b	N6.Sagg.378b	start_agg	sagg	SQ-N6	SQ-N	200	12	93	7	0	4	2	0	0	0	0	0	0	0	14	0	2	0	0	0	0	8	0	22	19	7	13	4	4	0	2	1	4	2	2	0	0	4	0	0	0	0	0	0
541b	A5.Sagg.541b	start_agg	sagg	SQ-A5	SQ-A	1558	433	641	83	2	1	20	2	2	1	4	8	6	4	83	3	11	4	4	6	0	78	8	202	200	195	108	99	81	5	101	28	10	26	28	10	3	12	2	8	8	0	0	2
212b	N6.Sagg.212b	start_agg	sagg	SQ-N6	SQ-N	503	10	214	28	14	4	6	0	0	0	0	3	2	0	18	0	5	1	0	0	2	14	1	26	214	85	66	40	14	0	17	0	0	2	0	1	0	7	0	6	0	0	0	0
exclude						k__Bacteria	k__Bacteria	k__Bacteria	k__Bacteria	k__Bacteria	k__Bacteria	k__Bacteria	k__Bacteria	k__Bacteria	k__Bacteria	k__Bacteria	k__Bacteria	k__Bacteria	k__Bacteria	k__Bacteria	k__Bacteria	k__Bacteria	k__Bacteria	k__Bacteria	k__Bacteria	k__Bacteria	k__Bacteria	k__Bacteria	k__Bacteria	k__Bacteria	k__Bacteria	k__Bacteria	k__Bacteria	k__Bacteria	k__Bacteria	k__Bacteria	k__Bacteria	k__Bacteria	k__Bacteria	k__Bacteria	k__Bacteria	k__Bacteria	k__Bacteria	k__Bacteria	k__Bacteria	k__Bacteria	k__Bacteria	k__Bacteria	k__Bacteria
exclude						p__Proteobacteria	p__Proteobacteria	p__Proteobacteria	p__Proteobacteria	p__Proteobacteria	p__Proteobacteria	p__Proteobacteria	p__Proteobacteria	p__Proteobacteria	p__Proteobacteria	p__Proteobacteria	p__Proteobacteria	p__Proteobacteria	p__Proteobacteria	p__Proteobacteria	p__Proteobacteria	p__Proteobacteria	p__Proteobacteria	p__Proteobacteria	p__Proteobacteria	p__Proteobacteria	p__Proteobacteria	p__Proteobacteria	p__Proteobacteria	p__Bacteroidota	p__Bacteroidota	p__Bacteroidota	p__Bacteroidota	p__Bacteroidota	p__Bacteroidota	p__Bacteroidota	p__Bacteroidota	p__Bacteroidota	p__Bacteroidota	p__Bacteroidota	p__Bacteroidota	p__Bacteroidota	p__Bacteroidota	p__Bacteroidota	p__Bacteroidota	p__Bacteroidota	p__Bacteroidota	p__Bacteroidota	p__Bacteroidota
exclude						c__Gammaproteobacteria	c__Gammaproteobacteria	c__Gammaproteobacteria	c__Gammaproteobacteria	c__Gammaproteobacteria	c__Gammaproteobacteria	c__Gammaproteobacteria	c__Gammaproteobacteria	c__Gammaproteobacteria	c__Gammaproteobacteria	c__Gammaproteobacteria	c__Gammaproteobacteria	c__Gammaproteobacteria	c__Gammaproteobacteria	c__Gammaproteobacteria	c__Gammaproteobacteria	c__Gammaproteobacteria	c__Gammaproteobacteria	c__Gammaproteobacteria	c__Gammaproteobacteria	c__Gammaproteobacteria	c__Gammaproteobacteria	c__Gammaproteobacteria	c__Gammaproteobacteria	c__Bacteroidia	c__Bacteroidia	c__Bacteroidia	c__Bacteroidia	c__Bacteroidia	c__Bacteroidia	c__Bacteroidia	c__Bacteroidia	c__Bacteroidia	c__Bacteroidia	c__Bacteroidia	c__Bacteroidia	c__Bacteroidia	c__Bacteroidia	c__Bacteroidia	c__Bacteroidia	c__Bacteroidia	c__Bacteroidia	c__Bacteroidia	c__Bacteroidia
exclude						o__Pseudomonadales	o__Pseudomonadales	o__Pseudomonadales	o__Pseudomonadales	o__Pseudomonadales	o__Pseudomonadales	o__Pseudomonadales	o__Pseudomonadales	o__Pseudomonadales	o__Pseudomonadales	o__Pseudomonadales	o__Pseudomonadales	o__Pseudomonadales	o__Pseudomonadales	o__Pseudomonadales	o__Pseudomonadales	o__Pseudomonadales	o__Pseudomonadales	o__Pseudomonadales	o__Pseudomonadales	o__Pseudomonadales	o__Pseudomonadales	o__Pseudomonadales	o__Pseudomonadales	o__Bacteroidales	o__Bacteroidales	o__Bacteroidales	o__Bacteroidales	o__Bacteroidales	o__Bacteroidales	o__Bacteroidales	o__Bacteroidales	o__Bacteroidales	o__Bacteroidales	o__Bacteroidales	o__Bacteroidales	o__Bacteroidales	o__Bacteroidales	o__Bacteroidales	o__Bacteroidales	o__Bacteroidales	o__Bacteroidales	o__Bacteroidales	o__Bacteroidales
exclude						f__Pseudomonadaceae	f__Pseudomonadaceae	f__Pseudomonadaceae	f__Pseudomonadaceae	f__Pseudomonadaceae	f__Pseudomonadaceae	f__Pseudomonadaceae	f__Pseudomonadaceae	f__Pseudomonadaceae	f__Pseudomonadaceae	f__Pseudomonadaceae	f__Pseudomonadaceae	f__Pseudomonadaceae	f__Pseudomonadaceae	f__Pseudomonadaceae	f__Pseudomonadaceae	f__Pseudomonadaceae	f__Pseudomonadaceae	f__Pseudomonadaceae	f__Pseudomonadaceae	f__Pseudomonadaceae	f__Pseudomonadaceae	f__Pseudomonadaceae	f__Pseudomonadaceae	f__Bacteroidaceae	f__Bacteroidaceae	f__Bacteroidaceae	f__Bacteroidaceae	f__Bacteroidaceae	f__Bacteroidaceae	f__Bacteroidaceae	f__Bacteroidaceae	f__Bacteroidaceae	f__Bacteroidaceae	f__Bacteroidaceae	f__Bacteroidaceae	f__Bacteroidaceae	f__Bacteroidaceae	f__Bacteroidaceae	f__Bacteroidaceae	f__Bacteroidaceae	f__Bacteroidaceae	f__Bacteroidaceae	f__Bacteroidaceae
exclude						g__Pseudomonas	g__Pseudomonas	g__Pseudomonas	g__Pseudomonas	g__Pseudomonas	g__Pseudomonas	g__Pseudomonas	g__Pseudomonas	g__Pseudomonas	g__Pseudomonas	g__Pseudomonas	g__Pseudomonas	g__Pseudomonas	g__Pseudomonas	g__Pseudomonas	g__Pseudomonas	g__Pseudomonas	g__Pseudomonas	g__Pseudomonas	g__Pseudomonas	g__Pseudomonas	g__Pseudomonas	g__Pseudomonas	g__Pseudomonas	g__Bacteroides	g__Bacteroides	g__Bacteroides	g__Bacteroides	g__Bacteroides	g__Bacteroides	g__Bacteroides	g__Bacteroides	g__Bacteroides	g__Bacteroides	g__Bacteroides	g__Bacteroides	g__Bacteroides	g__Bacteroides	g__Bacteroides	g__Bacteroides	g__Bacteroides	g__Bacteroides	g__Bacteroides	g__Bacteroides
exclude						s__Pseudomonas_tolaasii	s__Pseudomonas_viridiflava	NA	s__Pseudomonas_stutzeri	NA	s__Pseudomonas_psychrotolerans	s__Pseudomonas_otitidis	s__Pseudomonas_litoralis	s__Pseudomonas_caeni	s__Pseudomonas_caeni	NA	NA	NA	NA	NA	NA	NA	NA	NA	NA	NA	NA	NA	NA	s__Bacteroides_plebeius	s__Bacteroides_vulgatus	s__Bacteroides_coprocola	s__Bacteroides_massiliensis	s__Bacteroides_stercoris	s__Bacteroides_fragilis	s__Bacteroides_uniformis	s__Bacteroides_caccae	s__Bacteroides_barnesiae	NA	s__Bacteroides_eggerthii	s__	s__	s__Bacteroides_cellulosilyticus	s__	s__Bacteroides_ovatus	s__Bacteroides_coprophilus	s__Bacteroides_salanitronis	NA	s__Bacteroides_clarus
exclude						Pseudomonas	Pseudomonas	Pseudomonas	Pseudomonas	Pseudomonas	Pseudomonas	Pseudomonas	Pseudomonas	Pseudomonas	Pseudomonas	Pseudomonas	Pseudomonas	Pseudomonas	Pseudomonas	Pseudomonas	Pseudomonas	Pseudomonas	Pseudomonas	Pseudomonas	Pseudomonas	Pseudomonas	Pseudomonas	Pseudomonas	Pseudomonas	Bacteroides	Bacteroides	Bacteroides	Bacteroides	Bacteroides	Bacteroides	Bacteroides	Bacteroides	Bacteroides	Bacteroides	Bacteroides	Bacteroides	Bacteroides	Bacteroides	Bacteroides	Bacteroides	Bacteroides	Bacteroides	Bacteroides	Bacteroides
[truncated: 75 more columns]

## Sheet: OTU_sum_plot
OTU_R	OTU	total_counts	counts	count_beh	genus	species	behaviour	model_count	percentage_model	keep	helper
J_Pseudomonas_OTU_366	OTU_366	314	33	control	Pseudomonas	Pseudomonas psychrotolerans	Linked to aggression				J
K_Pseudomonas_OTU_2442	OTU_2442	192	33	control	Pseudomonas	NA	Linked to started agg				K
A_Bacteroides_OTU_1598	OTU_1598	133	24	control	Bacteroides	Bacteroides salanitronis	Linked to started agg and agg				A
B_Bacteroides_OTU_22324	OTU_22324	1018	335	control	Bacteroides	NA	Linked to aggression				B
E_Prevotella_OTU_377	OTU_377	407	4	control	Prevotella	NA	Link to started aggression				E
E_Prevotella_OTU_667	OTU_667	236	42	control	Prevotella	Prevotella pallens	Link to reacted agg				E
F_Prevotella_OTU_1887	OTU_1887	1055	55	control	Prevotella	Prevotellaceae bacterium	Linked to started agg				F
G_Prevotella_OTU_9014	OTU_9014	245	21	control	Prevotella	NA	Link to reacted agg				G
H_Prevotella_OTU_17264	OTU_17264	265	96	control	Prevotella	NA	Link to reacted agg				H
I_Prevotella_OTU_20448	OTU_20448	1118	408	control	Prevotella	NA	Linked to started agg				I
C_Lactobacillus_OTU_813	OTU_813	233	56	control	Lactobacillus	Lactobacillus mucosae	Linked to started agg				C
D_Lactobacillus_OTU_21141	OTU_21141	374	84	control	Lactobacillus	NA	Linked to peacefulness				D
J_Pseudomonas_OTU_366	OTU_366	314	134	start_agg	Pseudomonas	Pseudomonas psychrotolerans	Linked to aggression			x	J
K_Pseudomonas_OTU_2442	OTU_2442	192	95	start_agg	Pseudomonas	NA	Linked to started agg			x	K
A_Bacteroides_OTU_1598	OTU_1598	133	67	start_agg	Bacteroides	Bacteroides salanitronis	Linked to started agg and agg			x	A
B_Bacteroides_OTU_22324	OTU_22324	1018	131	start_agg	Bacteroides	NA	Linked to aggression			x	B
E_Prevotella_OTU_377	OTU_377	407	333	start_agg	Prevotella	NA	Link to started aggression			x	E
E_Prevotella_OTU_667	OTU_667	236	54	start_agg	Prevotella	Prevotella pallens	Link to reacted agg				E
F_Prevotella_OTU_1887	OTU_1887	1055	754	start_agg	Prevotella	Prevotellaceae bacterium	Linked to started agg			x	F
G_Prevotella_OTU_9014	OTU_9014	245	25	start_agg	Prevotella	NA	Link to reacted agg				G
H_Prevotella_OTU_17264	OTU_17264	265	15	start_agg	Prevotella	NA	Link to reacted agg				H
I_Prevotella_OTU_20448	OTU_20448	1118	395	start_agg	Prevotella	NA	Linked to started agg			x	I
C_Lactobacillus_OTU_813	OTU_813	233	73	start_agg	Lactobacillus	Lactobacillus mucosae	Linked to started agg			x	C
D_Lactobacillus_OTU_21141	OTU_21141	374	87	start_agg	Lactobacillus	NA	Linked to peacefulness			x	D
J_Pseudomonas_OTU_366	OTU_366	314	102	react_agg	Pseudomonas	Pseudomonas psychrotolerans	Linked to aggression			x	J
K_Pseudomonas_OTU_2442	OTU_2442	192	30	react_agg	Pseudomonas	NA	Linked to started agg			x	K
A_Bacteroides_OTU_1598	OTU_1598	133	30	react_agg	Bacteroides	Bacteroides salanitronis	Linked to started agg and agg			x	A
B_Bacteroides_OTU_22324	OTU_22324	1018	278	react_agg	Bacteroides	NA	Linked to aggression			x	B
E_Prevotella_OTU_377	OTU_377	407	19	react_agg	Prevotella	NA	Link to started aggression			x	E
E_Prevotella_OTU_667	OTU_667	236	106	react_agg	Prevotella	Prevotella pallens	Link to reacted agg				E
F_Prevotella_OTU_1887	OTU_1887	1055	106	react_agg	Prevotella	Prevotellaceae bacterium	Linked to started agg			x	F
G_Prevotella_OTU_9014	OTU_9014	245	178	react_agg	Prevotella	NA	Link to reacted agg				G
H_Prevotella_OTU_17264	OTU_17264	265	102	react_agg	Prevotella	NA	Link to reacted agg				H
I_Prevotella_OTU_20448	OTU_20448	1118	127	react_agg	Prevotella	NA	Linked to started agg			x	I
C_Lactobacillus_OTU_813	OTU_813	233	70	react_agg	Lactobacillus	Lactobacillus mucosae	Linked to started agg			x	C
D_Lactobacillus_OTU_21141	OTU_21141	374	78	react_agg	Lactobacillus	NA	Linked to peacefulness			x	D
J_Pseudomonas_OTU_366	OTU_366	314	45	react_pcf	Pseudomonas	Pseudomonas psychrotolerans	Linked to aggression			x	J
K_Pseudomonas_OTU_2442	OTU_2442	192	34	react_pcf	Pseudomonas	NA	Linked to started agg			x	K
A_Bacteroides_OTU_1598	OTU_1598	133	12	react_pcf	Bacteroides	Bacteroides salanitronis	Linked to started agg and agg			x	A
B_Bacteroides_OTU_22324	OTU_22324	1018	274	react_pcf	Bacteroides	NA	Linked to aggression			x	B
E_Prevotella_OTU_377	OTU_377	407	51	react_pcf	Prevotella	NA	Link to started aggression			x	E
E_Prevotella_OTU_667	OTU_667	236	34	react_pcf	Prevotella	Prevotella pallens	Link to reacted agg				E
F_Prevotella_OTU_1887	OTU_1887	1055	140	react_pcf	Prevotella	Prevotellaceae bacterium	Linked to started agg			x	F
G_Prevotella_OTU_9014	OTU_9014	245	21	react_pcf	Prevotella	NA	Link to reacted agg				G
H_Prevotella_OTU_17264	OTU_17264	265	52	react_pcf	Prevotella	NA	Link to reacted agg				H
I_Prevotella_OTU_20448	OTU_20448	1118	188	react_pcf	Prevotella	NA	Linked to started agg			x	I
C_Lactobacillus_OTU_813	OTU_813	233	34	react_pcf	Lactobacillus	Lactobacillus mucosae	Linked to started agg			x	C
D_Lactobacillus_OTU_21141	OTU_21141	374	125	react_pcf	Lactobacillus	NA	Linked to peacefulness			x	D
