# Supplementary material for: The gut microbiome, single nucleotide polymorphisms, and differentially expressed genes promote aggression in an ant
Source: Research Square preprint supplement (doi:10.21203/rs.3.rs-8539228/v1), 2026-01-09
Supplement: Supplementary file 9 [file b893bfcaace2ad48a1013de9.docx]

**Supplementary information for:**

**The gut microbiome, single nucleotide polymorphisms, and differentially expressed genes promote aggression in an ant**

**Authors**

Patrick Krapf*1,2,3, Francesco Cicconardi4, Martin Schilling1, Gerhard P. Aigner1, Thomas Klammsteiner1, Manfred Ayasse5, Wolfgang Arthofer1, Alexander S. Mikheyev6,7, Birgit C. Schlick-Steiner$1, Florian M. Steiner*$1

**Affiliation**

1 Molecular Ecology Group, Department of Ecology, Universität Innsbruck, Innsbruck 6020, Austria

2 Institute for Biodiversity and Ecosystem Dynamics, University of Amsterdam, Amsterdam, 1090 GE, Netherlands

3 Organismal and Evolutionary Biology Research Programme, University of Helsinki, Helsinki, 00560, Finland

4 School of Biological Sciences, University of Bristol, BS8 1TQ, Bristol, UK

5 Institute of Evolutionary Ecology and Conservation Genomics, Ulm University, 89081 Ulm, Germany

6 Ecology and Evolution Unit, Okinawa Institute of Science and Technology Graduate University, Onna, Okinawa, Japan

7 Research School of Biology, Australian National University, Canberra, Australian Capital Territory, Australia

* Patrick Krapf, [p.krapf@uva.nl](mailto:p.krapf@uva.nl), corresponding author

* Florian Steiner, [florian.m.steiner@uibk.ac.at](mailto:florian.m.steiner@uibk.ac.at), corresponding author

$ shared senior authors

**Supplementary Material and Methods**

*Tetramorium alpestre* annotation

To analyse the RNA samples, we created a new annotation using an existing preliminary annotation of *T. alpestre* and the *T. alpestre* assembly. For this, we merged all transcriptome files into a single file, normalised them using “bbnorm” with a target depth of 50 and a minimum depth of 10, and created a new annotation using “STAR”1. Then, we aligned single transcriptomic reads to the new annotation using “STAR”. We calculated counts for differentially expressed genes for each individual using the software “STAR” (command “--quantMode GeneCounts”during the alignment process). For the alignment, we used the reference genome and the new annotation.

**Supplementary Results**

*Recognition assays*

To assess whether workers recognise own against alien colony odour2, we conducted recognition assays using extracted CHCs from each of the nine colonies (NAntsTested=1379). Significantly more workers preferred to reside on their own colony odour (N=502) compared with an alien odour (N=423) or the control with no odour (N=454; multinomial Goodness-of-Fit test assuming the null hypothesis of equal probabilities for each choice; p-value = 0.033).

*Differentially-expressed genes*

In the comparison between ants that *started aggression* and *reacted aggressively*, we found 17,149 DEGs. Of these, 7810 (45.5%) genes were up-regulated and 9339 (54.5%) were down-regulated in ants that *started aggression* (Fig. S4A, volcano plot - blue dots). Of these 7810 and 9339 genes, 13 and 36 genes were significantly up- and down-regulated in workers that *started aggression*, respectively (FDR-corrected for multiple testing; Fig. S4, red dots). When comparing ants that *started aggression* with workers that *reacted peacefully*, we found 16,772 genes. Of these, 7436 (44.3%) genes were up-regulated, and 9936 (55.7%) were down-regulated in workers that *started aggression* (Fig. S4B, volcano plot - blue dots). Of these 7436 and 9936 genes, 28 and 61 genes were significantly up- and down-regulated, respectively. When comparing ants that *reacted aggressively* versus workers that *reacted peacefully*, we found 17,355 genes with a non-zero count, but zero (0.0%) genes were up- or down-regulated in workers that *started aggression* (Fig. S4C).

*Logistic multinomial regression analyses*

Compared with the intercept-only model (Model 1), Models 2-8 significantly explained more variance (Tab. S9). The best model based on the lowest ΔAICc, excluding the intercept-only model, was Model 2 (SNPs only; AICc = 159.92, ΔAICc= 0) followed by Model 4 (SNPs and gene expression; AICc = 164.93, ΔAICc= 5.01; Tab. S10). We calculated a goodness of fit measure for both models by comparing the fit of observed and expected values, and both values displayed a good fit (Model 2: χ2 = 35.28, df = 2, p-value < 0.001, Residual deviance = 141.95; Model 4: χ2 = 44.93, df= 4; p-value < 0.001, Residual deviance = 124.56). For Model 2 (SNPs only model), SNP2 and SNP3 significantly influenced the behavioural states (Tab. S11). The odds ratio that SNP2 was associated with the behavioural states was 31.5 times higher for reacting aggressively and 11.8 times higher for reacting peacefully compared to *started aggression* (z-values for *reacted aggressively*: 3.01; *reacted peacefully*: 2.78; Tab. S11). The odds ratio that SNP3 was associated with the behavioural states was 0.1 times lower for reacting aggressively as well as for reacting peacefully compared to *started aggression* (z-values *reacted aggressively*: -3.44; *reacted peacefully*: -2.85; Tab. S11).

For Model 4 (SNPs and DEGs), SNP2, SNP3, and gene *yellow-d2* significantly influenced the behavioural states (Tab. S12). The odds ratio that SNP2 was associated with the behavioural states was 39.2 times higher for reacting aggressively and 11.8 times higher for reacting peacefully compared to *started aggression* (z-values for *reacted aggressively*: 11.51; *reacted peacefully*: 6.09; Tab. S11). The odds ratio that SNP3 was associated with the behavioural states was 0.1 times lower for reacting aggressively and reacting peacefully compared to *started aggression* (z-values *reacted aggressively*: -7.46; *reacted peacefully*: -4.82; Tab. S11). The odds ratio that gene *yellow-d2* was associated with the behavioural states was 1.0 times higher for reacting aggressively and reacting peacefully compared to *started aggression* (z-values *yellow-d2* *reacted aggressively*: 2.15; *reacted peacefully*: 2.36; Tab. S11). The calculated pseudo-R2 values “Nagelkerke” for Model 2 and Model 4 were 0.41 and 0.89, respectively (Tab. S13, for all models).

In the pairwise comparison of the behavioural states (emmeans analysis), the means did not differ in either Model 2 or 4 (Tab. S14). In Model 2, comparisons between state *started aggression* and both reactions were borderline significant (estimate *started aggression* and *reacted peacefully*: 0.33; df = 8, t-ratio = 2.59, p-value = 0.07; estimate *started aggression* and *reacted peacefully*: 0.35; df = 8, t-ratio = 2.58, p-value = 0.08), but not for *reacted aggressively* vs *reacted peacefully* (estimate: 0.02; df = 8, t-ratio = 0.21, p-value = 0.98). Further, we used log-likelihood ratio tests to assess the significance of independent variables. For both Models 2 and 4, we tested all variables individually by comparing a full model (e.g., ‘SNP1 + SNP2 + SNP3’) and a model that lacked the targeted variable (e.g., ‘SNP1 + SNP2 + SNP3’ with ‘SNP1 + SNP2’; SNP3 is the targeted variable). In testing the variables for Models 2 and 4, all models converged. In Model 2, adding SNP2 and SNP3 individually significantly improved the model fit (Tab. S15). For Model 4, adding SNP2 and SNP3 individually as well as adding the gene *yellow-d2* significantly improved the model fit (Tab. S15).

In Models 9-16, we used only upregulated genes. Compared with the intercept-only model (Model 9), Models 10-16 significantly explained more variance (Tab. S9). Model 10 used the same SNPs as Model 2; its results are identical and shown above (Model 2). Model 10 and Model 12 were the best fitting models (ΔAICc = 0 and = 4.63, respectively; model fit Model 12: χ2 = 43.16, df= 4; p-value < 0.001, Residual deviance = 130.28, AIC = 158.28; Tab. S9). In Model 12, the odds ratio that SNP2 was associated with states *reacted aggressively* and *reacted peacefully* were 32.1 and 11.4 times; and for SNP3 2.2 and 2.1 times fewer, but no gene expression influenced the behavioural states (Tab. S16). The calculated pseudo-R2 value “Nagelkerke” for Model 12 was 0.50 (Tab. S13). For Model 12, the post-hoc tests (“emmeans” package) revealed that the means of behavioural states *started aggression* and *reacted peacefully* were different (Tab. S16), but no other mean comparison was significant. In the log-likelihood ratio tests, all models converged and revealed that in Model 12, adding SNP2 and SNP3 individually significantly improved the model fit as well as adding the gene *CG34367* (Tab. S15).

In Models 17-24, we only used down-regulated genes. Compared with the intercept-only model (Model 17), Models 18-24 significantly explained more variance (Tab. S9). Model 18 used the same SNPs as explanatory variables as Model 2, and the results are shown above. Model 20 and Model 18 were the best fitting models (ΔAICc= 0 and = 1.98, respectively; model fit Model 20: χ2 = 67.13, df= 4; p-value < 0.001, Residual deviance = 96.79, AIC = 140.79). In Model 20, the odds ratio of being associated with *reacted aggressively* and peacefully were 1.6 and 1.6 times higher for SNP1, 54.1 and 31.2 times higher for SNP2, and 0.01 and 0.02 times fewer for SNP3, respectively. Also, several DEGs (i.e., *BicC, CG3238, RFC3*) were associated with the behavioural states (Tab. S17): The odds ratio that gene *BicC* was associated with *reacted aggressively* and peacefully was 1.9 and 1.9 times higher, 1.3 and 0.9 times higher and lower, respectively. For gene *CG3238*, it was 1.1 and 1.2 times higher, and 1.3 and 1.3 times higher for gene *RFC3* (12676), respectively. The calculated pseudo-R2 value “Nagelkerke” for Model 20 was 0.71 (Tab. S13). For Model 20, the calculated post-hoc tests (“emmeans” package) revealed that the means of behavioural states *started aggression* vs *reacted aggressively* and *started aggression* vs *reacted peacefully* were different (Tab. S14), but the mean between reacted aggression vs *reacted peacefully* was not. In the log-likelihood ratio tests, all models converged and revealed that in Model 20, adding SNP2 and SNP3 individually as well as the genes *BicC, Pif1*, and *RFC3* significantly improved the fit of the model (Tab. S15).

*Gene-enrichment analyses with known genes*

Using g:Profiler, we pairwise compared all behavioural states. In the comparison *started aggression* vs *reacted aggressively*, eight and nine up- and down-regulated genes were used, respectively. For up-regulated genes in *started aggression* vs *reacted aggressively*, 26 biological processes and five molecular functions were enriched, which can be summarised into enzyme activities, cellular processes, developmental processes, metabolic processes, cellular structural organisation, and biological regulation. For down-regulated genes, ten biological processes, six molecular functions, and five cellular components that were enriched. These can be broadly summarised into enzyme activities, transporter activities, receptor activities, protein binding, cellular processes, signalling pathways, regulation of cellular processes, cellular localisation and responses, and axon guidance. In the comparison *started aggression* vs *reacted peacefully*, we used 25 and 20 up- and down-regulated genes, respectively. For up-regulated genes, we found six cellular components that were enriched, which can be summarised in cellular structures, components, and extensions. For down-regulated genes, we found 13 molecular functions and three cellular components. These can be summarised in ion-channel activities, enzyme activities, RNA and protein binding, and cellular components. In the comparison *reacted aggressively* vs *reacted peacefully*, no genes were differently expressed, and no gene-enrichment analysis could be conducted.

To check whether the same or different genes were up- and down-regulated genes in the three behavioural states, we created Venn diagrams (<0.05 FDR-corrected genes with known functions were used). In total, 30 up-regulated genes were used: five of those genes (16.6%; *CG3800, CG3902, CDase, Rhp,* and *Moe*; Tab. S5 highlighted in dark yellow) were only found in the comparison *started aggression* vs *reacted aggressively*, 22 genes (73.3%; *CG34367, CG13625, CG3655, apolpp, CG14687, CG3655, Gat, Sur-8, mRpL9, CG9175, CG6656, Phm, Socs16D, Vav, CG3860, CG32225, CG9426, alph, CG16974, CG10483, AP-2alpha,* and *bchs*; Tab. S5 highlighted in light yellow) only in the comparison *started aggression* vs *reacted peacefully*, and three (10.0%; genes *CG3061, svr,* and *Syt4*; Tab. S5 highlighted in yellow and bold) in both comparisons *started aggression* vs *reacted aggressively* and *started aggression* vs *reacted peacefully*. We did not find any genes in the comparison *reacted aggressively* vs *reacted peacefully*. The log2fold change values of these genes ranged between 3.19 and 0.12 for *started aggression* vs *reacted peacefully* and between 0.50 and 0.11 for *started aggression* vs *reacted peacefully* (Tab. S5).

In total, 28 down-regulated genes were used in the Venn diagrams: eight of them (28.6%; *BicC, CG3238, Exo84, PlexA, Tret1-1, Taf5, Doa,* and, *Vps35*; Tab. S5 highlighted in dark blue; Fig. 3B) were in the comparison *started aggression* vs *reacted aggressively*, 19 in the comparison *started aggression* vs *reacted peacefully* (67.9%; *CG3822, Rdl, RFC3, CG10431, Cdep, Dscam1, CG7492, CG6910, snRNP-U1-70K, CG31550, l(1)G0196, CG9346, CG32486, agt, Gcn5, baz, CG13366, U2af50,* and *CG8108*; Tab. S5 highlighted in light blue); and one (3.5%; *yellow-d2*; Tab. S5 highlighted in blue and bold) was found in both comparisons *started aggression* vs *reacted aggressively* and *started aggression* vs *reacted peacefully*. The log2fold changes of these genes ranged between -3.06 and -0.15 for *started aggression* vs *reacted peacefully* and between -1.60 and -0.15 for *started aggression* vs *reacted peacefully* (Tab. S5). Of these genes, two were highly expressed: gene *CG3800* was highly up-regulated (log2fold change = 2.48) and gene *BicC* was highly down-regulated (log2fold change = -3.06). The above-mentioned genes were used for the multinomial regression analyses.

**Supplementary Discussion**

*Six down-regulated genes linked to synaptic functions*

*BicC* encodes an RNA-binding protein that is influencing protein translation during embryonic development (FlyBase). An up-regulation of *BicC* is associated with chronic stress and depression in mice and other animals3-5. In contrast, a down-regulation of *BicC* activates the Wnt pathway6, which is a conserved pathway regulating, among others, cell fate determination and organogenesis during development7. For example, a down-regulation of *BicC* restores normal pleasure-seeking behaviour in depressive rats4 and may affect synaptic plasticity5. We thus speculate that its down-regulation is associated with more active workers. Overall, down-regulating *BicC* might lead to less stress and depression and more aggression in ants.

*Exo84* belongs to the Exocyst complex and is vital for secretion in organisms ranging from yeasts to mammals8. It is enriched in the brain9 and has been predicted to be important in cell signal transduction pathways and the cytoskeleton network8. *Exo84* is vital for multiple developmental processes, such as epithelial polarity and apical protein localisation in *Drosophila*10 and neurite differentiation11. Its down-regulation may cause a reduction in synaptic transmission.

The gene *KaiR1d* is a glutamate receptor and, among others, essential for the calcium sensitivity of baseline [synaptic transmission](https://www.sciencedirect.com/topics/biochemistry-genetics-and-molecular-biology/synaptic-transmission)12. Its down-regulation possibly diminishes the calcium sensitivity and may result in altered neurotransmitter release dynamics and possibly influence the behavioural states of the workers tested.

The gene *Rdl* (*Resistant to dieldrin*) encodes an abundant chloride channel, which is a receptor for gamma-amino butyric acid (GABA) thus mediating GABA inhibitory neurotransmission13. It is, for example, expressed in specific brain structure of *Drosophila* (mushroom bodies) and essential for courtship behaviour in *Drosophila*14 as well as olfactory learning in insects13. Notably, flies with a *Rdl* knock-down have an increased memory acquisition13 and also display higher aggression levels in courtship behaviour14. This down-regulation may thus be one factor explaining why workers *started aggression*.

The gene *yellow-d2* belongs to the highly conserved *yellow*-gene family, which has various functions linked to pigmentiation15. *Yellow* genes, in general, are known to play an essential role in male courtship behaviour in *Drosophila*16 and are assumed to influence nearby cells such as dopamine receptors17 through dopamine receptor downstream signalling. Notably, *Drosophila* males with mutant yellow genes display a reduced courtship behaviour16. This may indicate that down-regulation of *yellow-d2* could possibly impact aggressive behaviour.

The gene *PlexA* is a conserved functional receptor for semaphorins, for example, in *Drosophila*18, and crickets19. Semaphorins are membrane proteins of the nervous system18 binding to plexins. Most effects of down-regulated *PlexA* in adult organisms are unknown but may result in an increase of excitatory synapses and in the frequency of synaptic signals20 potentially contributing to quicker reaction.

Further, we found two up-regulated genes associated with DNA repair and replication. One gene is *Pif1*, which is part of DNA helicases, which are evolutionarily conserved among prokaryotes and eukaryotes21. DNA helicases are important for DNA recombination, repair, replication, transcription, and translation22. The other gene is *RFC3*, which encodes the Replication Factor C Subunit 3, which is part of the *RFC* (Replication Factor Ccomplex). It is essential for DNA replication23 and associated with human cancer development24.

**SUPPLEMENTARY FIGURES**


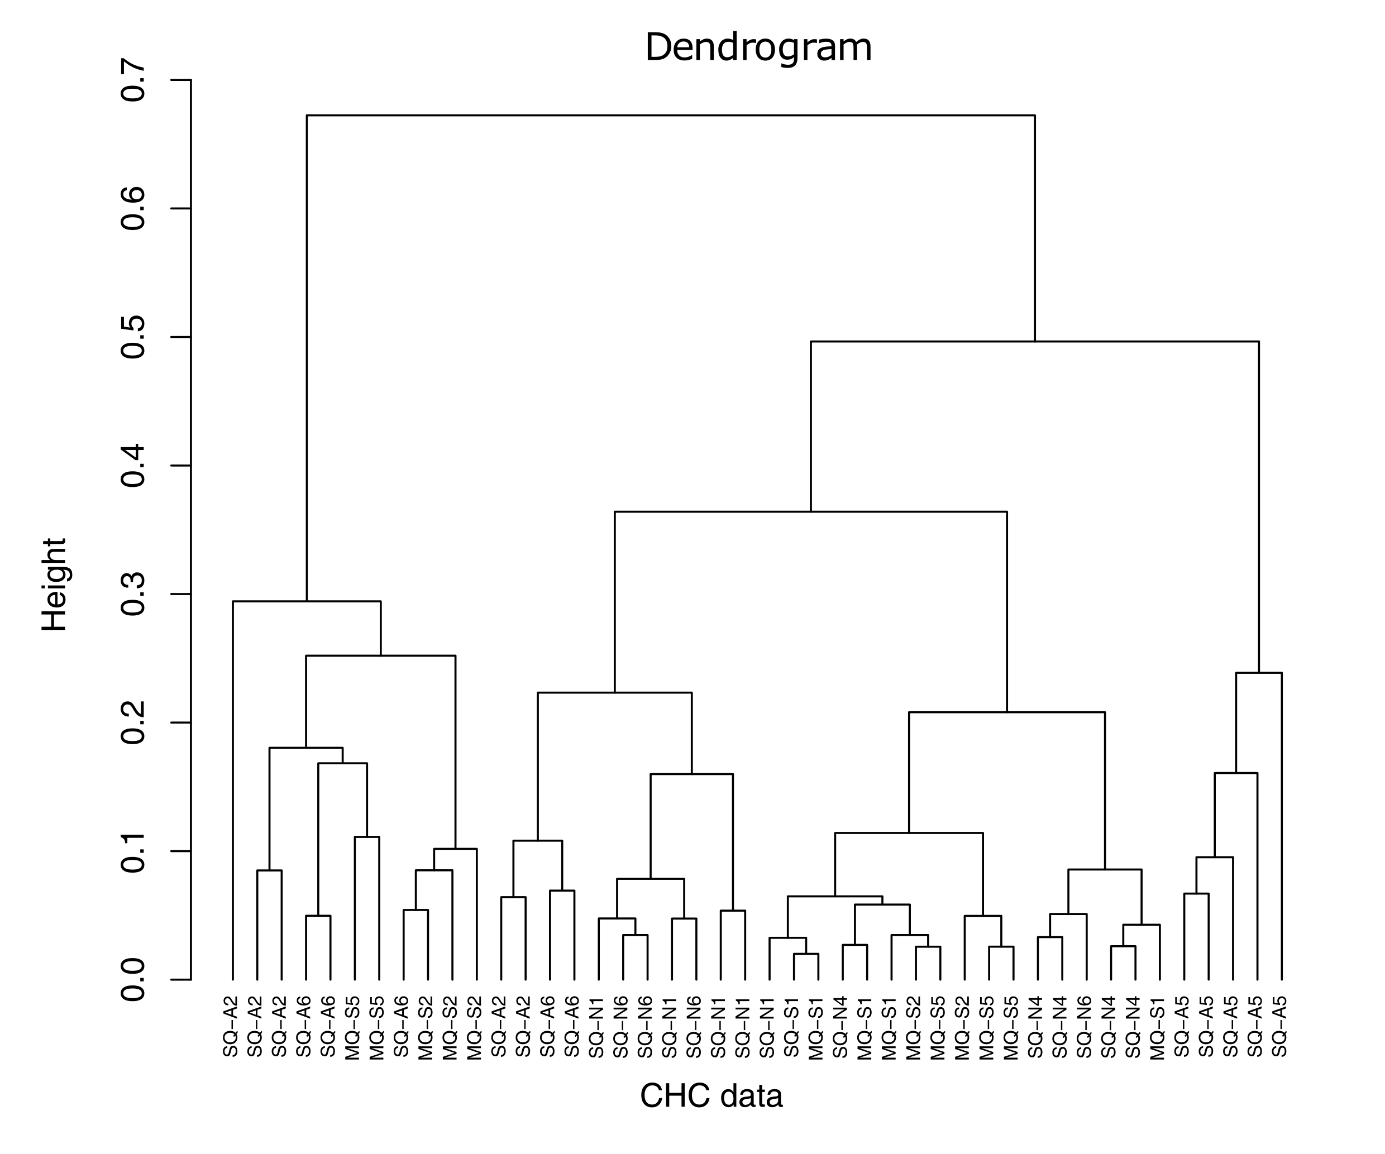


**Figure S1.** **Hierarchical cluster analysis using CHC data from each colony.** Samples from SQ-N and SQ-S had similar CHC profiles and partially clustered together (Nworkers=44). Samples from SQ-A5 were more similar to SQ-N and MQ-N colonies than to SQ-A2 and SQ-A6. The latter two clustered closely to MQ-N2 and MQ-N5 as well as SQ-N1 and SQ-N6. Note: SQ-A = single-queened and aggressive, SQ-N = single-queened and non-aggressive, MQ-N = multiple-queened and non-aggressive.


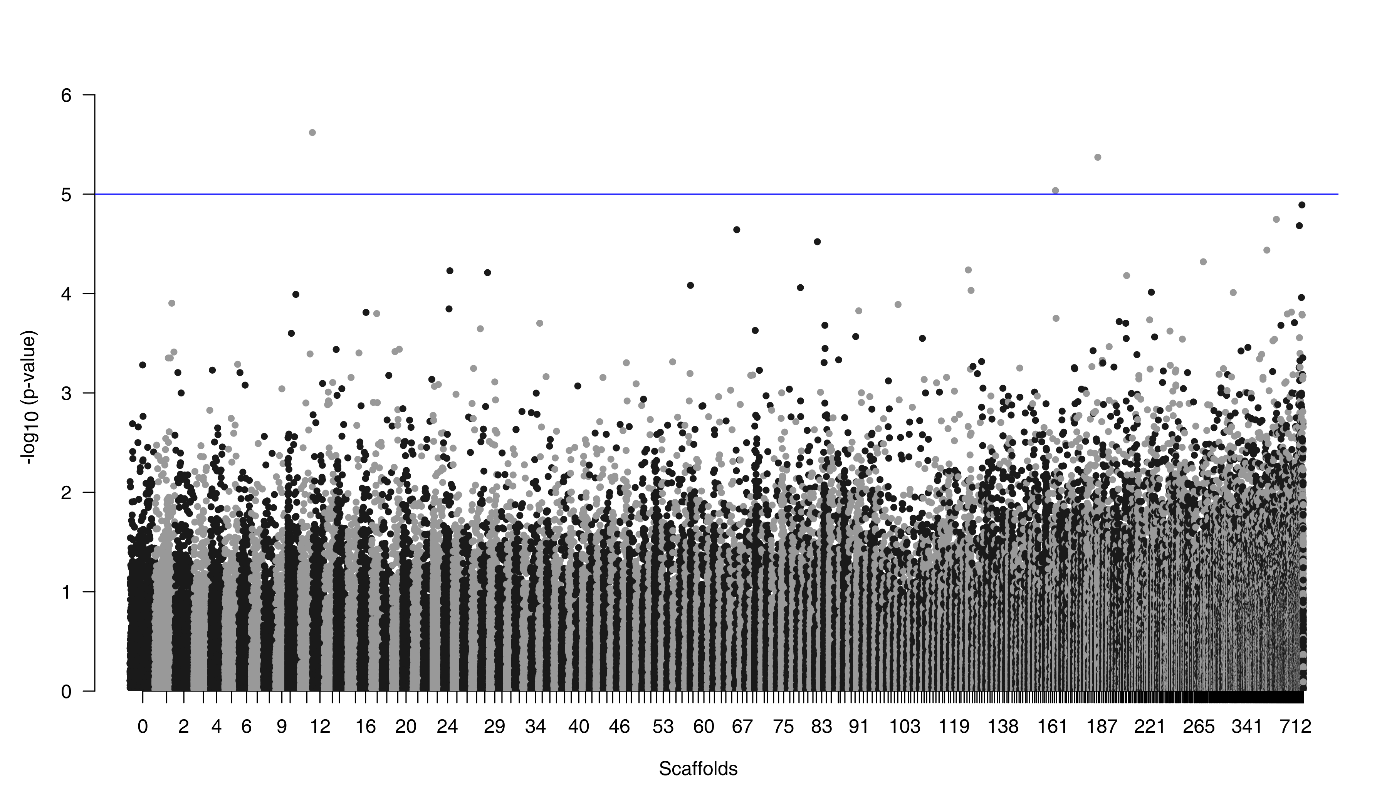


**Figure S2.** **Manhattan plot of all scaffolds.** The blue line represents the suggestive line, and three SNPs are above the suggestive line, namely SNP1 at scaffold 11 - site 2457277, SNP2 at scaffold 165 - site 28302, and SNP3 at scaffold 185 - site 110741, site in gene *gastrulation-defective*.


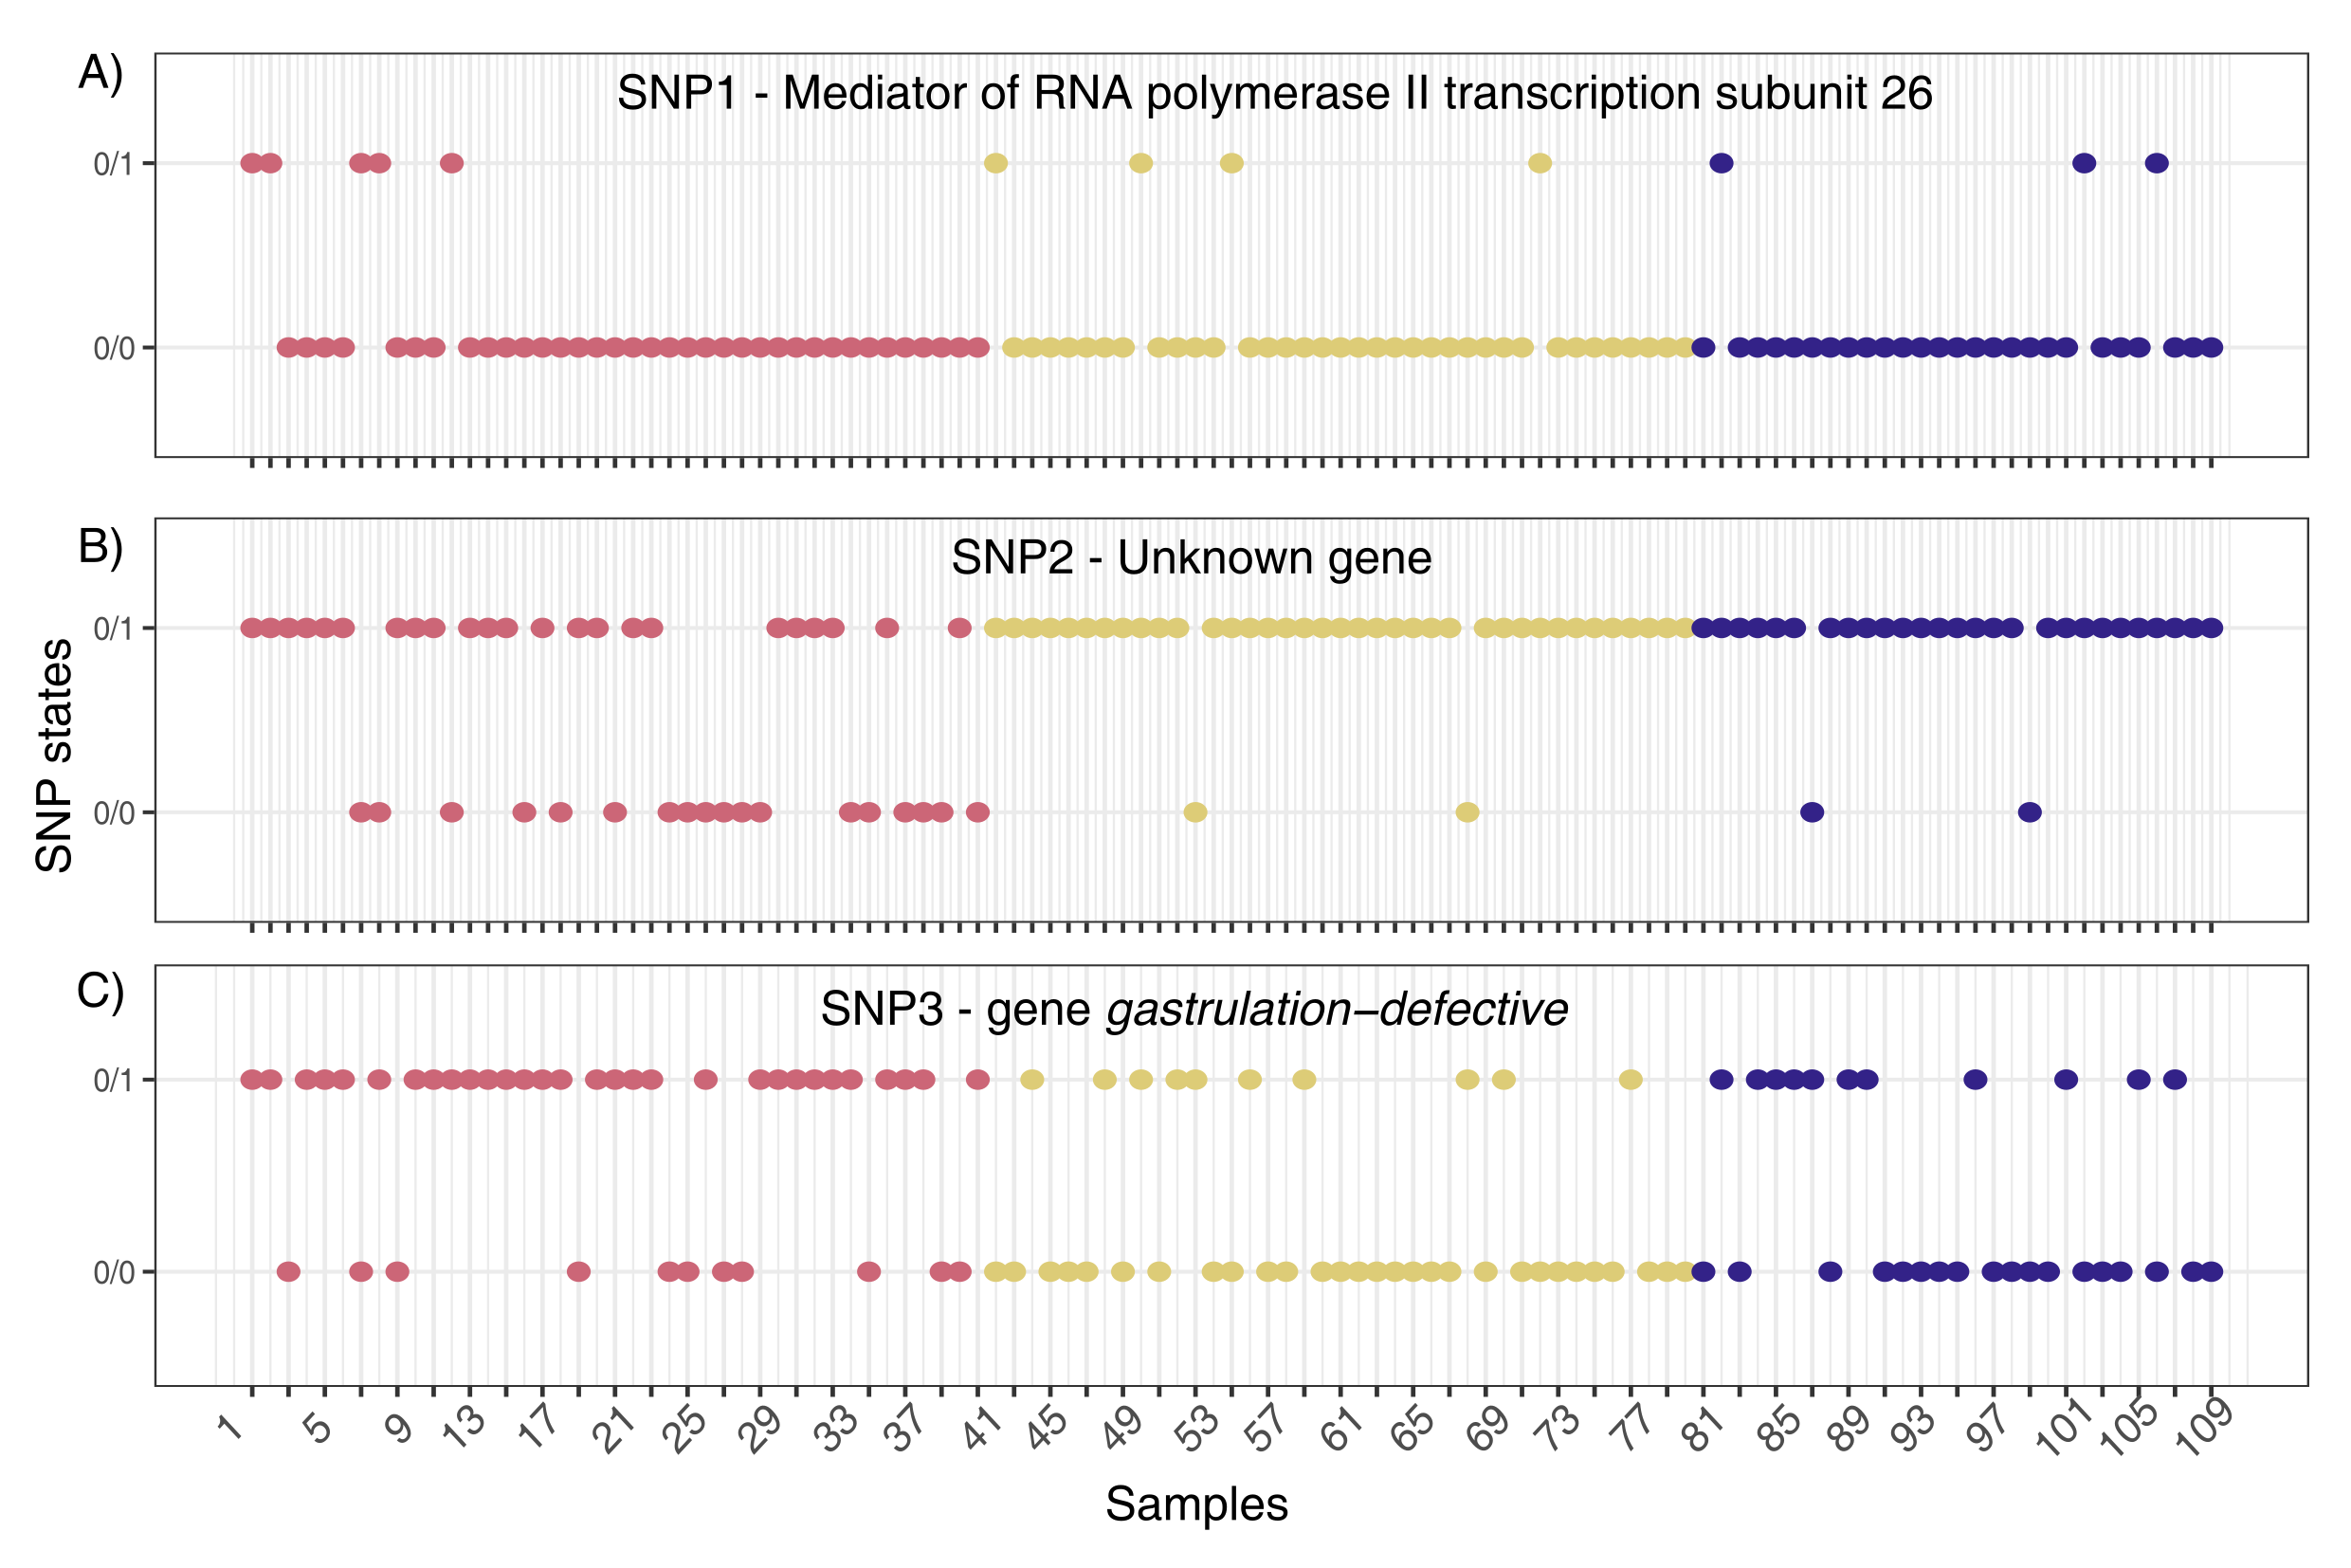


**Figure S3. Allelic SNPs states of each worker represented for each of the three SNPs.** The samples from 1 to 109 representing all workers, the numeric combinations “0/0” represents homozygous alleles or “0/1” heterozygous alleles). A) The first panel represent the gene “Mediator of RNA polymerase II transcription subunit 26”. Here, 36 out of 41 (88%) workers that *started aggression*, 35 out of 39 workers (90%) that *reacted aggressively*, and 26 out of 29 (90%) workers that *reacted peacefully* were homozygous for the reference allele. This indicates that this gene is not a strong candidate for the behavioural states. B) The second panel represents an unknown gene. Here, 18 out of 41 (43%) workers that *started aggression* were homozygous in the SNP state, while 2 out of 39 (5%) workers that *reacted aggressively* and 2 out of 29 (7%) workers that *reacted peacefully* were homozygous in the SNP state, respectively. Although this is a currently unknown, this gene could be a driver for the behavioural states observed. C) The third panel represents the gene *gastrulation-defective* (*gd*). Here, 30 out of 41 (73%) workers that *started aggression* were heterozygous for the SNP state, while 10 out of 39 (26%) workers that *reacted aggressively* and 11 out of 29 (38%) workers that *reacted peacefully* were heterozygous for the behavioural state. This suggests that heterozygosity in the gene *gd* could positively influence the start of aggressive behaviour in workers.


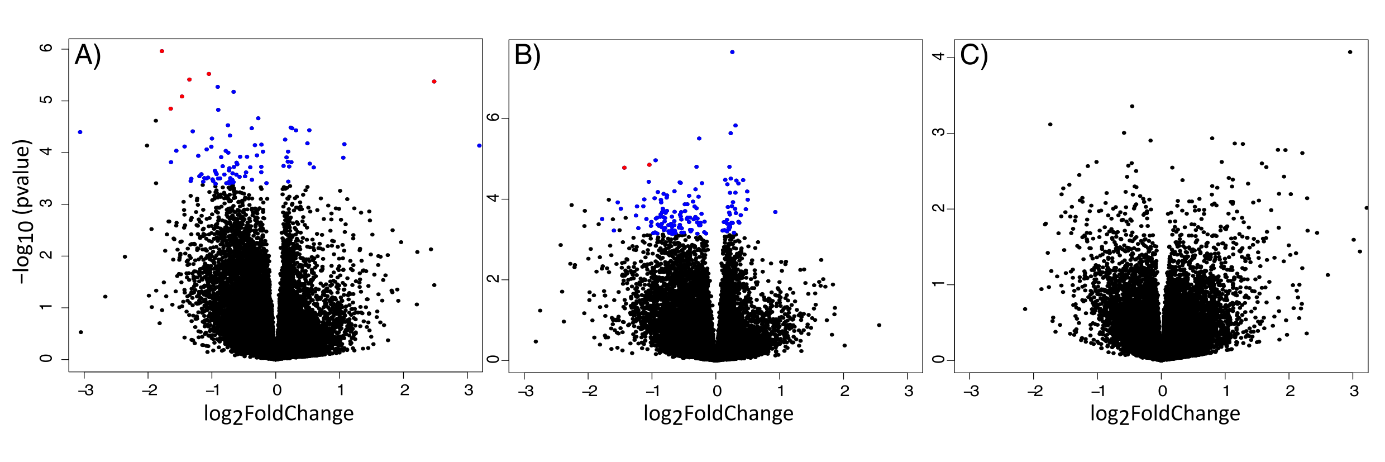


**Figure S4.** **Gene expression volcano plots from 82 workers for the three behavioural states.** Differentially expressed genes **A)** between behavioural states *started aggression* vs *reacted aggressively* are displayed, **B)** between *started aggression* vs *reacted peacefully*, and **C)** between *reacted aggressively* vs *reacted peacefully*. Red dots represent statistically significant (corrected for multiple testing using FDR with <0.05) genes with a log2fold change smaller than -1 or larger than 1, while blue dots represent statistically significant genes (not corrected for multiple testing). In total, 136 (1%) up-regulated and 437 (2.5) downregulated genes were discovered in the comparison *started aggression* vs *reacted aggressively* (total, 17153 genes) and 146 up-regulated and 324 downregulated genes in *started aggression* vs *reacted peacefully* (total, 16776 genes). However, no genes were differentially expressed in the comparison *reacted aggressively* vs *reacted peacefully*. Of these DEGs, 761 out of 1043 (73%) genes were downregulated in *started aggression* vs *reacted aggressively* and *started aggression* vs *reacted peacefully*, while 282 out of 1043 (27%) genes were upregulated.


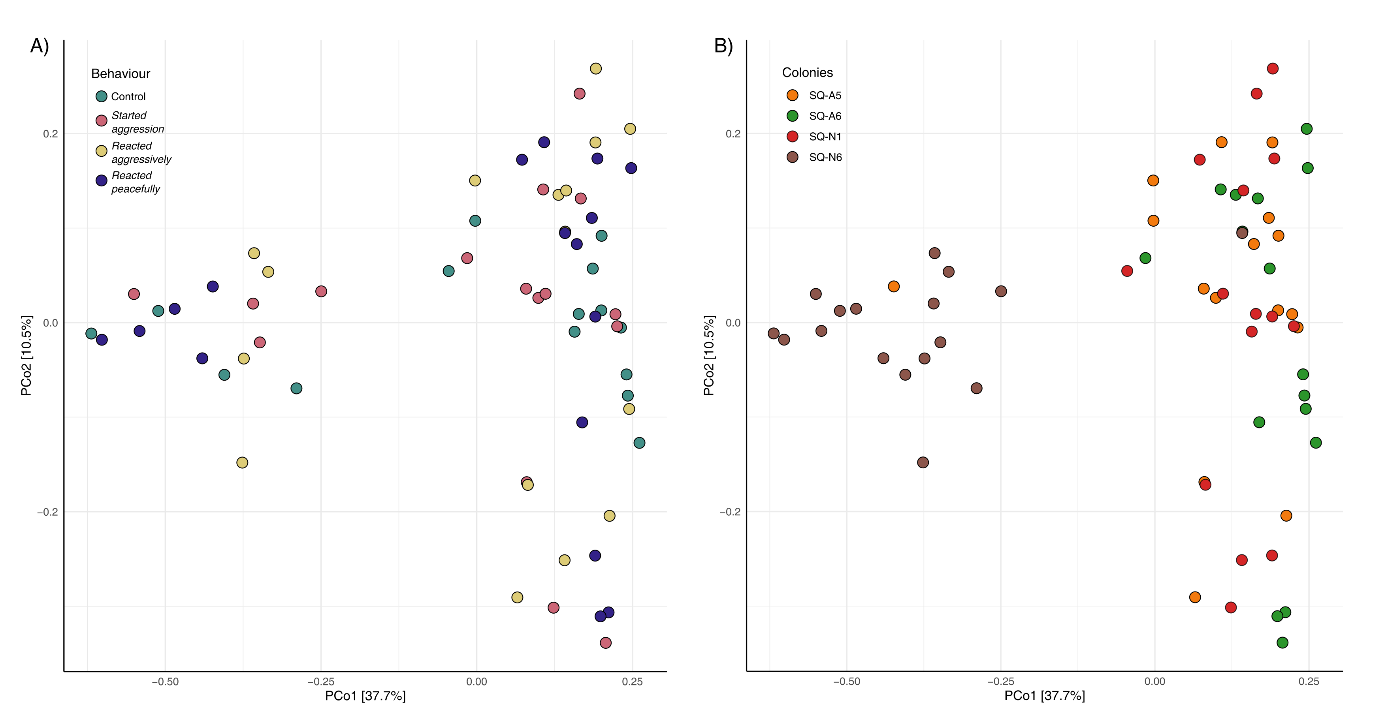


**Figure S5. Principal Coordinate Analysis (PCoA) of the microbiome data.** In **A)**, all samples including the control samples are displayed (Nsamples=65). There was no apparent clustering across the directly frozen control samples (i.e., workers frozen in the field) and the other samples (i.e., workers frozen after laboratory maintenance and aggression assays). In **B)**, the same samples are displayed as in **A)** but coloured based on their colony origin. Here, the samples cluster based on their microbiome, with SQ-N6 clustering on the left side of the x-axis and all other samples clustering together. Note: SQ-A = single-queened and aggressive, SQ-N = single-queened and non-aggressive.

**SUPPLEMENTARY TABLES**

**Table S1. The countries, locations, colony IDs, GPS coordinates, selected behavioural states, and the number of workers used for genomic and transcriptomic analyses.**

| **Country, location** | **Population abbreviation** | **Colony ID** | **GPS coordinates (Latitude, Longitude)** | ***Started aggression*** | ***Reacted aggressively*** | ***Reacted peacefully*** | **Number of workers** | **Total number of workers used for WGS and expression analyses** |
| --- | --- | --- | --- | --- | --- | --- | --- | --- |
| Italy, Penser Joch | SQ-A | SQ-A2 | 46.81403, 11.44196 | 2 | 1 | 2 | 5 | 31 |
| SQ-A5 | 46.81440, 11.44244 | 6 [4] | 3 [4] | 1 [4] | 10 [12] |
| SQ-A6 | 46.81483, 11.44271 | 2 [4] | 9 [4] | 5 [4] | 16 [12] |
| Austria, Kuehtai | SQ-N | SQ-N1 | 47.21915, 11.07514 | 1 [4] | 5 [4] | 4 [4] | 10 [12] | 28 |
| SQ-N4 | 47.21926, 11.07610 | 6 | 3 | 1 | 10 |
| SQ-N6 | 47.21920, 11.07661 | 3 [4] | 3 [4] | 2 [5] | 8 [13] |
| Austria, Mussen | MQ-N (additional workers) | MQ-S1 | 46.7071, 12.92747 | 5 (5) | 2 (3) | 3 (1) | 10 (9) | 26 (24) |
| MQ-S2 | 46.70754, 12.92800 | 2 (5) | 2 (2) | 4 (1) | 8 (8) |
| MQ-S5 | 46.7098, 12.92262 | 2 (2) | 4 (1) | 2 (4) | 8 (7) |
|  | Total number of workers (incl. additional workers from MQ-N) |  |  | 31 (12) | 29 (6) | 25 (6) |  | 85 (109) |

Note: (Numbers in brackets) represent additional samples used for WGS; [Numbers in squared brackets] represent samples used for microbiome analyses. SQ-A = single-queened and aggressive, SQ-N = single-queened and non-aggressive, MQ-N = multiple-queened and non-aggressive

**Table S2. CHC compounds for each colony**

| **Population →** | **SQ-A** | | | **SQ-N** | | | **MQ-N** | | |
| --- | --- | --- | --- | --- | --- | --- | --- | --- | --- |
| **Colony →** | **SQ-A2** | **SQ-A5** | **SQ-A6** | **SQ-N1** | **SQ-N4** | **SQ-N6** | **MQ-N1** | **MQ-N2** | **MQ-N5** |
| **CHC compound ↓** |  |  |  |  |  |  |  |  |  |
| Dodecane | 0.00940 | 0.00777 | 0.00871 | 0.00776 | 0.00744 | 0.00839 | 0.00746 | 0.00832 | 0.00751 |
| Tridecene* | 0.00251 | 0.00102 | 0.00189 | 0.00062 | 0.00041 | 0.00065 | 0.00072 | 0.00148 | 0.00167 |
| Tridecane | 0.01188 | 0.00925 | 0.00871 | 0.00880 | 0.00965 | 0.00976 | 0.01484 | 0.01040 | 0.00945 |
| Tetradecene* | 0.00436 | 0.00143 | 0.00303 | 0.00104 | 0.00113 | 0.00164 | 0.00112 | 0.00201 | 0.00268 |
| Tetradecane | 0.01103 | 0.00830 | 0.00879 | 0.00665 | 0.00661 | 0.00728 | 0.00688 | 0.00723 | 0.00755 |
| Pentadecene1* | 0.02174 | 0.00865 | 0.00975 | 0.00214 | 0.00418 | 0.00898 | 0.00249 | 0.00439 | 0.00511 |
| Pentadecene2* | 0.00746 | 0.00548 | 0.00437 | 0.00120 | 0.00157 | 0.00300 | 0.00105 | 0.00130 | 0.00177 |
| Pentadecene3* | 0.00244 | 0.00169 | 0.00200 | 0.00150 | 0.00217 | 0.00305 | 0.00157 | 0.00110 | 0.00173 |
| Pentadecene4* | 0.00785 | 0.00199 | 0.00403 | 0.00112 | 0.00101 | 0.00227 | 0.00136 | 0.00298 | 0.00351 |
| Pentadecane | 0.07663 | 0.05245 | 0.01739 | 0.00766 | 0.02050 | 0.02342 | 0.00834 | 0.01254 | 0.01121 |
| Hexadecane | 0.01308 | 0.00438 | 0.00910 | 0.00390 | 0.00352 | 0.00540 | 0.00447 | 0.00568 | 0.00716 |
| Tetradecanal | 0.00397 | 0.00107 | 0.00304 | 0.00055 | 0.00071 | 0.00087 | 0.00040 | 0.00260 | 0.00236 |
| Heptadecene1* | 0.03839 | 0.01464 | 0.01919 | 0.00384 | 0.01061 | 0.01170 | 0.00446 | 0.00846 | 0.00662 |
| Heptadecene2* | 0.00451 | 0.00271 | 0.00579 | 0.00206 | 0.00516 | 0.00508 | 0.00255 | 0.00107 | 0.00221 |
| Heptadecene3* | 0.00695 | 0.00153 | 0.00582 | 0.00065 | 0.00059 | 0.00148 | 0.00119 | 0.00313 | 0.00382 |
| Heptadecene4* | 0.00331 | 0.00347 | 0.00481 | 0.00557 | 0.00258 | 0.00565 | 0.00242 | 0.00303 | 0.00231 |
| Heptadecane | 0.01347 | 0.00727 | 0.01444 | 0.00464 | 0.00660 | 0.00744 | 0.00559 | 0.00539 | 0.00818 |
| Unknown | 0.00380 | 0.00120 | 0.00432 | 0.00150 | 0.00147 | 0.00204 | 0.00212 | 0.00253 | 0.00284 |
| Octadecane | 0.02126 | 0.00402 | 0.01849 | 0.00391 | 0.00312 | 0.00579 | 0.00520 | 0.00775 | 0.01062 |
| Hexadecanal | 0.02890 | 0.00243 | 0.00980 | 0.00075 | 0.00087 | 0.00272 | 0.00106 | 0.00930 | 0.00916 |
| Unknown | 0.00223 | 0.00158 | 0.00208 | 0.00181 | 0.00145 | 0.00145 | 0.00181 | 0.00166 | 0.00191 |
| Unknown | 0.00817 | 0.00106 | 0.00468 | 0.00068 | 0.00150 | 0.00077 | 0.00111 | 0.00117 | 0.00386 |
| Heptadecanal | 0.00506 | 0.00386 | 0.00418 | 0.00445 | 0.00406 | 0.00391 | 0.00362 | 0.00418 | 0.00436 |
| Eicosane | 0.01937 | 0.00203 | 0.01341 | 0.00203 | 0.00158 | 0.00274 | 0.00238 | 0.00632 | 0.00860 |
| Octadecanal | 0.02268 | 0.00193 | 0.01491 | 0.00068 | 0.00046 | 0.00177 | 0.00095 | 0.00901 | 0.01026 |
| Heneicosane | 0.00585 | 0.00453 | 0.00407 | 0.00324 | 0.00250 | 0.00300 | 0.00368 | 0.00318 | 0.00417 |
| Docosane | 0.00740 | 0.00847 | 0.00552 | 0.00473 | 0.00265 | 0.00345 | 0.00453 | 0.00372 | 0.00495 |
| Z-9-Tricosene | 0.04163 | 0.00980 | 0.02413 | 0.00648 | 0.00271 | 0.00712 | 0.00425 | 0.01436 | 0.02199 |
| Z-7-Tricosene | 0.01966 | 0.01232 | 0.01301 | 0.00773 | 0.00297 | 0.00669 | 0.00516 | 0.00876 | 0.01480 |
| Tricosane | 0.12803 | 0.21006 | 0.11244 | 0.09078 | 0.03925 | 0.07168 | 0.06459 | 0.06015 | 0.08622 |
| 11-Methyltricosane | 0.01105 | 0.00514 | 0.00629 | 0.02042 | 0.00819 | 0.01382 | 0.00312 | 0.00383 | 0.00477 |
| 3-Methyltricosane | 0.12983 | 0.06860 | 0.10582 | 0.06173 | 0.02811 | 0.04804 | 0.03417 | 0.06900 | 0.05430 |
| Tetracosane | 0.01867 | 0.02390 | 0.01766 | 0.01738 | 0.00981 | 0.01445 | 0.01217 | 0.01375 | 0.01550 |
| Pentacosene* | 0.00208 | 0.00214 | 0.00366 | 0.00073 | 0.00082 | 0.00084 | 0.00254 | 0.00259 | 0.00377 |
| Pentacosene* | 0.00624 | 0.00311 | 0.00725 | 0.00289 | 0.00158 | 0.00303 | 0.00210 | 0.00439 | 0.00345 |
| Z-11-Pentacosene | 0.00413 | 0.00099 | 0.00372 | 0.00166 | 0.00040 | 0.00131 | 0.00071 | 0.00092 | 0.00252 |
| Z-9-Pentacosene | 0.13014 | 0.07775 | 0.13584 | 0.03712 | 0.01744 | 0.03760 | 0.02567 | 0.09895 | 0.12322 |
| Pentacosene* | 0.04894 | 0.03929 | 0.05422 | 0.03390 | 0.01505 | 0.03339 | 0.01945 | 0.04571 | 0.04144 |
| Pentacosane | 0.15546 | 0.24542 | 0.17864 | 0.21834 | 0.12158 | 0.17864 | 0.13924 | 0.14155 | 0.17347 |
| 13-Metylpentacosane | 0.03780 | 0.01397 | 0.01946 | 0.08155 | 0.04394 | 0.07681 | 0.02426 | 0.03575 | 0.03306 |
| 3-Methylpentacosane | 0.01838 | 0.01289 | 0.01860 | 0.00843 | 0.00740 | 0.01153 | 0.00901 | 0.02069 | 0.01202 |
| Hexacosane | 0.01029 | 0.01507 | 0.01300 | 0.01191 | 0.01073 | 0.01233 | 0.00897 | 0.01157 | 0.01019 |
| Z-11Heptacosene | 0.00369 | 0.00145 | 0.00361 | 0.00197 | 0.00141 | 0.00197 | 0.00029 | 0.00076 | 0.00268 |
| -Z9-Heptacosene | 0.01286 | 0.00720 | 0.01370 | 0.00441 | 0.00271 | 0.00553 | 0.00362 | 0.01475 | 0.00943 |
| Z-7-Heptacosene | 0.01123 | 0.00570 | 0.01140 | 0.00263 | 0.00185 | 0.00338 | 0.00380 | 0.00994 | 0.00483 |
| Heptacosene* | 0.00285 | 0.00313 | 0.00231 | 0.00128 | 0.00027 | 0.00130 | 0.00063 | 0.00120 | 0.00205 |
| Heptacosane | 0.04008 | 0.06140 | 0.04377 | 0.04625 | 0.03695 | 0.05459 | 0.03757 | 0.03869 | 0.03708 |
| 13-Methylheptacosane | 0.00886 | 0.00562 | 0.00618 | 0.01682 | 0.01304 | 0.01899 | 0.00522 | 0.00949 | 0.00617 |
| Unknown | 0.00792 | 0.01089 | 0.00819 | 0.00461 | 0.00603 | 0.00861 | 0.00956 | 0.01337 | 0.00935 |
| Octacosane | 0.00670 | 0.00894 | 0.01024 | 0.00672 | 0.00758 | 0.00623 | 0.00500 | 0.00728 | 0.00612 |
| Unknown | 0.00327 | 0.00281 | 0.00254 | 0.00202 | 0.00213 | 0.00264 | 0.00237 | 0.00425 | 0.00276 |
| Nonacosen* | 0.00782 | 0.00546 | 0.00563 | 0.00602 | 0.00468 | 0.00766 | 0.00608 | 0.01110 | 0.00492 |
| Nonacosene* | 0.00639 | 0.00510 | 0.00839 | 0.00829 | 0.00688 | 0.00909 | 0.00996 | 0.01055 | 0.00608 |
| Nonacosene* | 0.00442 | 0.00401 | 0.00406 | 0.00492 | 0.00419 | 0.00674 | 0.00383 | 0.00822 | 0.00467 |
| Z-11-Nonacosene | 0.00416 | 0.00230 | 0.00362 | 0.00382 | 0.00412 | 0.00397 | 0.00294 | 0.00585 | 0.00286 |
| Z-7-Nonacosene | 0.00127 | 0.00126 | 0.00702 | 0.00126 | 0.00103 | 0.00156 | 0.00145 | 0.00384 | 0.00144 |
| Nonacosene* | 0.01139 | 0.00943 | 0.01172 | 0.01144 | 0.00961 | 0.01498 | 0.00954 | 0.02172 | 0.01003 |
| Nonacosane | 0.01334 | 0.01647 | 0.00464 | 0.01162 | 0.01117 | 0.01494 | 0.00893 | 0.00955 | 0.00831 |
| Triacontane | 0.00567 | 0.00664 | 0.00689 | 0.00591 | 0.00673 | 0.00549 | 0.00400 | 0.00574 | 0.00570 |
| Hentriaconane | 0.00700 | 0.00714 | 0.00744 | 0.00453 | 0.00524 | 0.00616 | 0.00267 | 0.00452 | 0.00448 |
| Dotriaconane | 0.00363 | 0.00405 | 0.00356 | 0.00213 | 0.00309 | 0.00262 | 0.00147 | 0.00346 | 0.00256 |
| Tritriacontane | 0.00804 | 0.00616 | 0.00826 | 0.00231 | 0.00288 | 0.00498 | 0.00294 | 0.00399 | 0.00507 |
| Pentatriacontane | 0.00656 | 0.00203 | 0.00933 | 0.00042 | 0.00099 | 0.00279 | 0.00130 | 0.00212 | 0.00339 |

Arrows indicate the direction to read the table. The asterisk (*) represents unknown double bond position; SQ-A = single-queened and aggressive, SQ-N = single-queened and non-aggressive, MQ-N = multiple-queened and non-aggressive colonies.

**Table S3. Mean within-colony relatedness and number of queens calculated based on microsatellite genotyping**

| **Population (N)** | **Colony** | **Queller and Goodnight25 relatedness based on microsatellite data** | **Number of queens (Pamilo 1991)26 based on microsatellite data** | **Manichaikul et al. 201027 relatedness based on whole-genome data** | **Number of queens (Pamilo 1991)26 based on whole-genome data** |
| --- | --- | --- | --- | --- | --- |
| SQ-A (N = 31) | SQ-A2 | 0.725 | 1.05 | 0.58 | 1.38 |
| SQ-A5 | 0.693 | 1.11 | 0.58 | 1.39 |
| SQ-A6 | 0.727 | 1.04 | 0.57 | 1.43 |
| SQ-N (N= 28) | SQ-N1 | 0.768 | 0.97 | 0.63 | 1.25 |
| SQ-N4 | 0.797 | 0.92 | 0.63 | 1.25 |
| SQ-N6 | 0.771 | 0.96 | 0.62 | 1.27 |
| MQ-N (N = 50) | MQ-N1 | 0.456 | 1.86 | 0.32 | 2.79 |
| MQ-N2 | 0.385 | 2.26 | 0.33 | 2.73 |
| MQ-N 5 | 0.361 | 2.44 | 0.33 | 2.66 |

N = number of samples. Relatedness was calculated using 12 workers per colony and whole-genome sequencing data using 109 individuals, in total). The equation to calculate the number of queens is: (3-r)/(3r). SQ-A = single-queened and aggressive, SQ-N = single-queened and non-aggressive, MQ-N = multiple-queened and non-aggressive

**Table S4. Count data of the SNP alleles that were homozygous and heterozygous for the reference genome**

| **SNP** | **Reference or alternative allele** | ***Started aggression*** | ***Reacted aggressively*** | ***Reacted peacefully*** | **p-value pairwise comparisons “*Started aggression* vs *reacted aggressively*”** | **p-value pairwise comparisons “*Started aggression* vs *reacted* *peacefully*”** | **p-value pairwise comparisons “R*eacted aggressively* vs *reacted* *peacefully”*** | **Cramér's V effect size** |
| --- | --- | --- | --- | --- | --- | --- | --- | --- |
| SNP1 | Reference | 36 | 35 | 26 | 1.00 | 1.00 | 1.00 | 0.03 |
| Alternative | 5 | 4 | 3 |  |  |  |
| SNP2 | Reference | 18 | 2 | 2 | <0.001 | 0.002 | 1.00 | 0.46 |
| Alternative | 23 | 37 | 27 |  |  |  |
| SNP3 | Reference | 11 | 29 | 18 | <0.001 | 0.013 | 0.304 | 0.42 |
| Alternative | 30 | 10 | 11 |  |  |  |  |

Similar as depicted above but represented are the exact counts of individuals with reference or alternative alleles. SNP2 is more frequently present in individuals that reacted rather than *started aggression* and SNP3 is more frequently present in individuals that either *started aggression* or *reacted aggressively*. Note: SNP1 = predicted mediator of RNA polymerase; SNP2 = unknown gene; SNP3 = *gastrulation-defective* (*gd*).

**Table S5. Known genes with log2fold change, p-value, corrected p-value and FlyBase name**

| **Behavioural comparison** | **Direction of expression** | **Gene name** | **log2fold change** | **p-value** | **corrected p-value** | **FB name** |
| --- | --- | --- | --- | --- | --- | --- |
| *started aggression* vs *reacted aggressively* | Down-regulated | *BicC* | -3.06 | <0.001 | 0.025 | FBgn0000182 |
| Talp_g7179_NC | -1.78 | <0.001 | 0.012 |  |
| LOC103317067 | -1.64 | <0.001 | 0.018 |  |
| LOC103317335 | -1.35 | <0.001 | 0.012 |  |
| Talp_g7164_NC | -1.33 | <0.001 | 0.049 |  |
| LOC103315917 | -1.32 | <0.001 | 0.048 |  |
| LOC103317561 | -1.21 | <0.001 | 0.034 |  |
| OG_9850 | -1.20 | <0.001 | 0.048 |  |
| *CG3238* | -1.14 | <0.001 | 0.049 | FBgn0031540 |
| LOC107965784 | -1.09 | <0.001 | 0.048 |  |
| Talp_g13383_NC | -1.06 | <0.001 | 0.048 |  |
| *Exo84* | -1.05 | <0.001 | 0.012 | FBgn0266668 |
| Talp_g6294_NC | -1.00 | <0.001 | 0.030 |  |
| LOC103318185 | -0.95 | <0.001 | 0.044 |  |
| Talp_g5810_NC | -0.94 | <0.001 | 0.046 |  |
| LOC100679608 | -0.91 | <0.001 | 0.012 |  |
| OG_9651 | -0.80 | <0.001 | 0.046 |  |
| ***yellow-d2*** | -0.77 | <0.001 | 0.050 | FBgn0034856 |
| Talp_g17849_NC | -0.75 | <0.001 | 0.025 |  |
| Talp_g1029_NC | -0.74 | <0.001 | 0.033 |  |
| Talp_g9848_NC | -0.73 | <0.001 | 0.050 |  |
| Talp_g7566_NC | -0.72 | <0.001 | 0.027 |  |
| *PlexA* | -0.67 | <0.001 | 0.050 | FBgn0025741 |
| LOC103316878 | -0.66 | <0.001 | 0.049 |  |
| Talp_g9256_NC | -0.66 | <0.001 | 0.012 |  |
| LOC103316795 | -0.66 | <0.001 | 0.040 |  |
| LOC103317038 | -0.57 | <0.001 | 0.048 |  |
| Talp_g10943_NC | -0.56 | <0.001 | 0.034 |  |
| Talp_g3303_NC | -0.48 | <0.001 | 0.048 |  |
| LOC100679823 | -0.46 | <0.001 | 0.046 |  |
| Talp_g18001_NC | -0.40 | <0.001 | 0.040 |  |
| LOC100678188 | -0.37 | <0.001 | 0.048 |  |
| *Tret1*-1 | -0.23 | <0.001 | 0.040 | FBgn0050035 |
| *Taf5* | -0.22 | <0.001 | 0.031 | FBgn0010356 |
| *Doa* | -0.20 | <0.001 | 0.032 | FBgn0265998 |
| *Vps35* | -0.15 | <0.001 | 0.050 | FBgn0034708 |
| Up-regulated | LOC103316462 | 3.19 | <0.001 | 0.031 |  |
| ***CG3800*** | 2.48 | <0.001 | 0.012 | FBgn0034802 |
| Talp_g13981_NC | 1.06 | <0.001 | 0.034 |  |
| LOC725530 | 0.53 | <0.001 | 0.040 |  |
| *CG3902* | 0.53 | <0.001 | 0.025 | FBgn0036824 |
| *CDase* | 0.50 | <0.001 | 0.031 | FBgn0039774 |
| *CG3061* | 0.24 | <0.001 | 0.039 | FBgn0038195 |
| *Rhp* | 0.24 | <0.001 | 0.025 | FBgn0026374 |
| Talp_g9220_NC | 0.21 | <0.001 | 0.040 |  |
| ***svr*** | 0.20 | <0.001 | 0.049 | FBgn0004648 |
| ***Syt4*** | 0.19 | <0.001 | 0.032 | FBgn0028400 |
| *OG_9394* | 0.15 | <0.001 | 0.030 |  |
| *Moe* | 0.12 | <0.001 | 0.040 | FBgn0011661 |
| *started aggression* vs *reacted peacefully* | Down-regulated | OG_10401 | -1.60 | <0.001 | 0.046 |  |
| Talp_g16099_NC | -1.54 | <0.001 | 0.033 |  |
| Talp_g5657_NC | -1.49 | <0.001 | 0.036 |  |
| Talp_g10747 | -1.43 | <0.001 | 0.019 |  |
| LOC103317009 | -1.09 | <0.001 | 0.039 |  |
| Talp_g7566_NC | -1.05 | <0.001 | 0.023 |  |
| LOC100679608 | -1.04 | <0.001 | 0.019 |  |
| OG_10936 | -1.01 | <0.001 | 0.041 |  |
| Talp_g9334_NC | -0.98 | 0.001 | 0.049 |  |
| LOC103316075 | -0.96 | <0.001 | 0.031 |  |
| Talp_g16636_NC | -0.95 | 0.001 | 0.049 |  |
| *CG3822* | -0.91 | <0.001 | 0.041 | FBgn0038837 |
| Talp_g3647_NC | -0.85 | <0.001 | 0.041 |  |
| LOC103316557 | -0.84 | <0.001 | 0.038 |  |
| Talp_g1029_NC | -0.82 | <0.001 | 0.039 |  |
| Talp_g5431_NC | -0.82 | <0.001 | 0.029 |  |
| Talp_g15519_NC | -0.80 | <0.001 | 0.041 |  |
| Talp_g8926_NC | -0.79 | 0.001 | 0.044 |  |
| Talp_g7967_NC | -0.79 | <0.001 | 0.038 |  |
| LOC103316878 | -0.77 | <0.001 | 0.031 |  |
| Talp_g567_NC | -0.77 | <0.001 | 0.038 |  |
| ***yellow-d2*** | -0.73 | 0.001 | 0.049 | FBgn0034856 |
| Talp_g11362_NC | -0.72 | 0.001 | 0.048 |  |
| OG_9452 | -0.69 | 0.001 | 0.046 |  |
| Talp_g17254 | -0.68 | <0.001 | 0.043 |  |
| Talp_g6489_NC | -0.67 | <0.001 | 0.041 |  |
| Talp_g14339 | -0.65 | <0.001 | 0.041 |  |
| OG_11146 | -0.65 | <0.001 | 0.038 |  |
| Talp_g14342_NC | -0.63 | 0.001 | 0.049 |  |
| Talp_g6301_NC | -0.56 | <0.001 | 0.023 |  |
| Talp_g3525_NC | -0.56 | <0.001 | 0.039 |  |
| Talp_g9256_NC | -0.55 | <0.001 | 0.023 |  |
| LOC103316795 | -0.55 | <0.001 | 0.039 |  |
| *Rdl* | -0.54 | 0.001 | 0.049 | FBgn0004244 |
| Talp_g9909 | -0.53 | 0.001 | 0.044 |  |
| *RFC3* | -0.50 | 0.001 | 0.049 | FBgn0032244 |
| Talp_g12472_NC | -0.49 | <0.001 | 0.034 |  |
| *CG10431* | -0.45 | <0.001 | 0.039 | FBgn0032730 |
| LOC100679823 | -0.45 | <0.001 | 0.034 |  |
| LOC100114798 | -0.44 | <0.001 | 0.039 |  |
| *Cdep* | -0.43 | <0.001 | 0.039 | FBgn0265082 |
| LOC103317696 | -0.42 | <0.001 | 0.041 |  |
| LOC100123547 | -0.42 | <0.001 | 0.030 |  |
| *Dscam1* | -0.41 | <0.001 | 0.039 | FBgn0033159 |
| *CG7492* | -0.40 | 0.001 | 0.046 | FBgn0035807 |
| *CG6910* | -0.36 | <0.001 | 0.033 | FBgn0036262 |
| *snRNP-U1-70K* | -0.35 | <0.001 | 0.040 | FBgn0016978 |
| *CG31550* | -0.32 | <0.001 | 0.039 | FBgn0051550 |
| *l(1)G0196* | -0.30 | <0.001 | 0.019 | FBgn0027279 |
| *CG9346* | -0.29 | <0.001 | 0.041 | FBgn0034572 |
| *CG32486* | -0.29 | 0.001 | 0.049 | FBgn0266918 |
| *agt* | -0.29 | <0.001 | 0.039 | FBgn0024912 |
| *Gcn5* | -0.27 | <0.001 | 0.031 | FBgn0020388 |
| Talp_g1444_NC | -0.26 | <0.001 | 0.041 |  |
| LOC727647 | -0.26 | <0.001 | 0.041 |  |
| *baz* | -0.26 | <0.001 | 0.008 | FBgn0000163 |
| *CG13366* | -0.24 | <0.001 | 0.041 | FBgn0025633 |
| Talp_g9262_NC | -0.24 | <0.001 | 0.041 |  |
| *U2af50* | -0.22 | <0.001 | 0.039 | FBgn0005411 |
| LOC100119138 | -0.18 | 0.001 | 0.049 |  |
| *CG8108* | -0.15 | 0.001 | 0.049 | FBgn0027567 |
| Up-regulated | ***CG34367*** | 0.50 | <0.001 | 0.031 | FBgn0085396 |
| Talp_g3549_NC | 0.49 | <0.001 | 0.029 |  |
| *CG13625* | 0.43 | <0.001 | 0.023 | FBgn0039210 |
| *CG3655* | 0.39 | <0.001 | 0.039 | FBgn0040397 |
| *apolpp* | 0.37 | <0.001 | 0.041 | FBgn0087002 |
| *CG14687* | 0.36 | <0.001 | 0.041 | FBgn0037835 |
| *CG3655* | 0.32 | <0.001 | 0.023 | FBgn0040397 |
| *Gat* | 0.28 | 0.001 | 0.049 | FBgn0039915 |
| *Sur-8* | 0.27 | <0.001 | 0.033 | FBgn0038504 |
| Talp_g17779_NC | 0.26 | <0.001 | 0.041 |  |
| *mRpL9* | 0.25 | <0.001 | 0.035 | FBgn0038319 |
| *CG9175* | 0.25 | <0.001 | 0.041 | FBgn0031779 |
| ***svr*** | 0.23 | <0.001 | 0.008 | FBgn0004648 |
| *CG3061* | 0.22 | <0.001 | 0.029 | FBgn0038195 |
| *CG6656* | 0.22 | <0.001 | 0.044 | FBgn0038912 |
| *Phm* | 0.22 | <0.001 | 0.041 | FBgn0283509 |
| *Socs16D* | 0.21 | <0.001 | 0.019 | FBgn0030869 |
| *Vav* | 0.21 | 0.001 | 0.046 | FBgn0040068 |
| *CG3860* | 0.19 | <0.001 | 0.036 | FBgn0034951 |
| ***Syt4*** | 0.18 | <0.001 | 0.023 | FBgn0028400 |
| LOC552402 | 0.18 | <0.001 | 0.041 |  |
| *CG32225* | 0.18 | 0.001 | 0.047 | FBgn0052225 |
| *CG9426* | 0.16 | <0.001 | 0.041 | FBgn0032485 |
| *alph* | 0.15 | <0.001 | 0.023 | FBgn0086361 |
| *CG16974* | 0.14 | 0.001 | 0.046 | FBgn0032479 |
| *CG10483* | 0.13 | 0.001 | 0.046 | FBgn0035649 |
| *AP-2alpha* | 0.13 | <0.001 | 0.041 | FBgn0264855 |
| *bchs* | 0.11 | 0.001 | 0.046 | FBgn0043362 |

FB = Flybase. Highlighted cells represent genes with known function (i.e. annotated genes). Cells highlighted in dark yellow represent up-regulated genes in the comparison *started aggression* vs *reacted aggressively*, cells highlighted in light yellow in the comparison *started aggression* vs *reacted peacefully,* cells highlighted in yellow and bold in both comparisons. Cells highlighted in dark blue represent down-regulated genes in the comparison *started aggression* vs *reacted aggressively*, highlighted in light blue represent down-regulated genes in the comparison *started aggression* vs *reacted peacefully*, highlighted in blue and bold represent down-regulated genes in both comparisons *started aggression* vs *reacted aggressively* and *started aggression* vs *reacted peacefully*. Unknown gene names are left blank.

**Table S6. Rarefied OTU counts for the control and each behavioural state, and their frequency**

| **Genus or order** | **Sum control** | **Sum *started aggression*** | **Sum *reacted aggressively*** | **Sum *reacted peacefully*** | **Sum without control** | **Frequency [%]** |
| --- | --- | --- | --- | --- | --- | --- |
| *Acetobacter* | 627 | 886 | 844 | 894 | 2624 | 0.7% |
| *Bacteroides* | 21002 | 25814 | 24398 | 23800 | 74012 | 20.7% |
| *Enterococcus* | 1853 | 4264 | 29832 | 6454 | 40550 | 11.3% |
| *Fusobacterium* | 937 | 654 | 331 | 678 | 1663 | 0.5% |
| *Lactobacillus* | 14481 | 22715 | 20986 | 22923 | 66624 | 18.6% |
| *Megamonas* | 2826 | 6570 | 6841 | 5806 | 19217 | 5.4% |
| *Prevotella* | 7791 | 18659 | 23139 | 19154 | 60952 | 17.0% |
| *Pseudomonas* | 45271 | 23942 | 35009 | 31914 | 90865 | 25.4% |
| Rhizobiales | 282 | 342 | 348 | 325 | 1015 | 0.3% |
| **Total** | 95070 | 103846 | 141728 | 111948 | 357522 | 100% |

OTUs of nine different genera or order are presented above which have been associated with behaviour in various studies (see main text). The frequency of each genus or order is presented as a percentage of the total counts of these OTUs

**Table S7. Counts of the behavioural state presented for the nine selected OTUs**

| **Genus** | **Species OTU** | **Counts total** | **Count control** | **Count *Started aggression*** | **Count *Reacted aggressively*** | **Count *Reacted peacefully*** |
| --- | --- | --- | --- | --- | --- | --- |
| *Bacteroides* | *B. salanitronis* OTU 1598 | 133 | 24 | 67 | 30 | 12 |
| *Bacteroides* sp. OTU 22324 | 1018 | 335 | 131 | 278 | 274 |
| *Lactobacillus* | *L. mucosae* OTU 813 | 233 | 56 | 73 | 70 | 34 |
| *Lactobacillus* sp. OTU 21141 | 374 | 84 | 87 | 78 | 125 |
| *Prevotella* | *Prevotella* sp. OTU 377 | 407 | 4 | 333 | 19 | 51 |
| *Prevotella bacterium* OTU 1887 | 1055 | 55 | 754 | 106 | 140 |
| *Prevotella* sp. OTU 20448 | 1118 | 408 | 395 | 127 | 188 |
| *Pseudomonas* | *P. psychrotolerans* OTU 366 | 314 | 33 | 134 | 102 | 45 |
| *Pseudomonas* sp. OTU 2442 | 192 | 33 | 95 | 30 | 34 |

Based on the multinomial logistic regressions, nine OTUs were associated with the behavioural states. Their counts are presented above.

**Table S8. Behavioural states comparisons for each OTU count**

| **Genus** | **Species OTU** | **Comparison** | **Log estimate** | **SE** | **Z-Ratio** | **p-value** |
| --- | --- | --- | --- | --- | --- | --- |
| *Bacteroides* | *Bacteroides* sp. OTU 1598 | ***started aggression* vs *reacted aggressively*** | **0.80** | **0.22** | **3.66** | **<0.001** |
| ***started aggression* vs *reacted peacefully*** | **1.72** | **0.31** | **5.49** | **<0.001** |
| ***reacted aggressively* vs *reacted peacefully*** | **0.92** | **0.34** | **2.68** | **0.020** |
| *Bacteroides* sp. OTU 22324 | ***started aggression* vs *reacted aggressively*** | **-0.75** | **0.11** | **-7.10** | **<0.001** |
| ***started aggression* vs *reacted peacefully*** | **-0.74** | **0.11** | **-6.95** | **<0.001** |
| *reacted aggressively* vs *reacted peacefully* | 0.01 | 0.09 | 0.17 | 0.984 |
| *Lactobacillus* | *Lactobacillus mucosae* OTU 813 | *started aggression* vs *reacted aggressively* | 0.04 | 0.17 | 0.25 | 0.966 |
| ***started aggression* vs *reacted peacefully*** | **0.76** | **0.21** | **3.68** | **<0.001** |
| ***reacted aggressively* vs *reacted peacefully*** | **0.72** | **0.21** | **3.45** | **0.002** |
| *Lactobacillus* sp. OTU 21141 | *started aggression* vs *reacted aggressively* | 0.11 | 0.16 | 0.70 | 0.763 |
| ***started aggression* vs *reacted peacefully*** | **-0.36** | **0.14** | **-2.60** | **0.026** |
| ***reacted aggressively* vs *reacted peacefully*** | **-0.47** | **0.14** | **-3.27** | **0.003** |
| *Prevotella* | *Prevotella* sp. OTU 377 | ***started aggression* vs *reacted aggressively*** | **2.86** | **0.24** | **12.14** | **<0.001** |
| ***started aggression* vs *reacted peacefully*** | **1.88** | **0.15** | **12.48** | **<0.001** |
| ***reacted aggressively* vs *reacted peacefully*** | **-0.99** | **0.27** | **-3.67** | **<0.001** |
| Prevotella sp. - OTU 1887 | ***started aggression* vs *reacted aggressively*** | **2.86** | **0.24** | **12.14** | **<0.001** |
| ***started aggression* vs *reacted peacefully*** | **1.88** | **0.15** | **12.48** | **<0.001** |
| ***reacted aggressively* vs *reacted peacefully*** | **-0.99** | **0.27** | **-3.67** | **<0.001** |
| *Prevotella* sp. OTU 20448 | ***started aggression* vs *reacted aggressively*** | **1.13** | **0.10** | **11.12** | **<0.001** |
| ***started aggression* vs *reacted peacefully*** | **0.74** | **0.09** | **8.38** | **<0.001** |
| ***reacted aggressively* vs *reacted peacefully*** | **-0.39** | **0.11** | **-3.42** | **0.002** |
| *Pseudomonas* | *Pseudomonas psychrotolerans* OTU 366 | ***started aggression* vs *reacted aggressively*** | **0.27** | **0.13** | **2.08** | **0.095** |
| ***started aggression* vs *reacted peacefully*** | **1.09** | **0.17** | **6.33** | **<0.001** |
| ***reacted aggressively* vs *reacted peacefully*** | **0.82** | **0.18** | **4.57** | **<0.001** |
| *Pseudomonas* sp. OTU 2442 | ***started aggression* vs *reacted aggressively*** | **1.15** | **0.21** | **5.50** | **<0.001** |
| ***started aggression* vs *reacted peacefully*** | **1.03** | **0.20** | **5.14** | **<0.001** |
| *reacted aggressively* vs *reacted peacefully* | -0.13 | 0.25 | -0.50 | 0.871 |

Based on the multinomial logistic regressions, nine OTUs were associated with the behavioural states. We compared their counts in a generalised linear model and pairwise comparison with correction for multiple testing (see Main text for details). SE = standard error. Significant comparisons are shown in bold font.

**Table S9. Intercept-only model vs all other models used in the multinomial logistic regression**

| **Model used** | **Model comparison** | **Residual df** | **Residual deviance** | **df** | **LR statistics** | **p-value** |
| --- | --- | --- | --- | --- | --- | --- |
| 1-8 |  | 162 | 178.96 |  |  |  |
| **1 vs 2** | **156** | **141.95** | **6** | **37.01** | **<0.001** |
| 2 vs 3 | 154 | 157.93 | 2 | -15.98 | 1.00 |
| 3 vs 4 | 150 | 170.52 | 4 | -12.59 | 1.00 |
| **4 vs 5** | **148** | **124.56** | **2** | **45.96** | **<0.001** |
| 5 vs 6 | 144 | 133.22 | 4 | -8.66 | 1.00 |
| 6 vs 7 | 142 | 140.24 | 2 | -7.02 | 1.00 |
| **7 vs 8** | **136** | **111.61** | **6** | **28.63** | **<0.001** |
| 9-16 |  | 162 | 178.96 |  |  |  |
| **9 vs 10** | **156** | **178.96** | **6** | **37.01** | **<0.001** |
| 10 vs 11 | 156 | 141.95 | 0 | -24.86 | 1.00 |
| **11 vs 12** | **150** | **166.81** | **6** | **36.53** | **<0.001** |
| 12 vs 13 | 150 | 130.28 | 0 | -40.24 | 1.00 |
| **13 vs 14** | **144** | **170.52** | **6** | **37.30** | **<0.001** |
| 14 vs 15 | 144 | 133.22 | 0 | -22.21 | 1.00 |
| **15 vs 16** | **138** | **120.24** | **6** | **35.20** | **<0.001** |
| 17-24 |  | 162 | 178.96 |  |  |  |
| **17 vs 18** | **156** | **141.95** | **6** | **37.01** | **<0.001** |
| 18 vs 19 | 154 | 157.93 | 2 | -15.98 | 1.00 |
| 19 vs 20 | 150 | 170.52 | 4 | -12.59 | 1.00 |
| **20 vs 21** | **148** | **124.56** | **2** | **45.96** | **<0.001** |
| 21 vs 22 | 144 | 133.22 | 4 | -8.66 | 1.00 |
| 22 vs 23 | 142 | 140.24 | 2 | -7.02 | 1.00 |
| **23 vs 24** | **136** | **111.61** | **6** | **28.62** | **<0.001** |

df = degrees of freedom; LR statistics = likelihood ratio statistics. Bold columns represent statistically significant models. Model names have been altered because the order was changed in the analyses depending on the number of variables.

Model 1: Intercept only

Model 2: SNP1+SNP2 + SNP3

Model 3: Genes *CG3061* + *svr* + *Syt4* + *yellow-d2*

Model 4: Within-colony relatedness + TAS + PC1 CHC PCA + soil nitrogen values + mean annual precipitation + precipitation of the warmest quarter + mean annual temperature + maximum temperature of the warmest month

Model 5: SNP1+SNP2 + SNP3 + genes *CG3061* + *svr* + *Syt4* + *yellow-d2*

Model 6: SNP1+SNP2 + SNP3 + within-colony relatedness + TAS + PC1 CHC PCA + soil nitrogen values + mean annual precipitation + precipitation of the warmest quarter + mean annual temperature + maximum temperature of the warmest month

Model 7: Genes *CG3061* + *svr* + *Syt4* + *yellow-d2* + within-colony relatedness + TAS + PC1 CHC PCA + soil nitrogen values + mean annual precipitation + precipitation of the warmest quarter + mean annual temperature + maximum temperature of the warmest month

Model 8: SNP1+SNP2 + SNP3 + genes *CG3061* + *svr* + *Syt4* + *yellow-d2* + within-colony relatedness + TAS + PC1 CHC PCA + soil nitrogen values + mean annual precipitation + precipitation of the warmest quarter + mean annual temperature + maximum temperature of the warmest month

Model 9: Intercept only

Model 10: SNP1+SNP2 + SNP3

Model 11: Genes *CG3800* + *CG3902* + *CG34367*

Model 12: SNP1+SNP2 + SNP3 + genes CG3800 + CG3902 + CG34367

Model 13: Within-colony relatedness + TAS + PC1 CHC PCA + soil nitrogen values + mean annual precipitation + precipitation of the warmest quarter + mean annual temperature + maximum temperature of the warmest month

Model 14: SNP1+SNP2 + SNP3 + within-colony relatedness + TAS + PC1 CHC PCA + soil nitrogen values + mean annual precipitation + precipitation of the warmest quarter + mean annual temperature + maximum temperature of the warmest month

Model 15: Genes *CG3800* + *CG3902* + *CG34367*+ within-colony relatedness + TAS + PC1 CHC PCA + soil nitrogen values + mean annual precipitation + precipitation of the warmest quarter + mean annual temperature + maximum temperature of the warmest month

Model 16: SNP1+SNP2 + SNP3 + genes *CG3800* + *CG3902* + *CG34367*+ within-colony relatedness + TAS + PC1 CHC PCA + soil nitrogen values + mean annual precipitation + precipitation of the warmest quarter + mean annual temperature + maximum temperature of the warmest month

Model 17: Intercept only

Model 18: SNP1+SNP2 + SNP3

Model 19: *BicC* + *CG3238* + *Exo84* + *PlexA* + *CG3822* + *Rdl* + *RFC3*

Model 20: SNP1+SNP2 + SNP3 + *BicC* + *CG3238* + *Exo84* + *PlexA* + *CG3822* + *Rdl* + *RFC3*

Model 21: Within-colony relatedness + TAS + PC1 CHC PCA + soil nitrogen values + mean annual precipitation + precipitation of the warmest quarter + mean annual temperature + maximum temperature of the warmest month

Model 22: SNP1+SNP2 + SNP3 + within-colony relatedness + TAS + PC1 CHC PCA + soil nitrogen values + mean annual precipitation + precipitation of the warmest quarter + mean annual temperature + maximum temperature of the warmest month

Model 23: *BicC* + *CG3238* + *Exo84* + *PlexA* + *CG3822* + *Rdl* + *RFC3* + within-colony relatedness + TAS + PC1 CHC PCA + soil nitrogen values + mean annual precipitation + precipitation of the warmest quarter + mean annual temperature + maximum temperature of the warmest month

Model 24: SNP1+SNP2 + SNP3 + *BicC* + *CG3238* + *Exo84* + *PlexA* + *CG3822* + *Rdl* + *RFC3* + within-colony relatedness + TAS + PC1 CHC PCA + soil nitrogen values + mean annual precipitation + precipitation of the warmest quarter + mean annual temperature + maximum temperature of the warmest month

**Table S10. AICc comparison for multinomial logistic regression Models 2-8, 10-16, and 18-24**

| **Comparison** | **Models** | **K** | **AICc** | **ΔAICc** | **AICc Weight** | **Cumulative Weight** | **Log likelihood** |
| --- | --- | --- | --- | --- | --- | --- | --- |
| Models 2-8 | Model 2 | 8 | 159.92 | 0 | 0.92 | 0.92 | -70.97 |
| Model 4 | 16 | 164.93 | 5.01 | 0.08 | 1 | -62.28 |
| Model 3 | 10 | 181.02 | 21.1 | 0 | 1 | -78.96 |
| Model 6 | 20 | 187.05 | 27.13 | 0 | 1 | -66.64 |
| Model 8 | 28 | 198.26 | 38.34 | 0 | 1 | -55.81 |
| Model 7 | 22 | 201.19 | 41.27 | 0 | 1 | -70.02 |
| Model 5 | 14 | 204.32 | 44.4 | 0 | 1 | -85 |
| Models 10-16 | Model 10 | 8 | 159.92 | 0 | 0.91 | 0.91 | -70.97 |
| Model 12 | 14 | 164.55 | 4.63 | 0.09 | 1 | -65.14 |
| Model 11 | 8 | 184.78 | 24.86 | 0 | 1 | -83.4 |
| Model 14 | 20 | 186.99 | 27.07 | 0 | 1 | -66.61 |
| Model 16 | 26 | 197.76 | 37.84 | 0 | 1 | -60.12 |
| Model 13 | 14 | 204.79 | 44.86 | 0 | 1 | -85.26 |
| Model 15 | 20 | 209.2 | 49.28 | 0 | 1 | -77.72 |
| Models 18-24 | Model 20 | 22 | 157.95 | 0 | 0.73 | 0.73 | -48.4 |
| Model 18 | 8 | 159.92 | 1.98 | 0.27 | 1 | -70.97 |
| Model 19 | 16 | 174.06 | 16.11 | 0 | 1 | -66.84 |
| Model 22 | 20 | 186.99 | 29.05 | 0 | 1 | -66.61 |
| Model 23 | 28 | 201.58 | 43.64 | 0 | 1 | -57.47 |
| Model 24 | 34 | 204.67 | 46.73 | 0 | 1 | -43.02 |
| Model 21 | 14 | 204.79 | 46.84 | 0 | 1 | -85.26 |

K=number of parameters used in the model; Models highlighted in grey represent the two best models based on Akaike Information Criterion for small sample sizes (AICc) and ΔAICc. Note that Models 1, 9, and 17 are not presented as they are the intercept-only models.

**Table S11. Results of multinomial logistic regression Model 2 compared with the baseline *started aggression***

| **Behaviour** | **SNPs** | **Estimate** | **logn odds ratio** | **SE** | **Z-statistics** | **p-value** | **Lower CI** | **Upper CI** | **Log-likelihood LRT** | **df LRT** | **χ2 value LRT** | **p-value LRT** | **significance LRT** |
| --- | --- | --- | --- | --- | --- | --- | --- | --- | --- | --- | --- | --- | --- |
| *Reacted aggressively* | Intercept | -3.11 | 0.05 | 2.59 | -1.20 | 0.231 |  |  |  |  |  |  |  |
| SNP1 | 0.24 | 1.27 | 1.10 | 0.22 | 0.830 | 0.15 | 10.90 | -71.02 | 2 | 0.081 | 0.960 |  |
| **SNP2** | **3.45** | **31.54** | **1.15** | **3.01** | **0.003** | **3.33** | **299.00** | **-80.44** | **2** | **18.93** | **<0.001** | ******* |
| **SNP3** | **-2.46** | **0.09** | **0.71** | **-3.44** | **<0.001** | **0.02** | **0.35** | **-78.86** | **2** | **15.77** | **<0.001** | ******* |
| *Reacted peacefully* | Intercept | -1.73 | 0.18 | 2.16 | -0.80 | 0.42 |  |  |  |  |  |  |  |
| SNP1 | -0.02 | 0.98 | 1.12 | -0.01 | 0.988 | 0.11 | 8.79 | -71.02 | 2 | 0.081 | 0.960 |  |
| **SNP2** | **2.47** | **11.78** | **0.89** | **2.78** | **0.006** | **2.06** | **67.20** | **-80.44** | **2** | **18.93** | **<0.001** | ******* |
| **SNP3** | **-1.95** | **0.14** | **0.69** | **-2.84** | **<0.001** | **0.04** | **0.55** | **-78.86** | **2** | **15.77** | **<0.001** | ******* |

LRT = likelihood ratio test. Asterisks denote statistical p-values with *** = p-value <0.001. SE = standard error. CI = Confidence Interval. Statistically significant genes are represented in bold letters.

**Table S12. Results of multinomial logistic regression Model 4 compared with the baseline *started aggression***

| **Behaviour** | **SNPs or DEGs** | **Estimate** | **logn odds ratio** | **SE** | **Z-statistics** | **p-value** | **lower CI** | **upper CI** | **Log-likelihood LRT** | **df LRT** | **χ2 value LRT** | **p-value LRT** | **significance LRT** |
| --- | --- | --- | --- | --- | --- | --- | --- | --- | --- | --- | --- | --- | --- |
| *Reacted aggressively* | Intercept | -4.06 | 0.02 | 0.11 | -37.84 |  |  |  |  |  |  |  |  |
| SNP1 | 0.19 | 1.22 | 0.46 | 0.42 |  | 0.49 | 3.02 | -62.54 | 2 | 0.53 | 0.769 |  |
| **SNP2** | **3.67** | **39.21** | **0.32** | **11.51** | ******* | **20.99** | **73.23** | **-70.52** | **2** | **16.49** | **<0.001** | ******* |
| **SNP3** | **-2.83** | **0.06** | **0.38** | **7.46** | ******* | **0.03** | **0.12** | **-69.80** | **2** | **15.03** | **<0.001** | ******* |
| *CG3061* | 0.00 | 1.00 | 0.01 | 0.01 |  | 0.98 | 1.02 | -62.28 | 2 | <0.001 | 0.999 |  |
| *silver* | 0.00 | 1.00 | 00 | 0.67 |  | 0.99 | 1.01 | -62.76 | 2 | 0.95 | 0.621 |  |
| *Syt4* | -0.01 | 0.99 | 0.00 | -1.22 |  | 0.99 | 1.00 | -63.07 | 2 | 1.58 | 0.454 |  |
| ***yellow-d2*** | **0.01** | **1.00** | **0.00** | **2.15** | ***** | **1.00** | **1.01** | **-65.91** | **2** | **7.26** | **0.027** | ***** |
| *Reacted peacefully* | Intercept | -1.07 | 0.34 | 0.11 | -9.37 |  |  |  |  |  |  |  |  |
| SNP1 | -0.53 | 0.59 | 0.48 | -1.09 |  | 0.23 | 1.52 | -62.54 | 2 | 0.53 | 0.769 |  |
| SNP2 | **2.46** | 11.76 | **0.40** | **6.09** | ******* | **5.32** | **26.00** | **-70.52** | **2** | **16.49** | **<0.001** | ******* |
| SNP3 | **-1.96** | 0.14 | **0.41** | **4.81** | ******* | **0.06** | **0.31** | **-69.80** | **2** | **15.03** | **<0.001** | ******* |
| *CG3061* | 0.00 | 1.00 | 0.01 | 0.02 |  | 0.98 | 1.02 | -62.28 | 2 | <0.001 | 0.999 |  |
| *silver* | 0.00 | 1.00 | 00 | 0.12 |  | 0.99 | 1.01 | -62.76 | 2 | 0.95 | 0.621 |  |
| *Syt4* | 0.00 | 1.00 | 0.00 | -0.82 |  | 0.99 | 1.01 | -63.07 | 2 | 1.58 | 0.454 |  |
| ***yellow-d2*** | **0.01** | **1.00** | **0.00** | **2.36** | ***** | **1.00** | **1.01** | **-65.91** | **2** | **7.26** | **0.027** | ***** |

SNPs = Single Nucleotide Polymorphism, DEGs = Differentially expressed genes, LRT = likelihood ratio test. SE = standard error. CI = Confidence Interval. χ2 value LRT = the Chi-Squared value of the LRT test, Asterisks denote statistical p-values with *** = p-value <0.001 and * = p-value <0.05. Statistically significant genes are represented in bold letters.

**Table S13. Nagelkerke Pseudo-R2 of all multinomial logistic regression models**

| **Model comparisons** | **Model** | **Nagelkerke Pseudo-R2** |
| --- | --- | --- |
| Models 2-8 | **Model 2** | **0.41** |
| **Model 4** | **0.55** |
| Model 3 | 0.26 |
| Model 6 | 0.48 |
| Model 8 | 0.63 |
| Model 7 | 0.42 |
| Model 5 | 0.11 |
| Models 10-16 | Model 10 | 0.41 |
| **Model 12** | **0.50** |
| Model 11 | 0.16 |
| Model 14 | 0.48 |
| Model 16 | 0.58 |
| Model 13 | 0.11 |
| Model 15 | 0.28 |
| Models 18-24 | **Model 20** | **0.71** |
| Model 18 | 0.41 |
| Model 19 | 0.48 |
| Model 22 | 0.48 |
| Model 23 | 0.61 |
| Model 24 | 0.76 |
| Model 21 | 0.11 |

Note that the order of the Models follows the Akaike Information Criterion for small sample sizes (AICc) comparison. Models 1, 9, and 17 are not included as they are the intercept model. Models highlighted in grey are the best models and models in bold font are the models selected for further inspection.

**Table S14. Emmeans contrasts for Models 2, 4, 12, and 20**

| **Model** | **Contrast** | **Estimate** | **SE** | **df** | **t-ratio** | **p-value** |
| --- | --- | --- | --- | --- | --- | --- |
| 2 | *Started aggression* vs *reacted aggressively* | 0.3302 | 0.128 | 8 | 2.590 | 0.0741 |
| *Started aggression* vs *reacted peacefully* | 0.3533 | 0.137 | 8 | 2.579 | 0.0753 |
| *Reacted aggressively* vs *reacted peacefully* | 0.0231 | 0.111 | 8 | 0.208 | 0.9765 |
| 4 | *Started aggression* vs *reacted aggressively* | 0.235 | 0.112 | 16 | 2.098 | 0.122 |
| *Started aggression* vs *reacted peacefully* | 0.270 | 0.126 | 16 | 2.137 | 0.114 |
| *Reacted aggressively* vs *reacted peacefully* | 0.035 | 0.125 | 16 | 0.276 | 0.958 |
| 12 | *Started aggression* vs *reacted aggressively* | 0.341 | 0.138 | 14 | 2.472 | 0.065 |
| ***Started aggression* vs *reacted peacefully*** | **0.378** | **0.134** | **14** | **2.818** | **0.034*** |
| *Reacted aggressively* vs *reacted peacefully* | 0.037 | 0.116 | 14 | 0.319 | 0.958 |
| 20 | ***Started aggression* vs *reacted aggressively*** | **-0.341** | **-0.057** | **22** | **-5.984** | **<0.001***** |
| ***Started aggression* vs *reacted peacefully*** | **-0.479** | **-0.069** | **22** | **-6.923** | **<0.001***** |
| *Reacted aggressively* vs *reacted peacefully* | -0.138 | 0.113 | 22 | -1.225 | 0.451 |

Note: SE = standard error. df= degrees of freedom. Statistically significant comparisons are highlighted in bold letters. Ssterisks denote statistical p-values with *** = p-value <0.001 and * = p-value <0.05.

**Table S15. Log-likelihood ratio tests for Models 2, 4, 12, and 20**

| **Model** | **Variable** | **Log-likelihood** | **df** | **χ2 test value** | **p-value** |
| --- | --- | --- | --- | --- | --- |
| Model2 | SNP1 | -71.015 | 6 | 0.0814 | 0.960 |
| **SNP2** | **-80.437** | **6** | **18.925** | **<0.001***** |
| **SNP3** | **-78.860** | **6** | **15.77** | **<0.001***** |
| Model4 | SNP1 | -62.542 | 14 | 0.5263 | 0.769 |
| **SNP2** | **-70.524** | **14** | **16.489** | **<0.001***** |
| **SNP3** | **-29.795** | **14** | **15.031** | **<0.001***** |
| Gene *CG3061* | -62.280 | 14 | 0.0006 | 0.999 |
| Gene *silver* | -62.755 | 14 | 0.9518 | 0.6213 |
| Gene *Syt* | -63.069 | 14 | 1.5787 | 0.4541 |
| **Gene *yellow-d2*** | **-65,910** | **14** | **7.2606** | **0.0265*** |
| Model 12 | SNP1 | -65.220 | 12 | 0.1609 | 0.923 |
| **SNP2** | **-73.898** | **12** | **17.517** | **<0.001***** |
| **SNP3** | **-73.060** | **12** | **15.841** | **<0.001***** |
| Gene *CNBP* | -66.415 | 12 | 2.551 | 0.279 |
| Gene *CG3902* | -66.079 | 12 | 1.880 | 0.391 |
| **Gene *CG34367*** | **-68.754** | **12** | **7.230** | **0.029*** |
| Model 20 | SNP1 | -48.427 | 20 | 0.061 | 0.970 |
| **SNP2** | **-55.193** | **20** | **13.593** | **0.001**** |
| **SNP3** | **-60.409** | **20** | **24.024** | **<0.001***** |
| **Gene *BicC*** | **-53.104** | **20** | **9.415** | **0.009**** |
| **Gene *Pif1*** | **-52.749** | **20** | **8.705** | **0.0129*** |
| Gene *Exo84* | -49.617 | 20 | 2.441 | 0.295 |
| Gene *PlexA* | -48.940 | 20 | 1.086 | 0.581 |
| Gene *KaiR1d* | -50.055 | 20 | 3.318 | 0.190 |
| Gene *Rdl* | -49.523 | 20 | 2.253 | 0.324 |
| **Gene *RFC3*** | **-51.905** | **20** | **7.017** | **0.029*** |

Note: df= degrees of freedom. χ2 test value = Chi-Squared test value. Asterisks denote p-values with *** = p-value <0.001, ** = p-value <0.01, and * = p-value <0.05. df= degrees of freedom. Statistically significant Single Nucleotide Polymorphisms (SNPs) and differentially-expresses genes (DEGs) are represented in bold letters.

**Table S16. Results of multinomial logistic regression Model 12 compared with the baseline *started aggression***

| **Behaviour** | **SNP or DEG** | **Estimate** | **logn odds ratio** | **SE** | **Z-statistics** | **p-value** | **Lower CI** | **Upper CI** | **Log-likelihood LRT** | **df LRT** | **χ2 value LRT** | **p-value LRT** | **significance LRT** |
| --- | --- | --- | --- | --- | --- | --- | --- | --- | --- | --- | --- | --- | --- |
| *Reacted aggressively* | Intercept | -4.04 |  | 2.66 | -1.52 |  |  |  |  |  |  |  |  |
| SNP1 | 0.32 | 1.37 | 1.21 | 0.26 | 0.792 | 0.13 | 14.59 | -65.22 | 2 | 0.16 | 0.923 |  |
| **SNP2** | **3.47** | **32.05** | **1.19** | **2.92** | **0.003** | **3.13** | **327.64** | **-73.90** | **2** | **17.52** | **0.000** | ******* |
| **SNP3** | **-2.57** | **0.08** | **0.79** | **-3.26** | **0.001** | **0.02** | **0.36** | **-73.06** | **2** | **15.84** | **0.000** | ******* |
| *CG3800* | 0.00 | 1.00 | 0.00 | -0.74 | 0.460 | 0.99 | 1.00 | -66.42 | 2 | 2.55 | 0.279 |  |
| *CG3902* | -0.01 | 0.99 | 0.02 | -0.49 | 0.622 | 0.96 | 1.02 | -66.08 | 2 | 1.88 | 0.391 |  |
| ***CG34367*** | **0.06** | **1.07** | **0.04** | **1.58** | **0.114** | **0.98** | **1.15** | **-68.75** | **2** | **7.23** | **0.027** | ***** |
| *Reacted peacefully* | Intercept | -1.69 |  | 2.30 | -0.74 |  |  |  |  |  |  |  |  |
| SNP1 | -0.11 | 0.90 | 1.17 | -0.09 | 0.927 | 0.09 | 8.95 | -65.22 | 2 | 0.16 | 0.923 |  |
| SNP2 | **2.43** | **11.37** | **0.91** | **2.66** | **0.008** | **1.89** | **68.32** | **-73.90** | **2** | **17.52** | **0.000** | ******* |
| SNP3 | **-2.20** | **0.11** | **0.75** | **-2.95** | **0.003** | **0.03** | **0.48** | **-73.06** | **2** | **15.84** | **0.000** | ******* |
| *CG3800* | 0.00 | 1.00 | 0.00 | 0.70 | 0.485 | 1.00 | 1.00 | -66.42 | 2 | 2.55 | 0.279 |  |
| *CG3902* | 0.01 | 1.01 | 0.02 | 0.81 | 0.416 | 0.98 | 1.05 | -66.08 | 2 | 1.88 | 0.391 |  |
| ***CG34367*** | **-0.02** | **0.98** | **0.04** | **-0.43** | **0.665** | **0.91** | **1.06** | **-68.75** | **2** | **7.23** | **0.027** | ***** |

SNPs = Single Nucleotide Polymorphism, DEGs = Differentially expressed genes, LRT = likelihood ratio test. SE = standard error. CI = Confidence Interval. χ2 value LRT = the Chi-Squared value of the LRT test, Asterisks denote statistical p-values with *** = p-value <0.001 and * = p-value <0.05. Statistically significant genes are represented in bold letters.

**Table S17. Results of the multinomial logistic regression Model 20 compared with the baseline *started aggression***

| **Behaviour** | **SNP or DEG** | **Estimate** | **logn odds ratio** | **SE** | **Z-statistics** | **p-value** | **Lower CI** | **Upper CI** | **Log-likelihood LRT** | **df LRT** | **χ2 value LRT** | **p-value LRT** | **significance LRT** |
| --- | --- | --- | --- | --- | --- | --- | --- | --- | --- | --- | --- | --- | --- |
| *Reacted aggressively* | Intercept | -4.66 |  | 0.00 | -5550.79 |  |  |  |  |  |  |  |  |
| SNP1 | 0.44 | 53.90 | 0.00 | 523.24 | <0.001 | 1.55 | 1.56 | -48.43 | 2 | 0.06 | 0.970 |  |
| **SNP2** | **3.99** | **0.01** | **0.00** | **2534.23** | **<0.001** | **53.73** | **54.06** | **-55.19** | **2** | **13.59** | **0.001** | ****** |
| **SNP3** | **-4.94** | **1.94** | **0.00** | **-3885.30** | **<0.001** | **0.01** | **0.01** | **-60.41** | **2** | **24.02** | **0.000** | ******* |
| ***BicC*** | **0.66** | **1.25** | **0.01** | **120.22** | **<0.001** | **1.92** | **1.97** | **-53.10** | **2** | **9.41** | **0.009** | ****** |
| ***Pif1*** | **0.23** | **1.00** | **0.00** | **132.92** | **<0.001** | **1.25** | **1.26** | **-52.75** | **2** | **8.71** | **0.013** | ***** |
| ***Exo84*** | **0.00** | **1.00** | **0.00** | **-1.99** | **0.046** | **1.00** | **1.00** | **-49.62** | **2** | **2.44** | **0.295** |  |
| *PlexA* | 0.00 | 1.12 | 0.03 | -0.02 | 0.984 | 0.95 | 1.06 | -48.94 | 2 | 1.09 | 0.581 |  |
| ***Kai1R1d*** | **0.11** | **1.00** | **0.03** | **3.33** | **0.001** | **1.05** | **1.19** | **-50.06** | **2** | **3.32** | **0.190** |  |
| *Rdl* | 0.00 | 1.29 | 0.00 | -1.05 | 0.294 | 1.00 | 1.00 | -49.52 | 2 | 2.25 | 0.324 |  |
| ***RFC3*** | **0.25** | **53.90** | **0.02** | **15.12** | **<0.001** | **1.25** | **1.33** | **-51.90** | **2** | **7.02** | **0.030** | ***** |
| *Reacted peacefully* | Intercept | -3.73 |  | 0.00 | -4450.71 |  |  |  |  |  |  |  |  |
| SNP1 | 0.45 | 1.56 | 0.00 | **494.85** | <0.001 | 1.56 | 1.56 | -48.43 | 2 | 0.06 | 0.970 |  |
| **SNP2** | **3.44** | **31.03** | **0.00** | **2261.55** | **<0.001** | **30.94** | **31.12** | **-55.19** | **2** | **13.59** | **0.001** | ****** |
| **SNP3** | **-4.17** | **0.02** | **0.00** | **-3082.30** | **<0.001** | **0.02** | **0.02** | **-60.41** | **2** | **24.02** | **0.000** | ******* |
| ***BicC*** | **0.66** | **1.93** | **0.01** | **118.51** | **<0.001** | **1.91** | **1.95** | **-53.10** | **2** | **9.41** | **0.009** | ****** |
| ***Pif1*** | **-0.12** | **0.89** | **0.00** | **-37.90** | **<0.001** | **0.89** | **0.90** | **-52.75** | **2** | **8.71** | **0.013** | ***** |
| ***Exo84*** | **0.00** | **1.00** | **0.00** | **-2.08** | **0.038** | **1.00** | **1.00** | **-49.62** | **2** | **2.44** | **0.295** |  |
| *PlexA* | -0.03 | 0.97 | 0.03 | -0.92 | 0.356 | 0.92 | 1.03 | -48.94 | 2 | 1.09 | 0.581 |  |
| ***Kai1R1d*** | **0.18** | **1.20** | **0.03** | **5.45** | **<0.001** | **1.13** | **1.29** | **-50.06** | **2** | **3.32** | **0.190** |  |
| *Rdl* | 0.00 | 1.00 | 0.00 | 0.00 | 0.997 | 1.00 | 1.00 | -49.52 | 2 | 2.25 | 0.324 |  |
| ***RFC3*** | **0.24** | **1.27** | **0.02** | **14.20** | **<0.001** | **1.23** | **1.31** | **-51.90** | **2** | **7.02** | **0.030** | ***** |

SNPs = Single Nucleotide Polymorphism, DEGs = Differentially expressed genes, LRT = likelihood ratio test. SE = standard error. CI = Confidence Interval. χ2 value LRT = the Chi-Squared value of the LRT test, Asterisks denote statistical p-values with *** = p-value <0.001 ** = p-value <0.01, and * = p-value <0.05. Statistically significant genes are represented in bold letters.

**Table S18. Results of the final multinomial logistic regression model comparing the baseline behaviour *started aggression* with *reacted aggressively* and *reacted peacefully* including log-likelihood ratio tests**

| **Behaviour** | **SNP or DEG** | **Estimate** | **logn odds ratio** | **SE** | **Z-statistics** | **p-value** | **lower CI** | **upper CI** | **Log-likelihood LRT** | **df LRT** | **χ2 value LRT** | **p-value LRT** | **significance LRT** |
| --- | --- | --- | --- | --- | --- | --- | --- | --- | --- | --- | --- | --- | --- |
| *Reacted aggressively* | **SNP1** | **133.76** | **4.90** | **0.00** | **3240.82** | **<0.001** | **133.36** | **134.15** | **-52.12** | **20** | **15.01** | **0.001** | ******* |
| **SNP3** | **0.02** | **-4.13** | **0.00** | **-3210.27** | **<0.001** | **0.02** | **0.02** | **-52.12** | **20** | **15.01** | **0.001** | ******* |
| ***yellow-d2*** | **1.03** | **0.03** | **0.01** | **2.69** | **0.007** | **1.01** | **1.05** | **-48.43** | **20** | **7.63** | **0.022** | ***** |
| ***BicC*** | **1.79** | **0.58** | **0.01** | **102.90** | **<0.001** | **1.77** | **1.81** | **-48.84** | **20** | **8.45** | **0.015** | ***** |
| ***Pif1*** | **1.41** | **0.34** | **0.00** | **168.31** | **<0.001** | **1.40** | **1.41** | **-48.95** | **20** | **8.67** | **0.013** | ***** |
| ***Exo84*** | **1.00** | **-0.0002** | **0.00** | **-3.73** | **0.000** | **1.00** | **1.00** | **-47.68** | **20** | **6.13** | **0.047** | ***** |
| *PlexA* | 1.02 | 0.02 | 0.03 | 0.57 | 0.567 | 0.96 | 1.08 | -45.15 | 20 | 1.07 | 0.585 | ns |
| ***KaiR1d*** | **1.36** | **0.31** | **0.04** | **8.54** | **0.000** | **1.27** | **1.46** | **-47.99** | **20** | **6.75** | **0.034** | ***** |
| ***Rdl*** | **1.00** | **0.00** | **0.00** | **-3.47** | **0.001** | **1.00** | **1.00** | **-48.88** | **20** | **8.53** | **0.014** | ***** |
| ***RFC3*** | **1.37** | **0.32** | **0.02** | **16.80** | **0.000** | **1.32** | **1.42** | **-51.03** | **20** | **12.83** | **0.002** | ****** |
| *Reacted peacefully* | **SNP1** | **44.58** | **3.80** | **0.00** | **2647.91** | **<0.001** | **44.45** | **44.70** | **-52.12** | **20** | **15.01** | **0.001** | ******* |
| **SNP3** | **0.02** | **-3.81** | **0.00** | **-3207.65** | **<0.001** | **0.02** | **0.02** | **-48.43** | **20** | **15.01** | **0.001** | ******* |
| ***yellow-d2*** | **1.02** | **0.02** | **0.01** | **2.21** | **0.027** | **1.00** | **1.04** | **-48.84** | **20** | **7.63** | **0.022** | ***** |
| ***BicC*** | **1.77** | **0.57** | **0.01** | **101.86** | **<0.001** | **1.75** | **1.79** | **-48.95** | **20** | **8.45** | **0.015** | ***** |
| ***Pif1*** | **1.00** | **0.001** | **0.00** | **0.22** | **0.828** | **0.99** | **1.01** | **-47.68** | **20** | **8.67** | **0.013** | ***** |
| ***Exo84*** | **1.00** | **-0.0002** | **0.00** | **-3.43** | **0.001** | **1.00** | **1.00** | **-45.15** | **20** | **6.13** | **0.047** | ***** |
| *PlexA* | 0.99 | -0.01 | 0.03 | -0.36 | 0.716 | 0.93 | 1.05 | -47.99 | 20 | 1.07 | 0.585 | ns |
| ***KaiR1d*** | **1.43** | **0.36** | **0.04** | **10.20** | **0.000** | **1.34** | **1.53** | **-48.88** | **20** | **6.75** | **0.034** | ***** |
| ***Rdl*** | **1.00** | **-0.002** | **0.00** | **-2.59** | **0.009** | **1.00** | **1.00** | **-51.03** | **20** | **8.53** | **0.014** | ***** |
| ***RFC3*** | **1.33** | **0.29** | **0.02** | **15.31** | **0.000** | **1.28** | **1.38** | **-52.12** | **20** | **12.83** | **0.002** | ****** |

SNPs = Single Nucleotide Polymorphism, DEGs = Differentially expressed genes, LRT = likelihood ratio test. SE = standard error. CI = Confidence Interval. χ2 value LRT = the Chi-Squared value of the LRT test, Asterisks denote statistical p-values with *** = p-value <0.001 ** = p-value <0.01, and * = p-value <0.05. Statistically significant genes are represented in bold letters.

**Table S19. Gene-ontology data for the differentially expressed genes and the SNP3 gene *gd***

| **Source** | **Term name** | **Gene Ontology Term ID** | **Adjusted p-value** | **Negative log10 of adjusted p-value** | **Term size** | **Query size** | **Intersections** |
| --- | --- | --- | --- | --- | --- | --- | --- |
| MF | transmitter-gated monoatomic ion channel activity | GO: 0022824 | 0.009 | 2.039 | 45 | 8 | *KaiR1D, Rdl* |
| MF | cyclase activator activity | GO:0010853 | 0.015 | 1.835 | 3 | 8 | *PlexA* |
| MF | semaphorin receptor activity | GO:0017154 | 0.015 | 1.835 | 2 | 8 | *PlexA* |
| MF | 14-3-3 protein binding | GO:0071889 | 0.015 | 1.835 | 3 | 8 | *PlexA* |
| MF | ATP-dependent activity, acting on DNA | GO:0008094 | 0.015 | 1.835 | 74 | 8 | *Pif1, RFC3* |
| MF | 5'-3' DNA helicase activity | GO:0043139 | 0.017 | 1.761 | 4 | 8 | *Pif1* |
| BP | sensory neuron axon guidance | GO:0097374 | 0.045 | 1.348 | 5 | 8 | *PlexA* |
| BP | calcium ion import across plasma membrane | GO:0098703 | 0.045 | 1.348 | 6 | 8 | *KaiR1D* |
| BP | semaphorin-plexin signaling pathway involved in axon guidance | GO:1902287 | 0.045 | 1.348 | 2 | 8 | *PlexA* |
| BP | semaphorin-plexin signaling pathway involved in regulation of photoreceptor cell axon guidance | GO:2000305 | 0.045 | 1.348 | 2 | 8 | *PlexA* |
| BP | DNA replication | GO:0006260 | 0.045 | 1.348 | 134 | 8 | *Pif1, RFC3* |
| BP | positive regulation of neurotransmitter secretion | GO:0001956 | 0.045 | 1.348 | 6 | 8 | *KaiR1D* |
| BP | positive regulation of guanylate cyclase activity | GO:0031284 | 0.045 | 1.348 | 2 | 8 | *PlexA* |
| BP | regulation of membrane potential | GO:0042391 | 0.045 | 1.348 | 102 | 8 | *KaiR1D, Rdl* |
| BP | leading strand elongation | GO:0006272 | 0.049 | 1.314 | 8 | 8 | *RFC3* |
| BP | synaptic vesicle targeting | GO:0016080 | 0.049 | 1.314 | 7 | 8 | *Exo84* |
| BP | negative regulation of oskar mRNA translation | GO:0007319 | 0.049 | 1.314 | 8 | 8 | *BicC* |
| BP | positive regulation of neuromuscular synaptic transmission | GO:1900075 | 0.049 | 1.314 | 8 | 8 | *KaiR1D* |
| CC | replication fork | GO:0005657 | 0.018 | 1.735 | 35 | 9 | *Pif1, RFC3* |
| CC | semaphorin receptor complex | GO:0002116 | 0.018 | 1.735 | 2 | 9 | *PlexA* |
| CC | postsynaptic membrane | GO:0045211 | 0.018 | 1.735 | 71 | 9 | *KaiR1D, Rdl* |
| CC | GABA receptor complex | GO:1902710 | 0.018 | 1.735 | 2 | 9 | *Rdl* |
| CC | neuronal cell body membrane | GO:0032809 | 0.020 | 1.693 | 4 | 9 | *Rdl* |
| CC | Elg1 RFC-like complex | GO:0031391 | 0.020 | 1.693 | 5 | 9 | *RFC3* |
| CC | exocyst | GO:0000145 | 0.029 | 1.536 | 8 | 9 | *Exo84* |
| CC | chloride channel complex | GO:0034707 | 0.041 | 1.384 | 13 | 9 | *Rdl* |

MF = Molecular function, BP = Biological processes, CC = Cellular components, GO = Gene Ontology. Retrieved on 26.12.2025 from g:Profiler (<https://biit.cs.ut.ee/gprofiler/gost>).

**Table S20. List of the SNP and DEGs used in the GeneMania analysis**

| **Gene list** | **Function** | **Overall function** | **FDR-corrected p-value** | **Genes in network** | **Genes in genome** |
| --- | --- | --- | --- | --- | --- |
| *BicC, gd, KaiR1d, PlexA, Rdl, yellow-d2, Exo84, Pif1, RFC3* | **nuclear chromosome segregation** | **Biological processes** | **0.004** | **6** | **161** |
| **DNA metabolic process** | **Biological processes** | **0.004** | **7** | **271** |
| **extracellular ligand-gated ion channel activity** | **Molecular functions** | **0.004** | **4** | **35** |
| **chromosome segregation** | **Biological processes** | **0.004** | **6** | **165** |
| **DNA recombination** | **Biological processes** | **0.004** | **5** | **94** |
| **meiosis I cell cycle process** | **Biological processes** | **0.007** | **5** | **108** |
| **ligand-gated ion channel activity** | **Molecular functions** | **0.048** | **4** | **80** |
| transmitter-gated ion channel activity |  | 0.053 | 3 | 30 |
| transmitter-gated channel activity |  | 0.053 | 3 | 30 |
| meiotic cell cycle process |  | 0.088 | 5 | 202 |
| meiotic cell cycle |  | 0.088 | 5 | 208 |
| neurotransmitter receptor activity |  | 0.088 | 3 | 39 |
| *BicC, KaiR1d, PlexA, Rdl, yellow-d2, Exo84, Pif1, RFC3* (without *gd*) | **extracellular ligand-gated ion channel activity** | **Molecular functions** | **0.010** | **4** | **35** |
| **trans-synaptic signaling** | **Biological processes** | **0.040** | **6** | **287** |
| **nuclear chromosome segregation** | **Biological processes** | **0.040** | **5** | **161** |
| **synaptic signaling** | **Biological processes** | **0.040** | **6** | **288** |
| **DNA metabolic process** | **Biological processes** | **0.040** | **6** | **271** |
| **chromosome segregation** | **Biological processes** | **0.040** | **5** | **165** |
| **anterograde trans-synaptic signaling** | **Biological processes** | **0.040** | **6** | **286** |
| **ligand-gated ion channel activity** | **Molecular functions** | **0.040** | **4** | **80** |
| **transmitter-gated ion channel activity** | **Molecular functions** | **0.043** | **3** | **30** |
| **transmitter-gated channel activity** | **Molecular functions** | **0.043** | **3** | **30** |
| DNA recombination |  | 0.050 | 4 | 94 |
| neurotransmitter receptor activity |  | 0.079 | 3 | 39 |

SNPs = Single Nucleotide Polymorphism, DEGs = Differentially expressed genes, FDR = false-discovery rate. Bold font represents significant DEGs after FDR-correction.

**References**

1. A. Dobin *et al.*, STAR: ultrafast universal RNA-seq aligner. *Bioinformatics* **29**, 15-21 (2012).

2. F. M. Steiner *et al.*, Abandoning aggression but maintaining self-nonself discrimination as a first stage in ant supercolony formation. *Curr Biol* **17**, 1903-1907 (2007).

3. S. Davidson *et al.*, Analysis of the effects of depression associated polymorphisms on the activity of the BICC1 promoter in amygdala neurones. *Pharmacogenomics J* **16**, 366-374 (2016).

4. K. T. Ota, W. Andres, D. A. Lewis, C. A. Stockmeier, R. S. Duman, BICC1 expression is elevated in depressed subjects and contributes to depressive behavior in rodents. *Neuropsychopharmacology* **40**, 711-718 (2015).

5. J. Ryan *et al.*, GWAS-identified risk variants for major depressive disorder: Preliminary support for an association with late-life depressive symptoms and brain structural alterations. *Eur Neuropsychopharmacol* **26**, 113-125 (2016).

6. M. R.-C. Kraus *et al.*, Two mutations in human BICC1 resulting in Wnt pathway hyperactivity associated with cystic renal dysplasia. *Hum Mutat* **33**, 86-90 (2012).

7. Y. Komiya, R. Habas, Wnt signal transduction pathways. *Organogenesis* **4**, 68-75 (2008).

8. I. E. Vega, S.-C. Hsu, The Exocyst complex associates with microtubules to mediate vesicle targeting and neurite outgrowth. *J Neurosci* **21**, 3839-3848 (2001).

9. S.-C. Hsu *et al.*, The mammalian brain rsec6/8 complex. *Neuron* **17**, 1209-1219 (1996).

10. J. T. Blankenship, M. T. Fuller, J. A. Zallen, The *Drosophila* homolog of the Exo84 exocyst subunit promotes apical epithelial identity. *J Cell Sci* **120**, 3099-3110 (2007).

11. T. Tanaka, K. Goto, M. Iino, Diverse functions and signal transduction of the Exocyst complex in tumor cells. *J Cell Physiol* **232**, 939-957 (2017).

12. B. Kiragasi, J. Wondolowski, Y. Li, D. K. Dickman, A presynaptic glutamate receptor subunit confers robustness to neurotransmission and homeostatic potentiation. *Cell Reports* **19**, 2694-2706 (2017).

13. X. Liu, W. C. Krause, R. L. Davis, GABAA receptor RDL inhibits *Drosophila* olfactory associative learning. *Neuron* **56**, 1090-1102 (2007).

14. Q. Yuan, Y. Song, C.-H. Yang, L. Y. Jan, Y. N. Jan, Female contact modulates male aggression via a sexually dimorphic GABAergic circuit in *Drosophila*. *Nat Neurosci* **17**, 81-88 (2014).

15. J. Li, B. M. Christensen, in *Recent Advances in Entomological Research: From Molecular Biology to Pest Management,* T. Liu, L. Kang, Eds. (Beijing and Springer-Verlag Berlin Heidelberg, Heidelberg, 2011), pp. 121-131.

16. M. D. Drapeau, A. Radovic, P. J. Wittkopp, A. D. Long, A gene necessary for normal male courtship, yellow, acts downstream of fruitless in the *Drosophila melanogaster* larval brain. *J Neurobiol* **55**, 53-72 (2003).

17. M. D. Drapeau, A novel hypothesis on the biochemical role of the *Drosophila* Yellow protein. *Biochem Biophys Res Com* **311**, 1-3 (2003).

18. L. Tamagnone *et al.*, Plexins are a large family of receptors for transmembrane, secreted, and gpi-anchored semaphorins in vertebrates. *Cell* **99**, 71-80 (1999).

19. H. P. Fisher *et al.*, De novo assembly of a transcriptome for the cricket *Gryllus bimaculatus* prothoracic ganglion: An invertebrate model for investigating adult central nervous system compensatory plasticity. *PLoS ONE* **13**, e0199070 (2018).

20. Y. Duan *et al.*, Semaphorin 5A inhibits synaptogenesis in early postnatal- and adult-born hippocampal dentate granule cells. *Elife* **3**, e04390 (2014).

21. W.-H. Chung, To peep into Pif1 helicase: Multifaceted all the way from genome stability to repair-associated DNA synthesis. *J Microbiol* **52**, 89-98 (2014).

22. A. K. Byrd, K. D. Raney, Structure and function of Pif1 helicase. *Biochem Soc Trans* **45**, 1159-1171 (2017).

23. X. Li, P. M. Burgers, Molecular cloning and expression of the Saccharomyces cerevisiae RFC3 gene, an essential component of replication factor C. *Proc Natl Acad Sci* **91**, 868-872 (1994).

24. J. Zhou *et al.*, Downregulation of hsa_circ_0011946 suppresses the migration and invasion of the breast cancer cell line MCF-7 by targeting RFC3. *Cancer Manag Res* **10**, 535-544 (2018).

25. D. C. Queller, K. F. Goodnight, Estimating relatedness using genetic-markers. *Evolution* **43**, 258-275 (1989).

26. P. Pamilo, Evolution of colony characteristics in social insects. II. Number of reproductive individuals. *Am Nat* **138**, 412-433 (1991).

27. A. Manichaikul *et al.*, Robust relationship inference in genome-wide association studies. *Bioinformatics* **26**, 2867-2873 (2010).
