# Supplementary figures and images for: The gut microbiome, single nucleotide polymorphisms, and differentially expressed genes promote aggression in an ant
Source: Research Square preprint supplement (doi:10.21203/rs.3.rs-8539228/v1), 2026-01-09

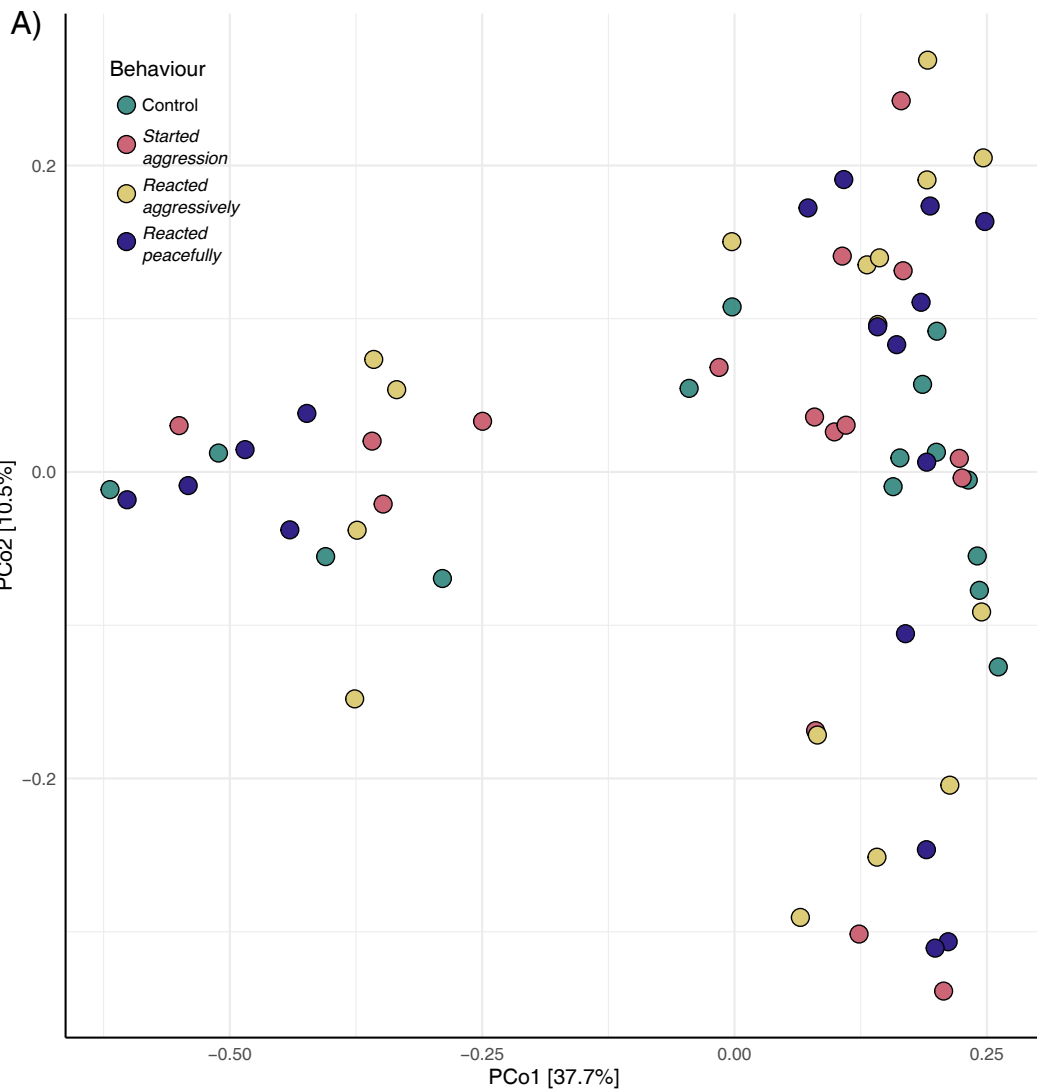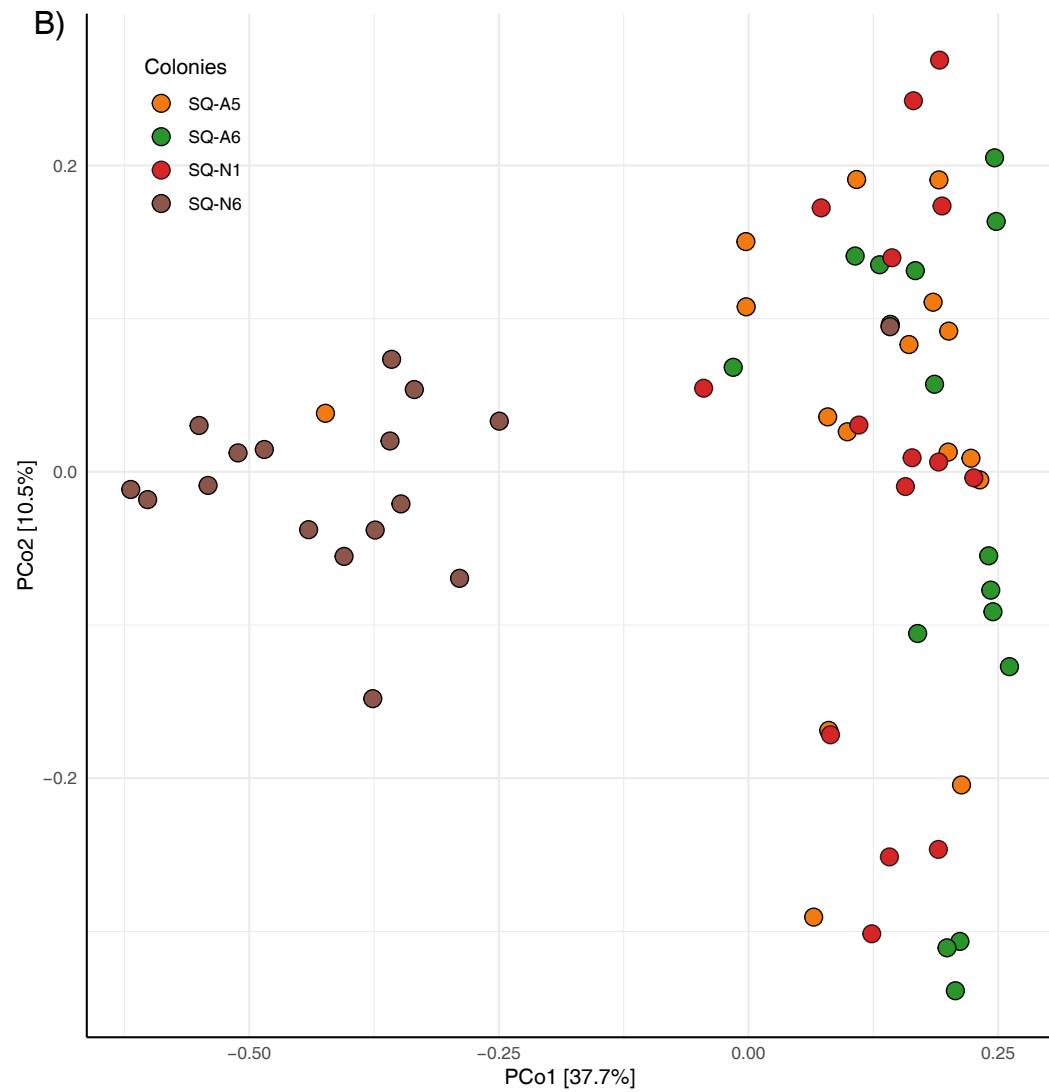

Supplement: Supplementary file 1 [file 27cc352be8182a74119ec8ba.pdf]
